# Supplementary material for: Aluminium complex as an efficient catalyst for the chemo-selective reduction of amides to amines
Source: Royal Society of Chemistry journal article supplement (doi:10.1039/c9dt01806a), 2019-01-01
Supplement: c9dt01806a1.pdf [file c9dt01806a1.pdf]

*Supporting Information for*

**Aluminium complex as an efficient catalyst for chemo-selective reduction of  
amides to amines**

Suman Das,<sup>a</sup> Himadri Karmakar,<sup>a</sup> Jayeeta Bhattacharjee,<sup>a</sup> Tarun K. Panda\*<sup>a</sup>

*Department of Chemistry, Indian Institute of Technology Hyderabad, Kandi – 502 285,  
Sangareddy, Telangana, India.*

**Table of contents**

1. Crystallography details
2. NMR spectra for metal complexes.
3. NMR spectra of the amines hydrochlorides.
4. References

### X-ray crystallographic analyses:

Single crystals of complexes **1a**, **1b** and **2b** were grown from a concentrated solution of toluene or toluene/THF (3:1) in an argon-filled atmosphere at -35 °C. A crystal of suitable dimensions of complexes **1a**, **1b** and **2b** were mounted on a CryoLoop (Hampton Research Corp.) with a layer of light mineral oil. All the crystals **1a**, **1b**, and **2b** were measured at 293 K. All measurements were made on a Rigaku Supernova X-calibur Eos CCD detector with graphite monochromatic Mo-K $\alpha$  (0.71073 Å) radiation. Crystal data and structure refinement parameters of complexes **1a**, **1b** and **2b** are summarized in Table TS1. The structures were solved by direct methods (SIR2004)<sup>[1]</sup> and refined on  $F^2$  by full-matrix least-squares methods, using SHELXL-2016/6.<sup>[2]</sup> Non-hydrogen atoms were anisotropically refined. H-atoms were included in the refinement on calculated positions riding on their carrier atoms. The function minimized was  $[\sum w(F_o^2 - F_c^2)^2]$  ( $w = 1 / [\sigma^2(F_o^2) + (aP)^2 + bP]$ ), where  $P = (\text{Max}(F_o^2, 0) + 2F_c^2) / 3$  with  $\sigma^2(F_o^2)$  from counting statistics. The function  $R1$  and  $wR2$  were  $(\sum ||F_o| - |F_c||) / \sum |F_o|$  and  $[\sum w(F_o^2 - F_c^2)^2 / \sum (wF_o^4)]^{1/2}$ , respectively. The ORTEP-3 program was used to draw the molecules of **1a**, **1b**, and **2b**. Crystallographic data (excluding structure factors) for the structures reported in this paper have been deposited with the Cambridge Crystallographic Data Centre as supplementary publication no. CCDC 1912620 (**1a**), 1912619 (**1b**) 1912621 (**2b**). Copies of the data can be obtained free of charge on application to CCDC, 12 Union Road, Cambridge CB21EZ, UK (fax: + (44)1223-336-033; email: [deposit@ccdc.cam.ac.uk](mailto:deposit@ccdc.cam.ac.uk)).

**Table TS1.** Crystallography table of metal complexes **1a**, **1b**, and **2b**.

| Crystal Parameters                                  | <b>1a</b>                                                           | <b>1b</b>                                                           | <b>2b</b>                                                           |
|-----------------------------------------------------|---------------------------------------------------------------------|---------------------------------------------------------------------|---------------------------------------------------------------------|
| Identification code                                 | 8421                                                                | 8494                                                                | 8524                                                                |
| CCDC No.                                            | 1912620                                                             | 1912619                                                             | 1912621                                                             |
| Empirical formula                                   | C <sub>21</sub> H <sub>17</sub> N <sub>2</sub> PS                   | C <sub>21</sub> H <sub>17</sub> N <sub>2</sub> PSe                  | C <sub>27</sub> H <sub>30</sub> AlN <sub>2</sub> PSe                |
| Formula weight                                      | 360.40                                                              | 407.30                                                              | 535.44                                                              |
| <i>T</i> (K)                                        | 293(2) K                                                            | 293(2) K                                                            | 293(2) K                                                            |
| $\lambda$ (Å)                                       | 0.71073                                                             | 0.71073                                                             | 0.71073                                                             |
| Crystal system                                      | Monoclinic                                                          | Monoclinic                                                          | Triclinic                                                           |
| Space group                                         | <i>P</i> 2 <sub>1</sub> / <i>n</i>                                  | <i>P</i> 2 <sub>1</sub> / <i>n</i>                                  | <i>P</i> -1                                                         |
| <i>a</i> (Å)                                        | 9.6363(4)                                                           | 9.6733(4)                                                           | 9.8019(13)                                                          |
| <i>b</i> (Å)                                        | 15.4223(6)                                                          | 15.4600(8)                                                          | 10.1178(13)                                                         |
| <i>c</i> (Å)                                        | 12.3931(4)                                                          | 12.4870(5)                                                          | 13.5450(19)                                                         |
| $\alpha$ (°)                                        | 90                                                                  | 90                                                                  | 89.947(11)                                                          |
| $\beta$ (°)                                         | 104.016(4)                                                          | 103.385(4)                                                          | 83.892(11)                                                          |
| $\gamma$ (°)                                        | 90                                                                  | 90                                                                  | 81.113(11)                                                          |
| <i>V</i> (Å <sup>3</sup> )                          | 1786.95(12)                                                         | 1816.70(14)                                                         | 1319.5(3)                                                           |
| <i>Z</i>                                            | 4                                                                   | 4                                                                   | 2                                                                   |
| <i>D</i> <sub>calc</sub> g cm <sup>-3</sup>         | 1.340                                                               | 1.489                                                               | 1.348                                                               |
| $\mu$ (mm <sup>-1</sup> )                           | 0.276                                                               | 2.160                                                               | 1.538                                                               |
| <i>F</i> (000)                                      | 752                                                                 | 824                                                                 | 552                                                                 |
| Theta range for data collection                     | 3.138 to 29.100 deg                                                 | 3.030 to 29.121 deg.                                                | 2.998 to 29.082 deg                                                 |
| Limiting indices                                    | -13 ≤ <i>h</i> ≤ 10,<br>-19 ≤ <i>k</i> ≤ 20,<br>-14 ≤ <i>l</i> ≤ 16 | -12 ≤ <i>h</i> ≤ 13,<br>-21 ≤ <i>k</i> ≤ 17,<br>-17 ≤ <i>l</i> ≤ 16 | -12 ≤ <i>h</i> ≤ 13,<br>-13 ≤ <i>k</i> ≤ 13,<br>-17 ≤ <i>l</i> ≤ 17 |
| Reflections collected / unique                      | 8530 / 4124<br>[ <i>R</i> (int) = 0.0420]                           | 13856 / 4328 [ <i>R</i> (int) = 0.0525]                             | 10966 / 6005 [ <i>R</i> (int) = 0.0490]                             |
| Completeness to theta                               | 99.8 %                                                              | 99.8 %                                                              | 99.8 %                                                              |
| Absorption correction                               | Multi-scan                                                          | Multi-scan                                                          | Multi-scan                                                          |
| Max. and min. transmission                          | 1.00000 and 0.91324                                                 | 1.00000 and 0.24268                                                 | 1.00000 and 0.93571                                                 |
| Refinement method                                   | Full-matrix least-squares on <i>F</i> <sup>2</sup>                  | Full-matrix least-squares on <i>F</i> <sup>2</sup>                  | Full-matrix least-squares on <i>F</i> <sup>2</sup>                  |
| Data / restraints / parameters                      | 4124 / 0 / 226                                                      | 4328 / 0 / 226                                                      | 6005 / 0 / 300                                                      |
| Goodness-of-fit on <i>F</i> <sup>2</sup>            | 1.064                                                               | 1.028                                                               | 1.047                                                               |
| Final <i>R</i> indices [ <i>I</i> > 2σ( <i>I</i> )] | <i>R</i> 1 = 0.0550,<br><i>wR</i> 2 = 0.1066                        | <i>R</i> 1 = 0.0485,<br><i>wR</i> 2 = 0.0957                        | <i>R</i> 1 = 0.0729,<br><i>wR</i> 2 = 0.1764                        |
| <i>R</i> indices (all data)                         | <i>R</i> 1 = 0.1010,<br><i>wR</i> 2 = 0.1370                        | <i>R</i> 1 = 0.0963,<br><i>wR</i> 2 = 0.1175                        | <i>R</i> 1 = 0.1274,<br><i>wR</i> 2 = 0.2092                        |



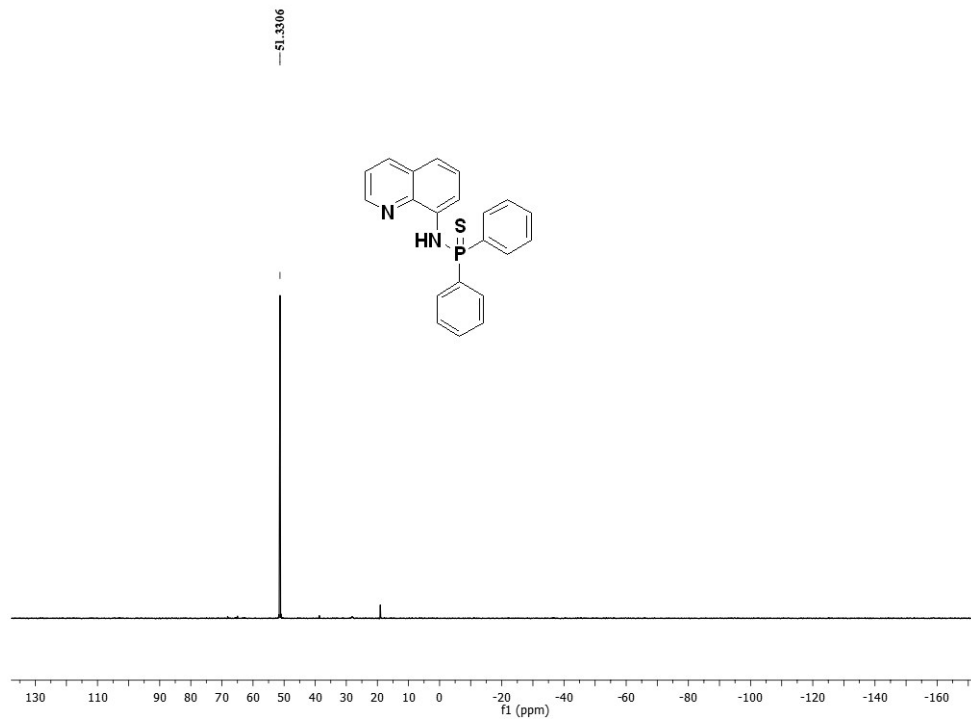

Figure FS3.  $^{13}\text{P}$  NMR spectra of complex 1a.

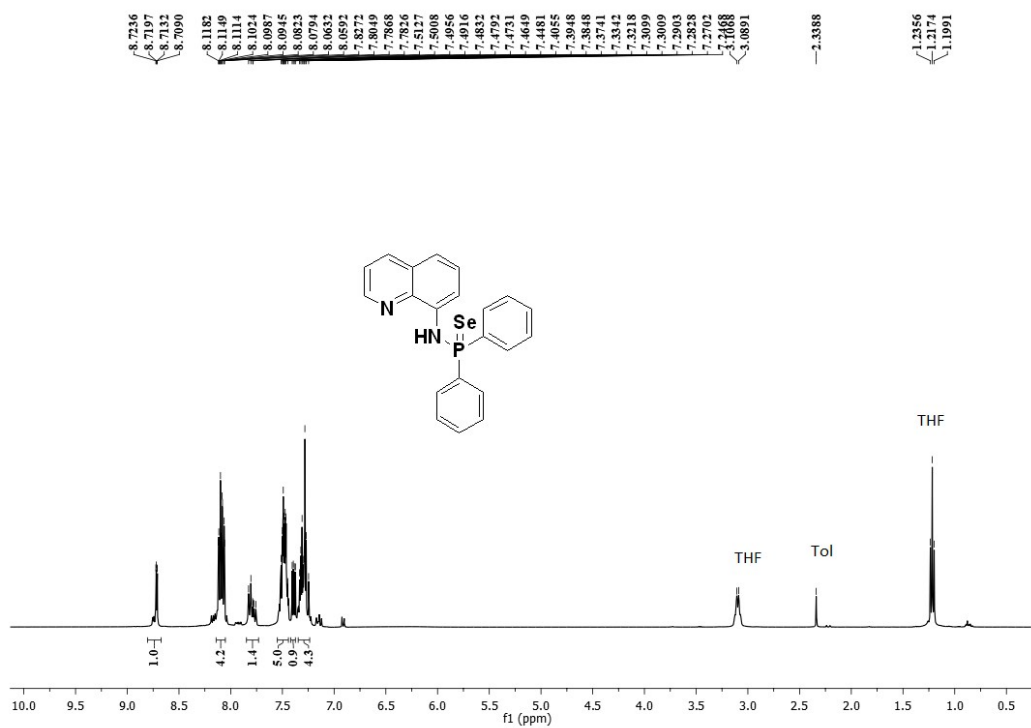

Figure FS4.  $^1\text{H}$  NMR spectra of complex 1b.

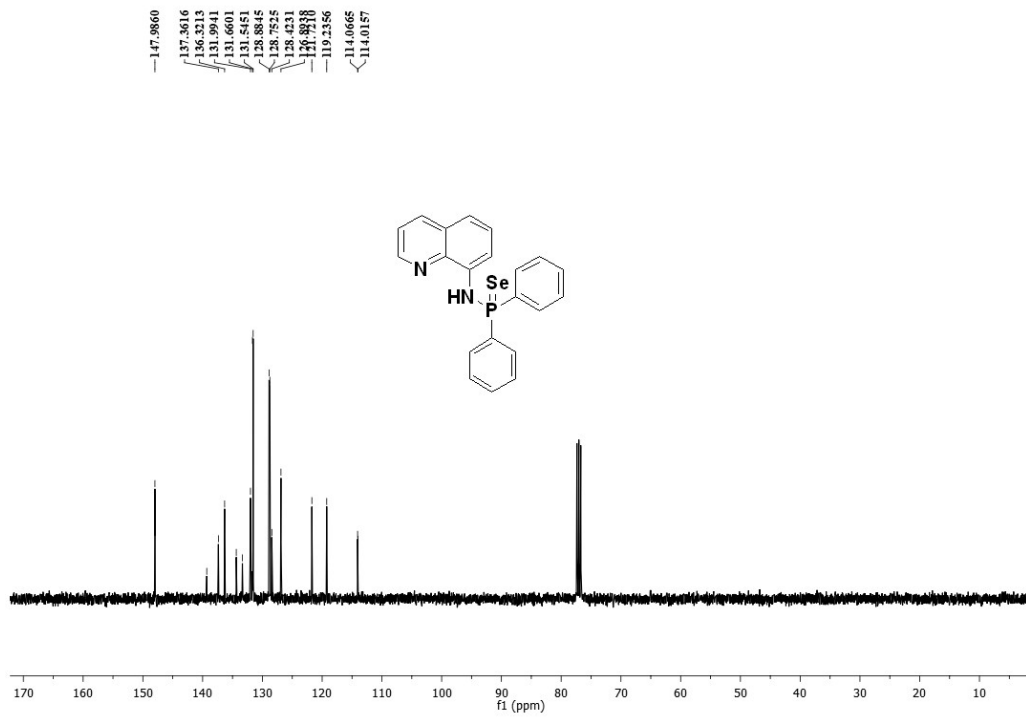

Figure FS5.  $^{13}\text{C}$  NMR spectra of complex **1b**.

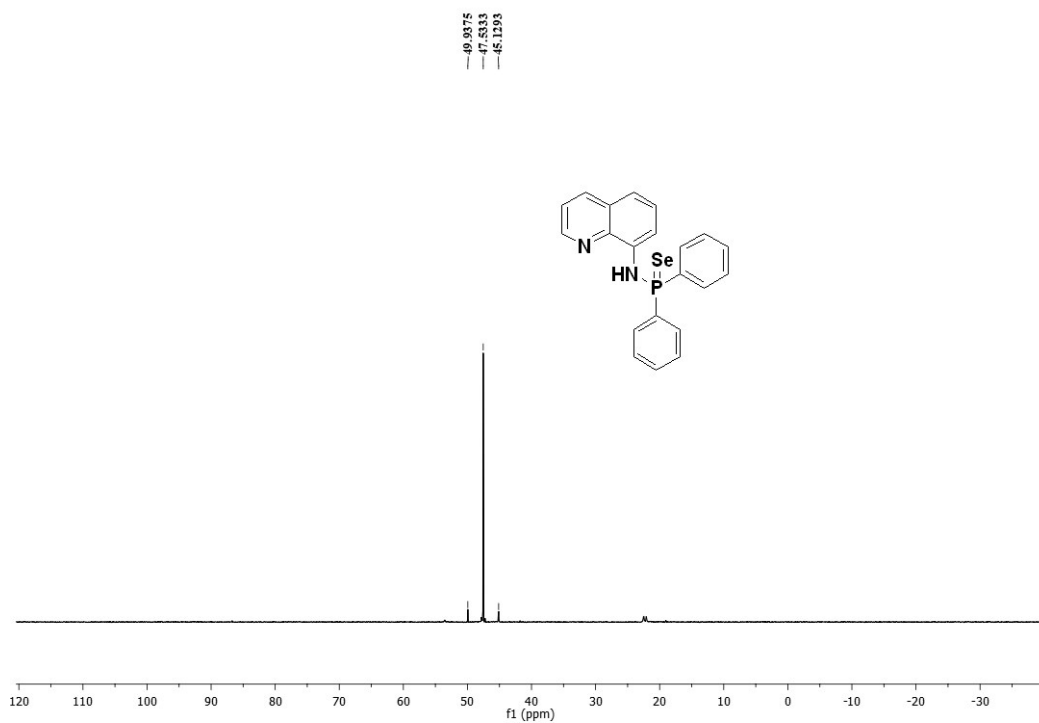

Figure FS6.  $^{13}\text{P}$  NMR spectra of complex **1b**.

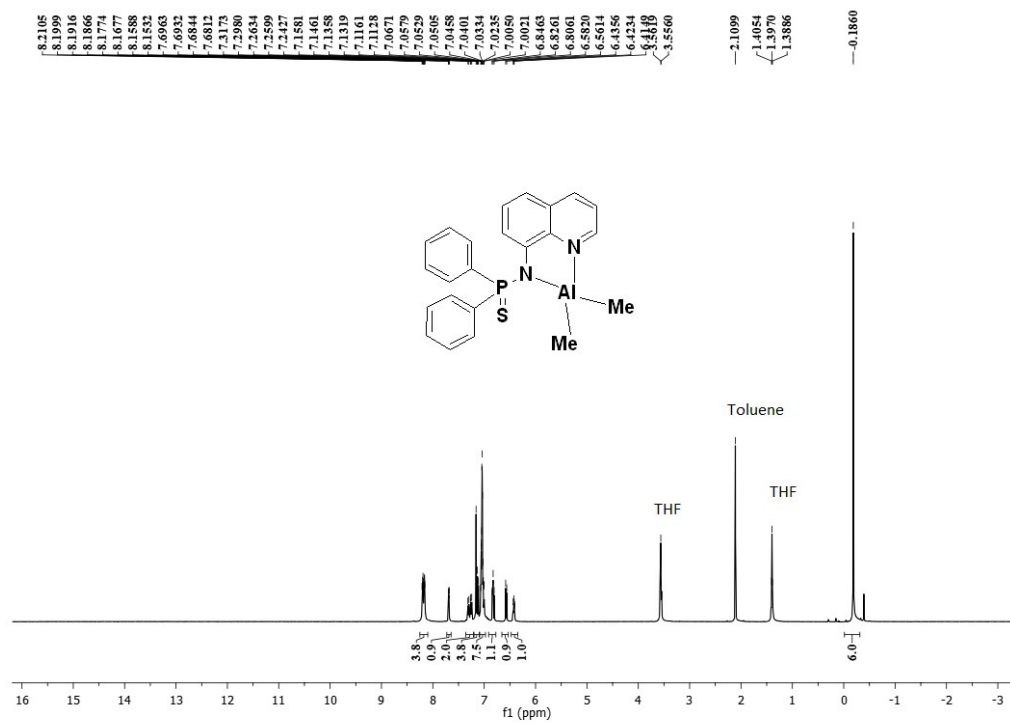

Figure FS7. <sup>1</sup>H NMR spectra of complex **2a**.

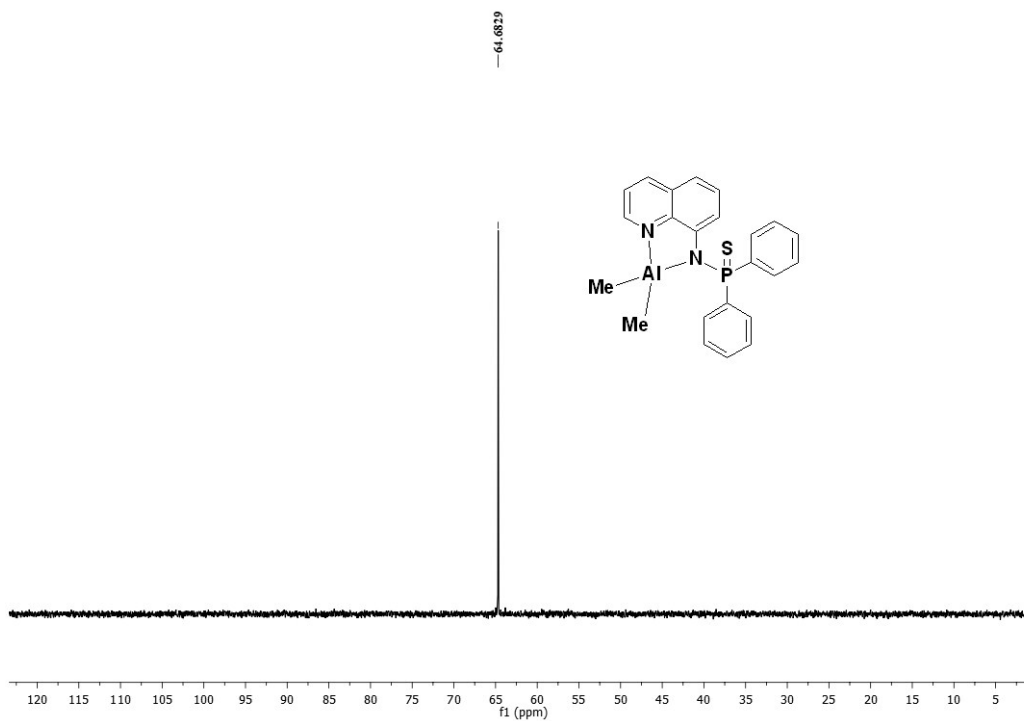

Figure FS8. <sup>13</sup>P NMR spectra of complex **2a**.

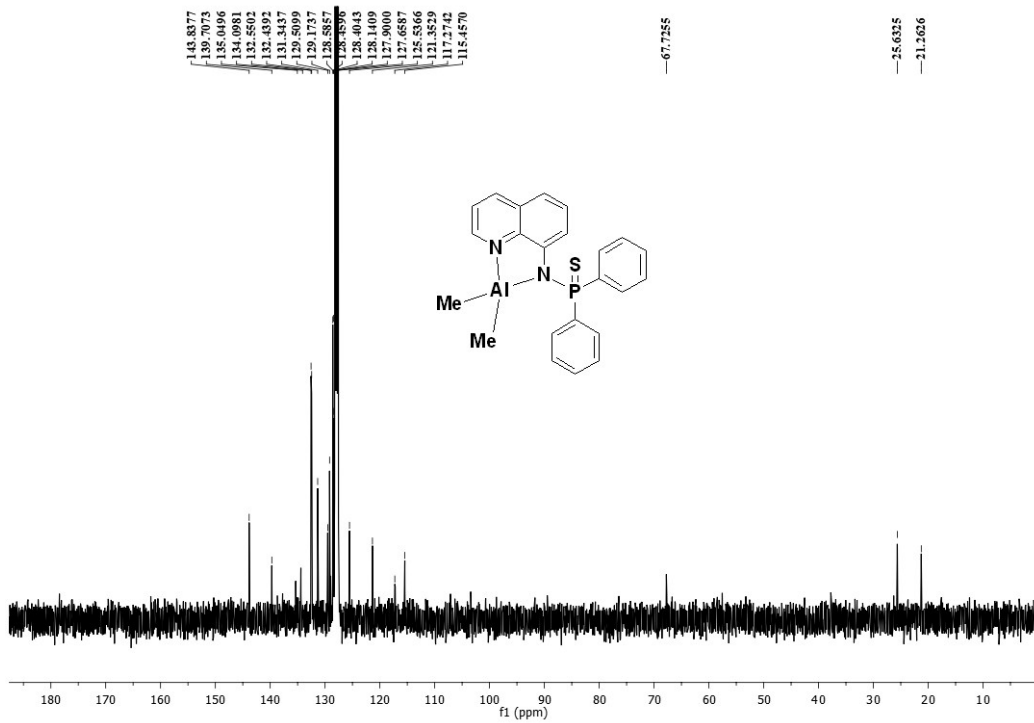

Figure FS9. <sup>13</sup>C NMR spectra of complex 2a.

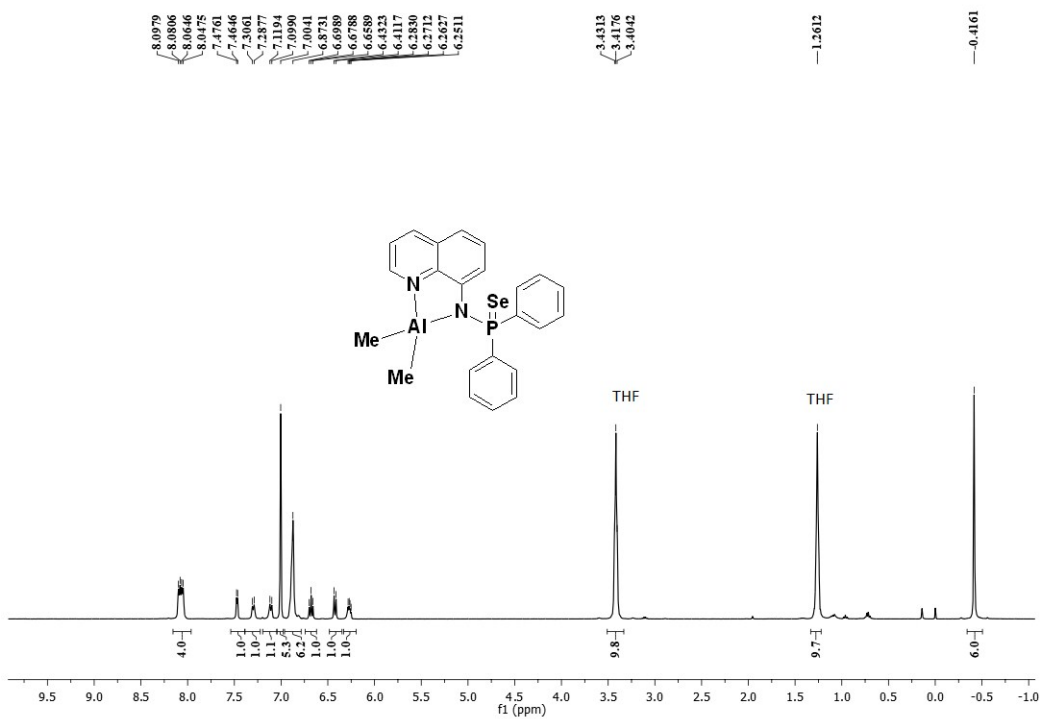

Figure FS10. <sup>1</sup>H NMR spectra of complex 2b.



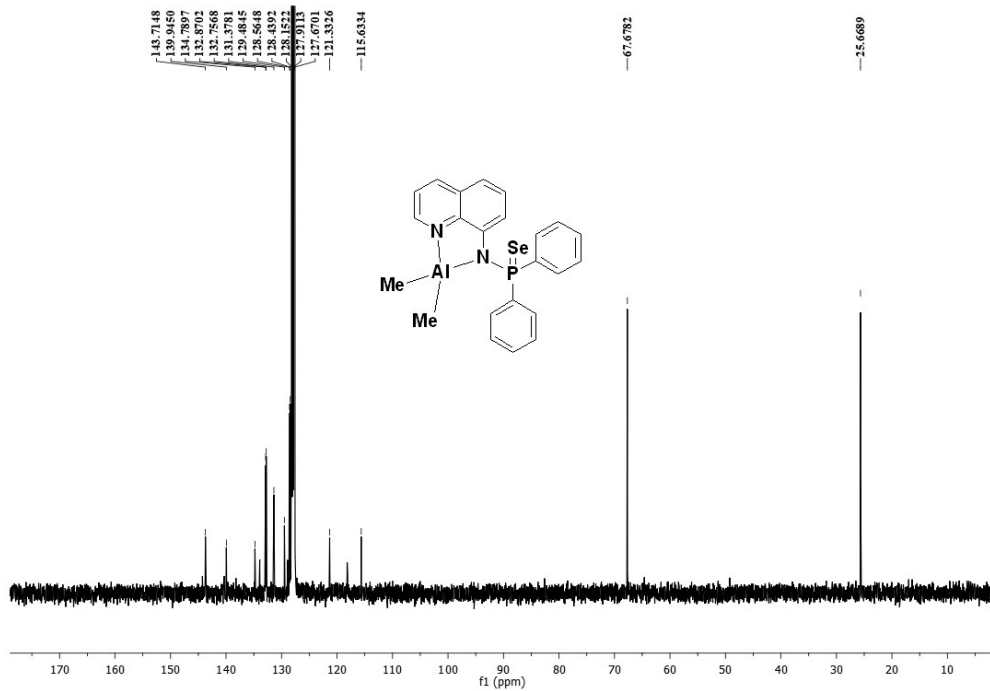

Figure FS11.  $^{13}\text{C}$  NMR spectra of complex 2b.

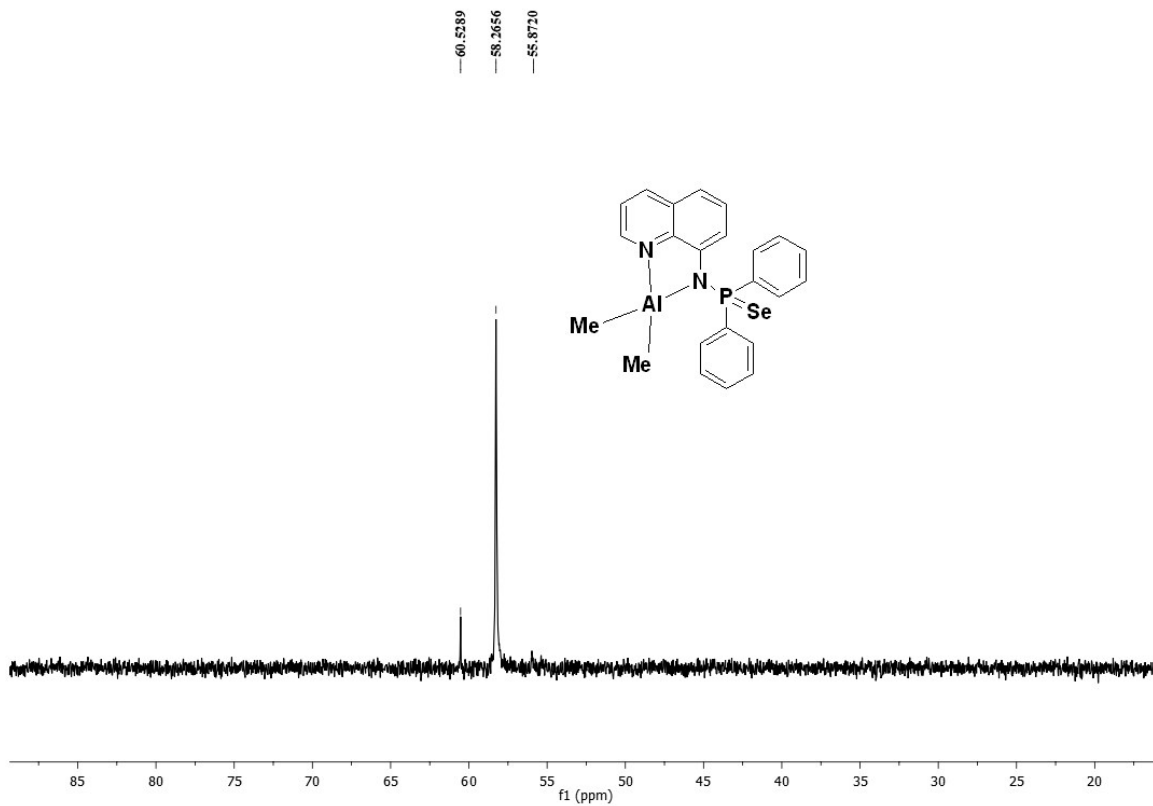

Figure FS12.  $^{13}\text{P}$  NMR spectra of complex 2b.

## Catalytic aluminium complex as an efficient catalyst for selective reduction of amides to amines

### Characterisation Data: (reduction of amides to amines).

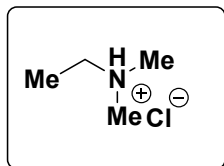

Isolated yield (**3a**) (39.6 mg, 96%).  $^1\text{H}$  NMR (400 MHz,  $\text{D}_2\text{O}$ ):  $\delta$  3.13 - 3.07 (q, 2H,  $\text{CH}_2$ ), 2.78 (s, 6H,  $\text{CH}_3$ ), 2.64 (s, 1H,  $\text{NH}$ ), 1.24 - 1.20 (t, 3H,  $\text{CH}_3$ ) ppm.  $^{13}\text{C}$  NMR (100 MHz,  $\text{D}_2\text{O}$ ):  $\delta$  83.7, 75.5, 38.3, 35.6, 34.5, 23.7, 19.9 ppm.

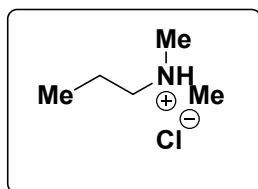

Isolated yield (**3b**) (46.2 mg, 94%).  $^1\text{H}$  NMR (400 MHz,  $\text{D}_2\text{O}$ ):  $\delta$  2.91 (s, 1H,  $\text{CH}_2$ ), 2.83 (s, 1H,  $\text{CH}_2$ ), 2.63 (s, 2H,  $\text{CH}_2$ ), 2.35-2.30 (s, 2H,  $\text{CH}_2$ ), 1.29 - 1.27 (d, 6H,  $\text{CH}_3$ ) ppm.  $^{13}\text{C}$  NMR (100 MHz,  $\text{D}_2\text{O}$ ):  $\delta$  83.9, 75.6, 37.4, 35.4, 34.6, 26.2, 23.8, 8.8 ppm.

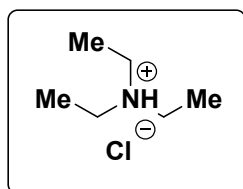

Isolated yield (**3c**) (51.4 mg, 90%).  $^1\text{H}$  NMR (400 MHz,  $\text{D}_2\text{O}$ ):  $\delta$  3.27 - 3.16 (m, 6H,  $\text{CH}_2$ ), 1.96 (s, 1H,  $\text{NH}$ ), 0.94 - 0.91 (s, 1H,  $\text{CH}_3$ ) ppm.  $^{13}\text{C}$  NMR (100 MHz,  $\text{D}_2\text{O}$ ):  $\delta$  83.9, 75.6, 37.4, 35.4, 34.6, 26.2, 23.8, 8.8 ppm.

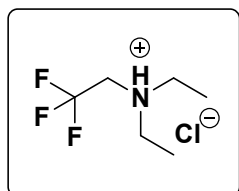

Isolated yield (**3d**) (63.1 mg, 88%).  $^1\text{H}$  NMR (400 MHz,  $\text{D}_2\text{O}$ ):  $\delta$  3.06 (s, 2H,  $\text{CH}_2$ ), 1.69 – 1.63 (m, 2H,  $\text{CH}_2$ ), 1.57- 1.53 (m, 3H,  $\text{CH}_3$ ) ppm.  $^{13}\text{C}$  NMR (100 MHz,  $\text{D}_2\text{O}$ ):  $\delta$  75.6, 44.7, 23.9, 22.2, 21.5, ppm.  $^{19}\text{F}$  NMR (376 MHz,  $\text{D}_2\text{O}$ ):  $\delta$  – 64.8 ppm.

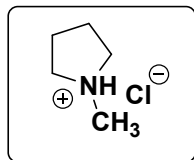

Isolated yield (**3e**) (44.2 mg, 92%).  $^1\text{H}$  NMR (400 MHz,  $\text{D}_2\text{O}$ ):  $\delta$  3.33 – 3.30 (m, 2H,  $\text{CH}_2$ ), 2.64 (s, 3H,  $\text{CH}_3$ ), 2.26 – 2.22 (m, 2H,  $\text{CH}_2$ ), 1.89 – 1.83 (m, 2H,  $\text{CH}_2$ ) ppm.  $^{13}\text{C}$  NMR (100 MHz,  $\text{D}_2\text{O}$ ):  $\delta$  75.5, 50.2, 30.6, 29.4, 23.7, 16.8 ppm.

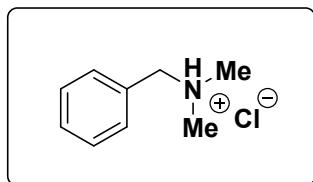

Isolated yield (**3f**) (70.2 mg, 92%).  $^1\text{H}$  NMR (400 MHz,  $\text{D}_2\text{O}$ ):  $\delta$  7.41 - 7.35 (m, 5H,  $\text{ArH}$ ), 4.24 (s, 2H,  $\text{CH}_2$ ), 3.03 - 2.65 (m, 1H,  $\text{NH}$ ), 1.14 (s, 6H,  $\text{CH}_3$ ) ppm.  $^{13}\text{C}$  NMR (100 MHz,  $\text{D}_2\text{O}$ ):  $\delta$  130.8, 130.1, 129.3, 128.6, 126.6, 75.6, 42.1, 39.6, 35.2, 34.5, ppm.

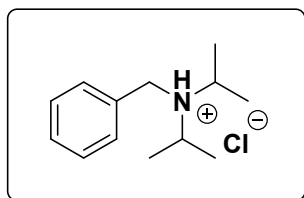

Isolated yield (**3g**) (101.5 mg, 964%).  $^1\text{H}$  NMR (400 MHz,  $\text{D}_2\text{O}$ ):  $\delta$  7.41 (s, 5H,  $\text{ArH}$ ), 4.21 (s, 2H,  $\text{CH}_2$ ), 3.73 – 3.67 (m, 2H,  $\text{CH}_2$ ), 1.35 - 1.33 (d, 6H,  $\text{CH}_3$ ), 1.12 (s, 6H,  $\text{N}(\text{CH}_3)_2$ ), 1.01- 0.97(m, 3H,  $\text{CH}_3$ ) ppm.  $^{13}\text{C}$  NMR (100 MHz,  $\text{D}_2\text{O}$ ):  $\delta$  130.6, 130.4, 129.6, 129.2, 75.6, 54.6, 50.1, 23.8, 18.0, 17.2 ppm.

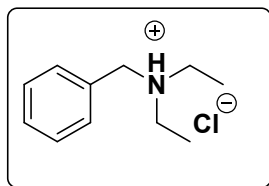

Isolated yield (**3h**) (88.4 mg, 96%).  $^1\text{H}$  NMR (400 MHz,  $\text{D}_2\text{O}$ ):  $\delta$  7.41 - 7.36 (m, 5H, ArH), 4.18 (s, 2H,  $\text{CH}_2$ ), 3.12-3.02 (q, 4H,  $\text{CH}_2$ ), 1.21 - 1.17 (t, 1H,  $\text{CH}_3$ ) ppm.  $^{13}\text{C}$  NMR (100 MHz,  $\text{D}_2\text{O}$ ):  $\delta$  130.7, 130.0, 129.3, 129.1, 83.9, 75.6, 55.8, 46.7, 23.7, 8.1 ppm.

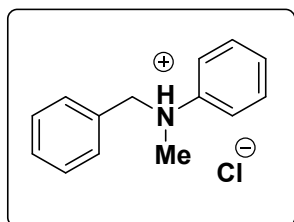

Isolated yield (**3i**) (103.5 mg, 93%).  $^1\text{H}$  NMR (400 MHz,  $\text{D}_2\text{O}$ ):  $\delta$  7.46 - 7.41 (m, 1H, ArH), 7.37 - 7.35 (m, 2H, ArH), 7.29 - 7.25 (m, 2H, ArH), 7.22 - 7.18 (m, 2H, ArH), 7.11 - 7.09 (m, 2H, ArH), 4.5 (s, 2H,  $\text{CH}_2$ ), 3.17 (s, 3H,  $\text{CH}_3$ ), 2.91 (s, 1H, NH) ppm.  $^{13}\text{C}$  NMR (100 MHz,  $\text{D}_2\text{O}$ ):  $\delta$  139.2, 130.9, 130.3, 130.0, 129.9, 128.9, 121.7, 121.4, 75.6, 63.8, 44.0, 36.9, 23.8 ppm.

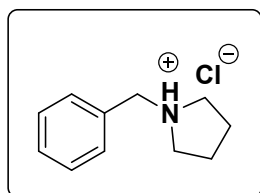

Isolated yield (**3j**) (81.9 mg, 90%).  $^1\text{H}$  NMR (400 MHz,  $\text{D}_2\text{O}$ ):  $\delta$  7.45 - 7.40 (m, 2H, ArH), 7.32 - 7.31 (m, 2H, ArH), 7.23 - 7.21 (m, 1H, ArH), 3.50 (s, 2H,  $\text{CH}_2$ ), 2.86 - 2.83 (m, 2H,  $\text{CH}_2$ ), 1.71 - 1.47 (m, 2H,  $\text{CH}_2$ ) ppm.  $^{13}\text{C}$  NMR (100 MHz,  $\text{D}_2\text{O}$ ):  $\delta$  133.8, 130.7, 129.8, 129.2, 122.9, 55.5, 47.6, 27.3, 23.7, 20.5 ppm.

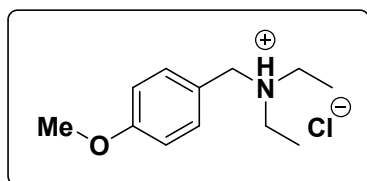

Isolated yield (**3k**) (97.1 mg, 89%).  $^1\text{H}$  NMR (400 MHz,  $\text{D}_2\text{O}$ ):  $\delta$  7.26 - 7.24 (d,  $J$  = 8.6 Hz 1H, ArH), 6.95 - 6.92 (d,  $J$  = 8.67 Hz 1H, ArH), 4.22 (s, 2H,  $\text{CH}_2$ ), 3.83 (s, 3H,  $\text{OCH}_3$ ), 3.48 - 3.45 (q, 2H,  $\text{CH}_3$ ), 3.28 - 3.15 (q, 2H,  $\text{CH}_3$ ), 1.13 - 1.02 (t, 3H,  $\text{CH}_3$ ) ppm.  $^{13}\text{C}$  NMR (100 MHz,  $\text{D}_2\text{O}$ ):  $\delta$  159.9, 128.3, 127.9, 114.0, 75.6, 55.5, 44.4, 40.1, 23.9, 19.8, 13.6, 12.3 ppm.

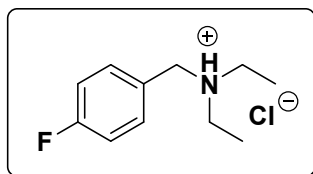

Isolated yield (**3l**) (83.8 mg, 82%).  $^1\text{H}$  NMR (400 MHz,  $\text{D}_2\text{O}$ ):  $\delta$  7.38 - 7.34 (m, Hz 2H, ArH), 7.19 - 7.15 (m, 2H, ArH), 4.25 (s, 2H,  $\text{CH}_2$ ), 3.46 - 3.45 (q, 2H,  $\text{CH}_3$ ), 3.23 - 3.21 (q, 2H,  $\text{CH}_3$ ), 1.321-1.34 (t, 3H,  $\text{CH}_3$ ), 1.06 - 1.00 (t, 3H,  $\text{CH}_3$ ) ppm.  $^{13}\text{C}$  NMR (100 MHz,  $\text{D}_2\text{O}$ ):  $\delta$  133.3, 128.1, 116.3, 115.8, 83.9, 75.6, 55.1, 46.7, 42.3 23.7, 13.2, 12.1 ppm.

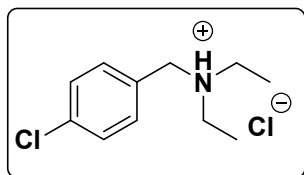

Isolated yield (**3m**) (93.5 mg, 84%).  $^1\text{H}$  NMR (400 MHz,  $\text{D}_2\text{O}$ ):  $\delta$  7.61 - 7.59 (m, Hz 2H, ArH), 7.34 - 7.32 (m, 2H, ArH), 4.22 (s, 2H,  $\text{CH}_2$ ), 3.15 - 3.10 (q, 2H,  $\text{CH}_3$ ), 3.09 - 2.98 (q, 2H,  $\text{CH}_3$ ), 1.25 - 1.17 (t, 3H,  $\text{CH}_3$ ) ppm.  $^{13}\text{C}$  NMR (100 MHz,  $\text{D}_2\text{O}$ ):  $\delta$  132.4, 129.4, 128.9, 127.6, 75.7, 46.8, 23.8, 8.2 ppm.

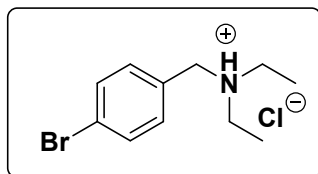

Isolated yield (**3n**) (116.2 mg, 85%).  $^1\text{H}$  NMR (400 MHz,  $\text{D}_2\text{O}$ ):  $\delta$  7.54 - 7.51 (m, Hz, 2H, ArH), 7.26 - 7.24 (m, 1H, ArH), 7.17 - 7.15 (m, 1H, ArH), 4.15 (s, 2H,  $\text{CH}_2$ ), 3.37 - 3.36 (q, 3H,  $\text{CH}_3$ ), 3.13 - 3.02 (q, 3H,  $\text{CH}_3$ ), 1.13 - 1.07 (q, 3H,  $\text{CH}_3$ ) ppm.  $^{13}\text{C}$  NMR (100 MHz,  $\text{D}_2\text{O}$ ):  $\delta$  133.3, 128.1, 116.3, 115.8, 83.9, 75.6, 55.1, 46.7, 42.3 23.7, 13.2, 12.1 ppm.

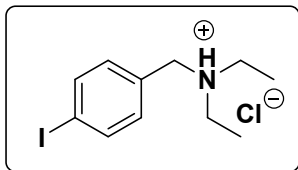

Isolated yield (**3o**) (142.0 mg, 87%).  $^1\text{H}$  NMR (400 MHz,  $\text{D}_2\text{O}$ ):  $\delta$  7.36 - 7.32 (m, Hz, 2H, ArH), 7.16 - 7.12 (m, 2H, ArH), 4.14 (s, 2H,  $\text{CH}_2$ ), 3.46 - 3.41 (q, 3H,  $\text{CH}_3$ ), 3.23 - 3.12 (q, 3H,  $\text{CH}_3$ ), 1.12 - 1.17 (t, 3H,  $\text{CH}_3$ ) 1.03 - 1.00 (t, 3H,  $\text{CH}_3$ ) ppm.  $^{13}\text{C}$  NMR (100 MHz,  $\text{D}_2\text{O}$ ):  $\delta$  131.8, 128.1, 115.8, 115.6, 75.7, 44.4, 42.3, 40.2, 23.7, 13.2, 12.1, 10.5 ppm.

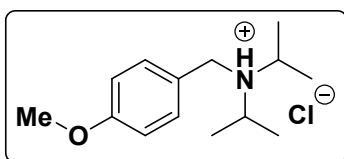

Isolated yield (**3p**) (117.4 mg, 94%).  $^1\text{H}$  NMR (400 MHz,  $\text{D}_2\text{O}$ ):  $\delta$  7.31 - 7.29 (d,  $J = 8.6$  Hz, 1H, ArH), 7.18 - 7.16 (d,  $J = 8.6$  Hz 1H, ArH), 6.90 - 6.88 (d,  $J = 8.6$  Hz 1H, ArH), 4.12 (s, 2H,  $\text{CH}_2$ ), 3.70 - 3.63 (s, 3H,  $\text{OCH}_3$ ), 3.62 - 3.57 (m, 2H,  $\text{CH}_3$ ) 1.28 - 1.26 (d, 6H,  $\text{CH}_3$ ), 1.22 - 1.21 (d, 6H,  $\text{CH}_3$ ) ppm.  $^{13}\text{C}$  NMR (100 MHz,  $\text{D}_2\text{O}$ ):  $\delta$  159.6, 132.1, 127.3, 122.8, 114.6, 83.4, 75.6, 55.5, 54.2, 49.6, 23.9, 19.8, 18.05, 17.3 ppm.

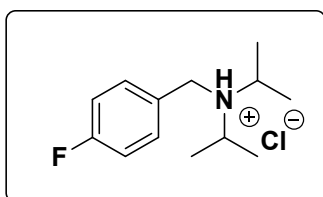

Isolated yield (**3q**) (100.4 mg, 85%).  $^1\text{H}$  NMR (400 MHz,  $\text{D}_2\text{O}$ ):  $\delta$  7.51 - 7.49 (d,  $J = 8.3$  Hz, 2H, ArH), 7.26 - 7.24 (d,  $J = 8.3$  Hz 2H, ArH), 4.16 (s, 2H,  $\text{CH}_2$ ), 3.65 - 3.62 (t, 2H,  $\text{CH}_3$ ) ppm.  $^{13}\text{C}$  NMR (100 MHz,  $\text{D}_2\text{O}$ ):  $\delta$  132.3, 132.1, 129.3, 123.1, 83.9, 75.6, 54.8, 46.7, 23.7, 17.6 ppm.

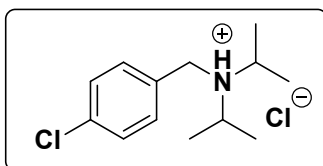

Isolated yield (**3r**) (111.9 mg, 88%).  $^1\text{H}$  NMR (400 MHz, DMSO- $d_6$ ):  $\delta$  9.19 (s, 1H, NH), 7.07 – 7.67 (m, 2H, ArH), 7.25 – 7.20 (m, 2H, ArH), 4.32 (s, 2H,  $\text{CH}_2$ ), 3.63 - 3.61 (m, 2H,  $\text{CH}_2$ ), 1.35 – 1.33 (d, 6H,  $\text{CH}_3$ ) 1.31 – 1.29 (d, 6H,  $\text{CH}_3$ ) ppm.  $^{13}\text{C}$  NMR (100 MHz, DMSO- $d_6$ ):  $\delta$  163.4, 161.0, 133.1, 127.1, 115.5, 115.3, 81.4, 54.1, 48.8, 24.3, 20.2, 18.2, 17.3 ppm.

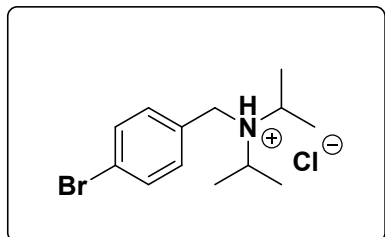

Isolated yield (**3s**) (135.2 mg, 89%).  $^1\text{H}$  NMR (400 MHz,  $\text{D}_2\text{O}$ ):  $\delta$  7.57 - 7.55 (d,  $J = 8.4$  Hz, 2H, ArH), 7.34 - 7.32 (d,  $J = 8.4$  Hz, 2H, ArH), 4.22 (s, 2H,  $\text{CH}_2$ ), 3.57 – 3.68 (m, 2H, CH), 1.36 - 1.34 (d, 6H,  $\text{CH}_3$ ), 1.30 - 1.28 (d, 6H,  $\text{CH}_3$ ) ppm.  $^{13}\text{C}$  NMR (100 MHz,  $\text{D}_2\text{O}$ ):  $\delta$  132.2, 131.5, 129.7, 129.1, 123.3, 83.9, 75.6, 54.6, 49.4, 23.7, 17.9, 17.1 ppm.

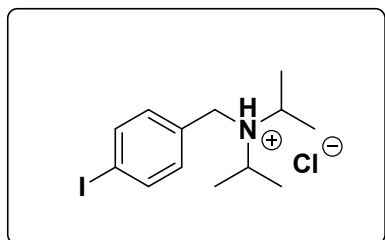

Isolated yield (**3t**) (163.2 mg, 90%).  $^1\text{H}$  NMR (400 MHz,  $\text{D}_2\text{O}$ ):  $\delta$  7.83 - 7.81 (d,  $J = 8$  Hz, 2H, ArH), 7.24 - 7.22 (d,  $J = 8$  Hz, 2H, ArH), 4.27 (s, 2H,  $\text{CH}_2$ ), 3.77 – 3.37 (m, 1H, CH), 3.18 - 3.13 (m, 1H, CH), 1.33 - 1.29 (d, 6H,  $\text{CH}_3$ ) 1.26 - 1.22 (d, 6H,  $\text{CH}_3$ ) ppm.  $^{13}\text{C}$  NMR (100 MHz,  $\text{D}_2\text{O}$ ):  $\delta$  140.8, 134.9, 78.2, 57.2, 26.3, 20.9, 10.9 ppm.

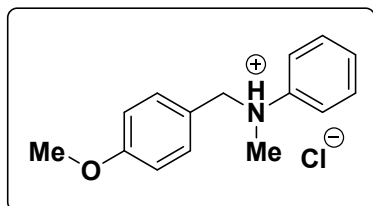

Isolated yield (**3u**) (141.4 mg, 95%).  $^1\text{H}$  NMR (400 MHz,  $\text{D}_2\text{O}$ ):  $\delta$  7.52 - 7.46 (m, 6H, ArH), 7.06 – 7.03 (d,  $J = 8.6$  Hz 1H, ArH), 6.76 – 6.74 (d,  $J = 8.67$  Hz 1H, ArH), 4.7 (s, 2H,  $\text{CH}_2$ ), 3.64 (s,

3H, OCH<sub>3</sub>), 2.94 (s, 3H, CH<sub>3</sub>) ppm. <sup>13</sup>C NMR (100 MHz, D<sub>2</sub>O): δ 159.6, 132.1, 127.3, 122.8, 114.6, 83.4, 75.6, 55.5, 54.2, 49.6, 23.9, 19.8, 18.05, 17.3 ppm.

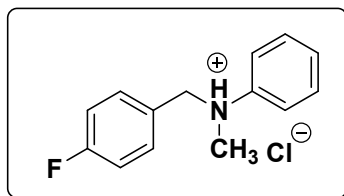

Isolated yield (**3v**) (110.4 mg, 86%). <sup>1</sup>H NMR (400 MHz, DMSO-d<sub>6</sub>): δ 7.51 - 7.45 (m, 4H, ArH), 7.44 - 7.42 (m, 1H, ArH), 7.28 - 7.26 (m, 1H, ArH), 7.14 - 7.10 (m, 1H, ArH), 7.01 - 6.99 (m, 1H, ArH), 3.34 (s, 2H, CH<sub>2</sub>), 2.91 (s, 3H, CH<sub>3</sub>) ppm. <sup>13</sup>C NMR (100 MHz, DMSO-d<sub>6</sub>): δ 137.3, 130.6, 128.3, 116.8, 122.0, 114.7, 81.9, 36.1, 24.3 ppm.

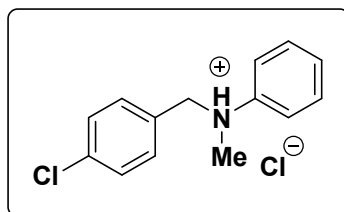

Isolated yield (**3w**) (133.2 mg, 89%). <sup>1</sup>H NMR (400 MHz, D<sub>2</sub>O): δ 7.44 - 7.41 (m, 3H, ArH), 7.36 - 7.34 (m, 3H, ArH), 7.25 - 7.16 (m, 1H, ArH), 7.02 - 7.0 (m, 1H, ArH), 3.23 (s, 2H, CH<sub>2</sub>), 2.96 (s, 3H, CH<sub>3</sub>) ppm. <sup>13</sup>C NMR (100 MHz, D<sub>2</sub>O): δ 136.3, 132.4, 130.4, 129.7, 121.7, 75.6, 63.0, 43.9, 36.9, 23.7 ppm.

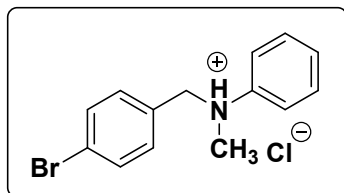

Isolated yield (**3x**) (128.2 mg, 90%). <sup>1</sup>H NMR (400 MHz, D<sub>2</sub>O): δ 7.43 - 7.40 (m, 3H, ArH), 7.35 - 7.32 (m, 3H, ArH), 7.22 - 7.21 (m, 1H, ArH), 6.94 - 6.92 (m, 1H, ArH), 3.22 (s, 2H, CH<sub>2</sub>), 2.94 (s, 3H, CH<sub>3</sub>) ppm. <sup>13</sup>C NMR (100 MHz, D<sub>2</sub>O): δ 130.3, 129.8, 121.7, 83.9, 75.6, 36.9, 23.7 ppm.



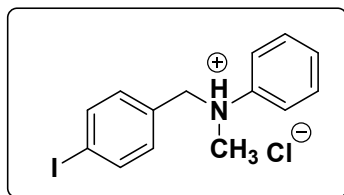

Isolated yield (**3y**) (142.3 mg, 92%).  $^1\text{H}$  NMR (400 MHz,  $\text{D}_2\text{O}$ ):  $\delta$  7.46 - 7.41 (m, 3H, ArH), 7.36 - 7.34 (m, 3H, ArH), 7.25 - 7.23 (m, 1H, ArH), 7.18 - 7.16 (m, 1H, ArH), 7.02 - 7.00 (m, 1H, ArH), 3.23 (s, 2H,  $\text{CH}_2$ ), 2.96 (s, 3H,  $\text{CH}_3$ ) ppm.  $^{13}\text{C}$  NMR (100 MHz,  $\text{D}_2\text{O}$ ):  $\delta$  132.6, 131.9, 130.6, 129.8, 121.7, 121.4, 75.4, 36.8, 23.7 ppm.

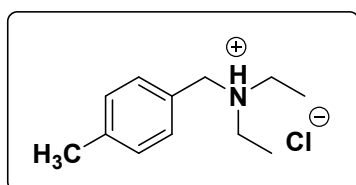

Isolated yield (**3z**) (136.2 mg, 90%).  $^1\text{H}$  NMR (400 MHz,  $\text{D}_2\text{O}$ ):  $\delta$  7.20 - 7.09 (m, 4H, ArH), 4.09 (s, 2H,  $\text{CH}_2$ ), 3.35 - 3.31 (q, 2H,  $\text{CH}_3$ ), 3.11 - 3.08 (q, 2H,  $\text{CH}_3$ ), 2.20 (s, 3H,  $\text{CH}_3$ ), 1.20 - 1.13 (t, 3H,  $\text{CH}_3$ ), 0.94 - 0.89 (t, 3H,  $\text{CH}_3$ ) ppm.  $^{13}\text{C}$  NMR (100 MHz,  $\text{D}_2\text{O}$ ):  $\delta$  140.3, 132.7, 129.9, 125.9, 83.0, 75.6, 46.6, 44.3, 40.0, 23.9, 20.5, 13.6, 12.3 ppm.

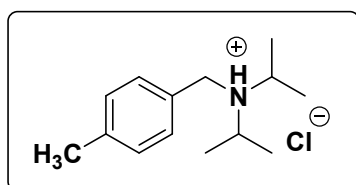

Isolated yield (**3za**) (145.6 mg, 94%).  $^1\text{H}$  NMR (400 MHz,  $\text{D}_2\text{O}$ ):  $\delta$  7.27 - 7.25 (d,  $J = 8.1$  Hz, 2H, ArH), 7.20 - 7.18 (d,  $J = 8.0$  Hz, 2H, ArH), 4.17 (s, 2H,  $\text{CH}_2$ ), 3.67 - 3.64 (m, 2H, CH), 2.23 (s, 3H,  $\text{CH}_3$ ), 1.31 - 1.29 (d,  $J = 6.7$  Hz, 6H  $\text{CH}_3$ ), 1.25 - 1.23 (d,  $J = 6.7$  Hz, 6H,  $\text{CH}_3$ ) ppm.  $^{13}\text{C}$  NMR (100 MHz,  $\text{D}_2\text{O}$ ):  $\delta$  140.3, 130.4, 129.7, 125.9, 83.9, 75.6, 54.6, 44.3, 40.0, 23.9, 20.3, 17.9, 17.2 ppm.

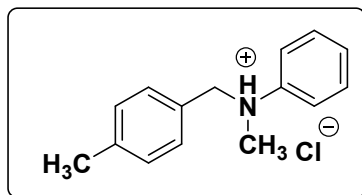

Isolated yield (**3zb**) (140.3 mg, 94%).  $^1\text{H}$  NMR (400 MHz,  $\text{D}_2\text{O}$ ):  $\delta$  7.46 - 7.42 (m, 2H, ArH), 7.39 - 7.35 (m, 3H, ArH), 7.27 - 7.25 (m, 1H, ArH), 7.01 - 6.94 (m, 4H, ArH), 3.22 (s, 2H,  $\text{CH}_2$ ), 2.97 (s, 3H,  $\text{CH}_3$ ), 2.12 (s, 3H,  $\text{CH}_3$ ) ppm.  $^{13}\text{C}$  NMR (100 MHz,  $\text{D}_2\text{O}$ ):  $\delta$  172.0, 130.5, 130.3, 129.5, 121.9, 121.6, 83.0, 75.6, 37.1, 23.9, 20.5 ppm.

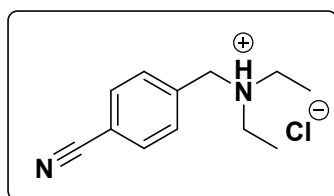

Isolated yield (**4a**) (91.3 mg, 86%).  $^1\text{H}$  NMR (400 MHz,  $\text{D}_2\text{O}$ ):  $\delta$  7.38 - 7.37 (d,  $J = 8.6$  Hz, 1H, ArH), 7.20 - 7.18 (d,  $J = 8.6$  Hz, 1H, ArH), 4.02 (s, 2H,  $\text{CH}_2$ ), 3.28 - 3.26 (q, 2H,  $\text{CH}_3$ ), 3.02 - 2.97 (q, 2H,  $\text{CH}_3$ ), 1.10 - 1.07 (t, 3H,  $\text{CH}_3$ ), 0.86 - 0.82 (t, 3H,  $\text{CH}_3$ ) ppm.  $^{13}\text{C}$  NMR (100 MHz,  $\text{D}_2\text{O}$ ):  $\delta$  172.3, 136.3, 134.0, 129.3, 126.9, 83.6, 75.6, 55.5, 44.4, 42.7, 40.1, 23.9, 13.6, 12.3 ppm.

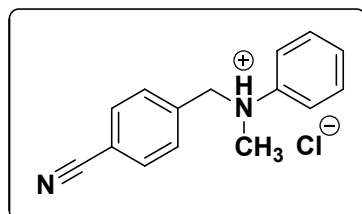

Isolated yield (**4b**) (125.4 mg, 88%).  $^1\text{H}$  NMR (400 MHz,  $\text{D}_2\text{O}$ ):  $\delta$  7.14 - 7.69 (d,  $J = 8.0$  Hz, 1H, ArH), 7.37 - 7.35 (d,  $J = 8.0$  Hz, 1H, ArH), 4.19 (s, 2H,  $\text{CH}_2$ ), 3.74 - 3.65 (s, 2H, CH), 1.44 - 1.43 (d,  $J = 6.8$  Hz, 6H,  $\text{CH}_3$ ), 1.11 - 1.09 (d,  $J = 6.8$  Hz, 6H,  $\text{CH}_3$ ) ppm.  $^{13}\text{C}$  NMR (100 MHz,  $\text{D}_2\text{O}$ ):  $\delta$  138.2, 133.6, 129.4, 126.0, 83.9, 75.7, 52.3, 46.1, 42.8, 23.9, 19.8 ppm.

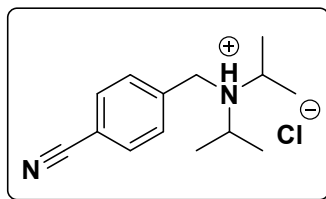

Isolated yield (**4c**) (107.6 mg, 90%).  $^1\text{H}$  NMR (400 MHz,  $\text{D}_2\text{O}$ ):  $\delta$  7.51 - 7.49 (d, 2H, ArH), 6.92 - 6.90 (d,  $J = 8.6$  Hz 1H, ArH), 4.37 (s, 2H,  $\text{CH}_2$ ), 3.74 (s, 2H,  $\text{CH}_2$ ), 2.97 (s, 3H,  $\text{CH}_3$ ) ppm.  $^{13}\text{C}$  NMR (100 MHz,  $\text{D}_2\text{O}$ ):  $\delta$  159.9, 128.3, 127.9, 114.0, 75.6, 55.5, 44.4, 40.1, 23.9, 19.8, 13.6, 12.3 ppm.

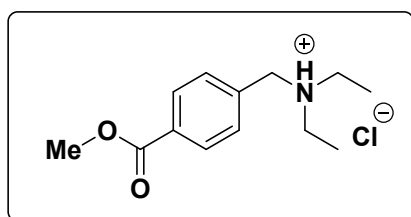

Isolated yield (**4d**) (124.9 mg, 88%).  $^1\text{H}$  NMR (400 MHz,  $\text{D}_2\text{O}$ ):  $\delta$  7.98 - 7.95 (d,  $J = 8.6$  Hz 1H, ArH), 7.39 - 7.37 (d,  $J = 7.8$  Hz 1H, ArH), 4.29 (s, 2H,  $\text{CH}_2$ ), 3.28 - 3.26 (q, 2H,  $\text{CH}_3$ ). 3.02 - 2.97 (q, 2H,  $\text{CH}_3$ ), 1.10 - 1.07 (t, 3H,  $\text{CH}_3$ ). 0.86 - 0.82 (t, 3H,  $\text{CH}_3$ ) ppm.  $^{13}\text{C}$  NMR (100 MHz,  $\text{D}_2\text{O}$ ):  $\delta$  169.9, 130.9, 130.4, 129.3, 126.1, 75.6, 63.3, 55.2, 52.7, 46.9, 44.1, 40.1, 23.9, 13.0, 11.9, 8.0 ppm.

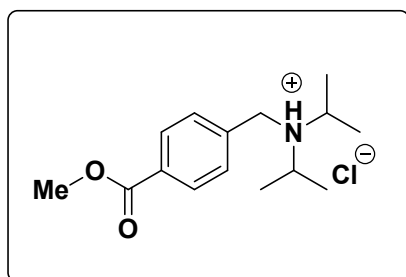

Isolated yield (**4e**) (126.6 mg, 90%).  $^1\text{H}$  NMR (400 MHz,  $\text{D}_2\text{O}$ ):  $\delta$  7.90 - 7.88 (m, 1H, ArH), 7.49 - 7.47 (m, 1H, ArH), 7.37 - 7.32 (m, 2H, ArH), 7.21 - 7.20 (m, 1H, ArH), 4.29 (s, 2H,  $\text{CH}_2$ ), 3.81 (s, 3H,  $\text{OCH}_3$ ), 3.69 - 3.67 (m, 1H, CH), 3.10 - 3.04 (m, 1H, CH), 1.35 - 1.31 (d,  $J = 6.7$  Hz, 6H,  $\text{CH}_3$ ), 1.26 - 1.24 (d,  $J = 6.6$  Hz, 6H,  $\text{CH}_3$ ) ppm.  $^{13}\text{C}$  NMR (100 MHz,  $\text{D}_2\text{O}$ ):  $\delta$  130.7, 130.4, 127.8, 125.3, 83.9, 75.6, 63.3, 54.9, 52.7, 46.9, 44.6, 23.9, 19.7, 17.9, 17.1 ppm.

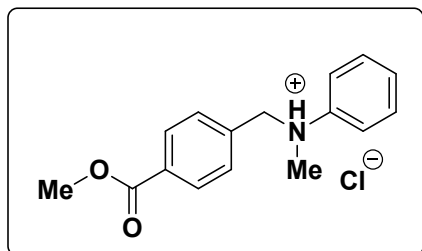

Isolated yield (**4f**) (135.4 mg, 94%).  $^1\text{H}$  NMR (400 MHz,  $\text{D}_2\text{O}$ ):  $\delta$  7.70 - 7.68 (d,  $J$  = 8.3 Hz 1H, ArH), 7.44 - 7.38 (m, 3H, ArH), 7.34 - 7.28 (m, 3H, ArH), 7.28 - 7.20 (m, 2H, ArH), 7.22 - 7.14 (m, 3H, ArH), 4.66 (s, 2H,  $\text{CH}_2$ ), 3.22 (s, 3H,  $\text{OCH}_3$ ), 2.97 (s, 3H,  $\text{CH}_3$ ) ppm.  $^{13}\text{C}$  NMR (100 MHz,  $\text{D}_2\text{O}$ ):  $\delta$  169.9, 142.5, 138.9, 136.4, 130.4, 129.3, 127.4, 126.1, 83.7, 75.6, 63.3, 57.2, 52.5, 46.9, 23.9, 8.4 ppm.

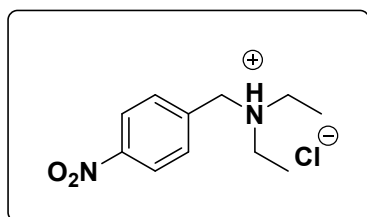

Isolated yield (**4g**) (94.05 mg, 80%).  $^1\text{H}$  NMR (400 MHz,  $\text{D}_2\text{O}$ ):  $\delta$  7.92 - 7.90 (d,  $J$  = 6.8 Hz, 2H, ArH), 7.24 - 7.12 (m, 2H, ArH), 4.10 (s, 2H,  $\text{CH}_2$ ), 3.16 - 3.11 (m, 2H,  $\text{CH}_2$ ), 2.90 - 2.85 (m, 2H,  $\text{CH}_2$ ), 0.86 - 0.81 (t, 3H,  $\text{CH}_3$ ), 0.72 - 0.69 (t, 3H,  $\text{CH}_3$ ) ppm.  $^{13}\text{C}$  NMR (100 MHz,  $\text{D}_2\text{O}$ ):  $\delta$  135.9, 130.3, 129.7, 121.7, 83.5, 75.4, 63.5, 44.3, 37.1, 23.9 ppm.

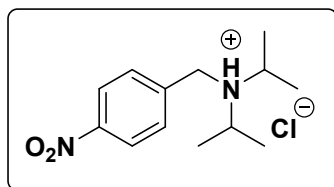

Isolated yield (**4h**) (112.05 mg, 84%).  $^1\text{H}$  NMR (400 MHz,  $\text{D}_2\text{O}$ ):  $\delta$  7.72 - 7.70 (d,  $J$  = 8.3 Hz 2H, ArH), 7.12 - 7.10 (d,  $J$  = 8 Hz 2H, ArH), 4.15 (s, 2H,  $\text{CH}_2$ ), 3.66 - 3.62 (m, 1H, CH), 3.06 - 3.01 (m, 1H, CH), 1.27 - 1.21 (d,  $J$  = 6.7 Hz 6H,  $\text{CH}_3$ ), 1.21 - 1.19 (d,  $J$  = 6.6 Hz 6H,  $\text{CH}_3$ ) ppm.  $^{13}\text{C}$  NMR (100 MHz,  $\text{D}_2\text{O}$ ):  $\delta$  137.2, 130.5, 126.9, 123.8, 83.4, 75.4, 52.7, 46.9, 23.9, 13.0, 19.7 ppm.

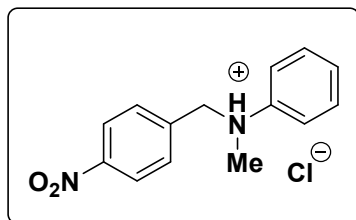

Isolated yield (**4i**) (117.6 mg, 86%).  $^1\text{H}$  NMR (400 MHz,  $\text{D}_2\text{O}$ ):  $\delta$  7.76 - 7.73 (d,  $J = 8.6$  Hz, 1H, ArH), 7.28 - 7.18 (m, 5H, ArH), 7.06 - 6.99 (m, 4H, ArH), 6.95 - 6.86 (m, 2H, ArH), 4.67 (s, 2H,  $\text{CH}_2$ ), 3.13 (s, 3H,  $\text{CH}_3$ ) ppm.  $^{13}\text{C}$  NMR (100 MHz,  $\text{D}_2\text{O}$ ):  $\delta$  147.9, 138.7, 135.0, 132.1, 130.3, 129.8, 126.8, 122.9, 121.7, 83.5, 75.4, 61.7, 45.1, 38.1, 37.0, 23.9 ppm.

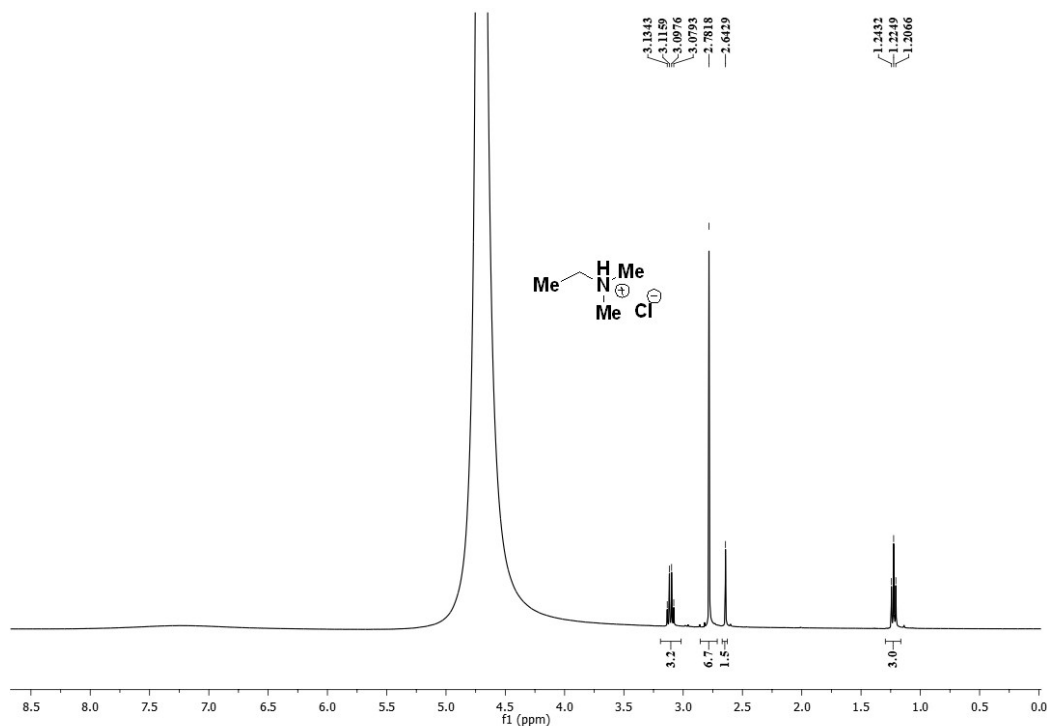

Figure FS13.  $^1\text{H}$  NMR spectra of compound (3a).

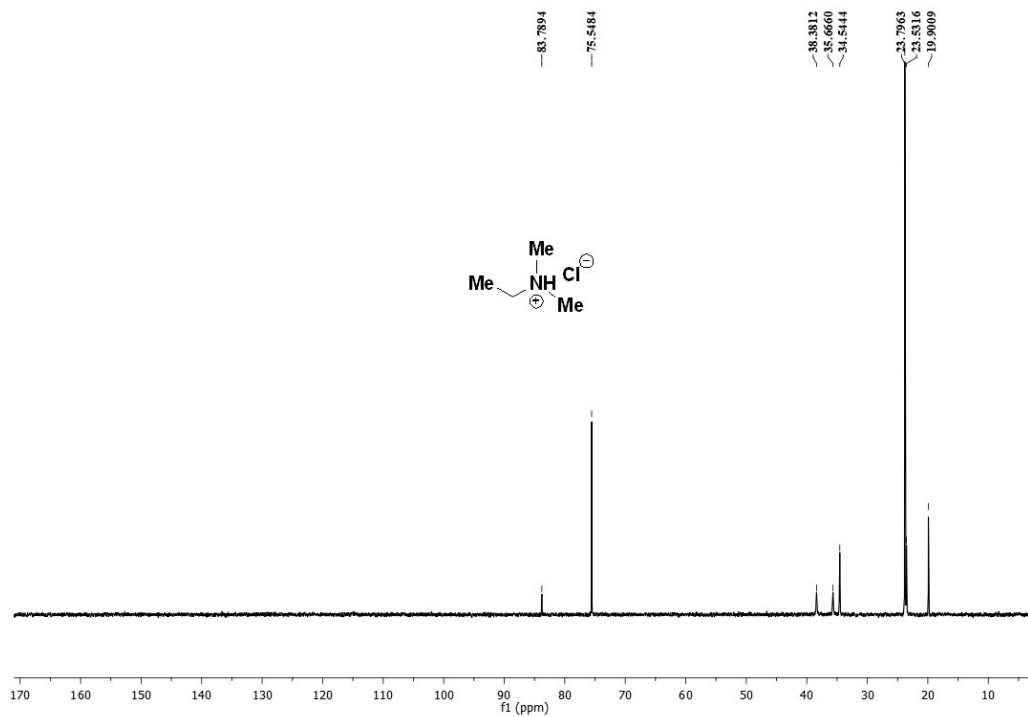

Figure FS14.  $^{13}\text{C}$  NMR spectra of compound (3a).

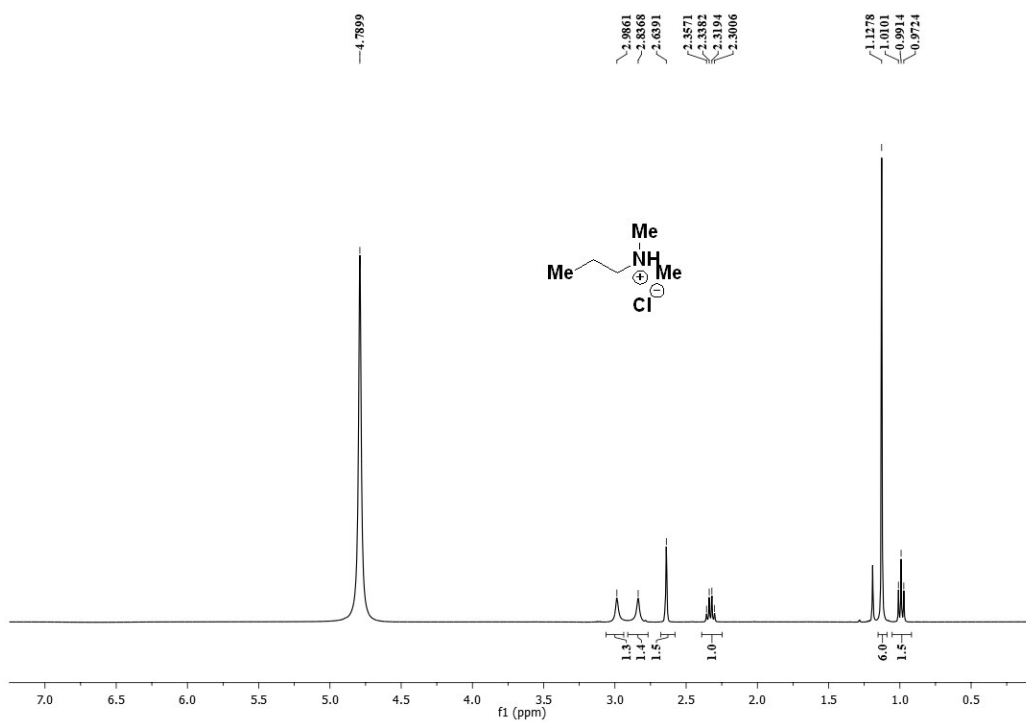

Figure FS15.  $^1\text{H}$  NMR spectra of compound (3b).

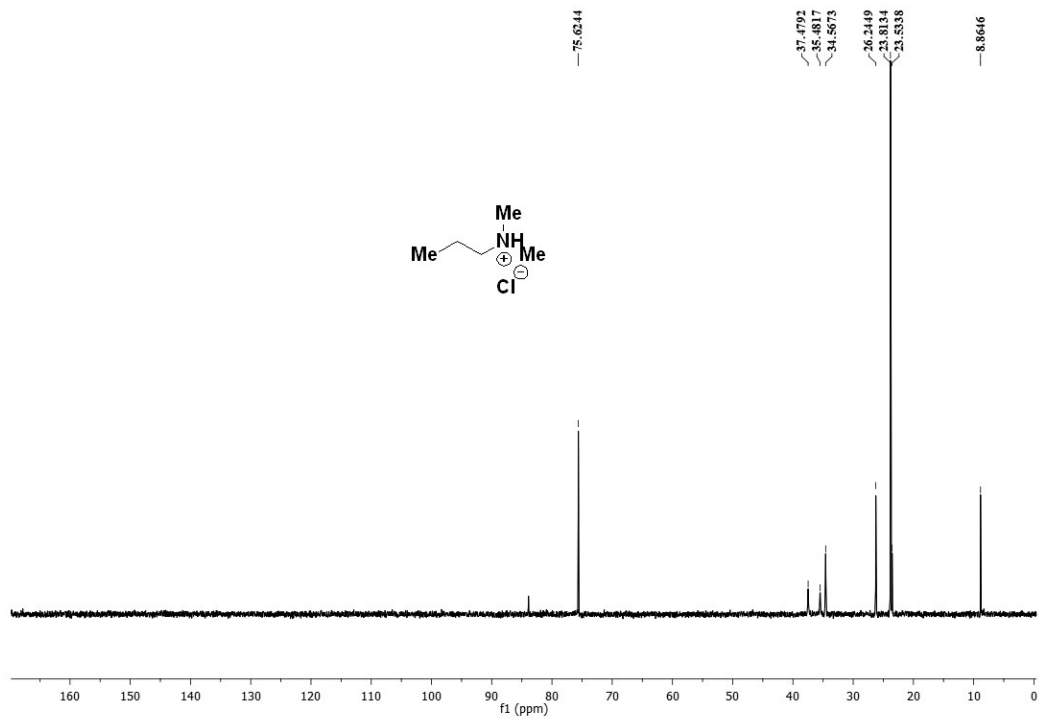

Figure FS16.  $^{13}\text{C}$  NMR spectra of compound (3b).

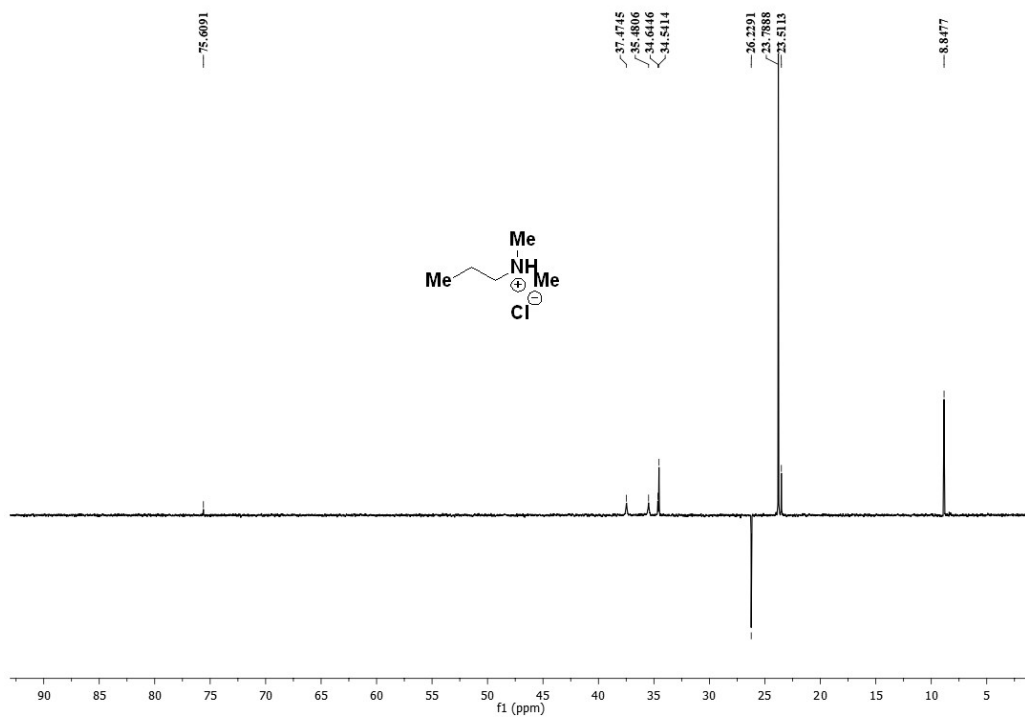

Figure FS17.  $^{13}\text{C}$  -DEPT NMR spectra of compound (3b).

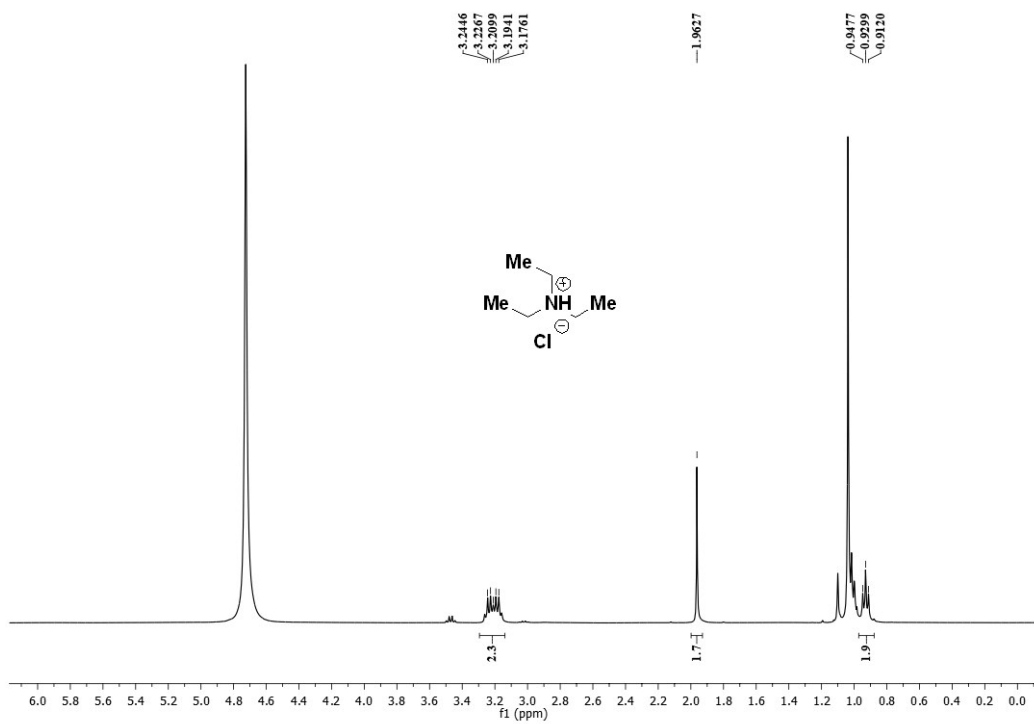

Figure FS18. <sup>1</sup>H NMR spectra of compound (3c).

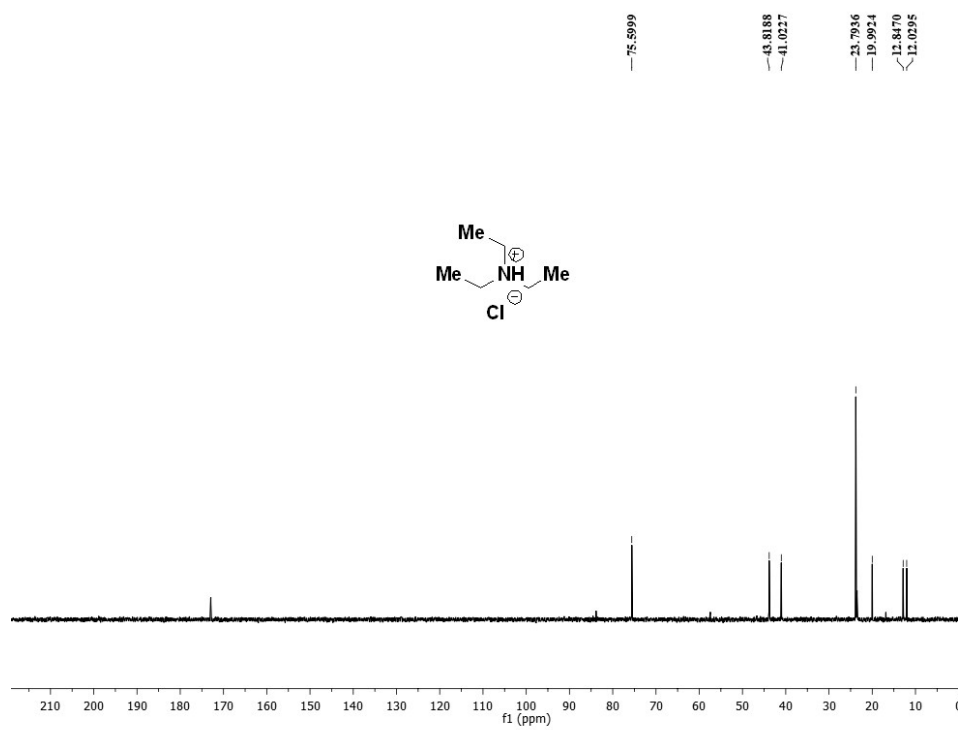

Figure FS19. <sup>13</sup>C NMR spectra of compound (3c).



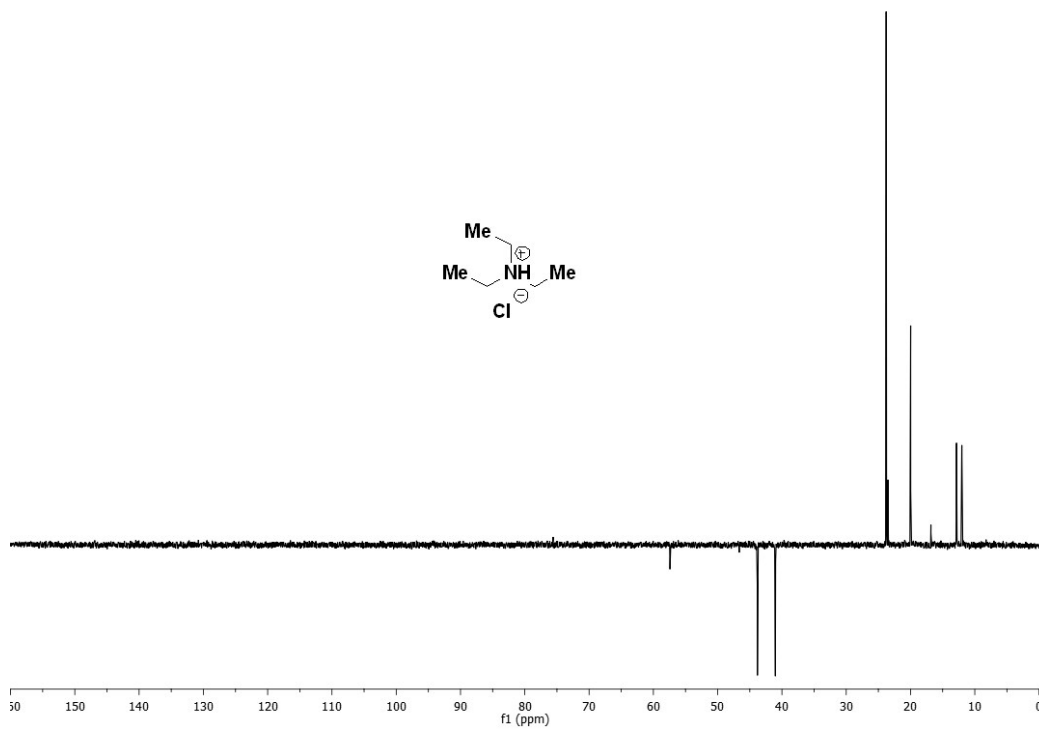

Figure FS20.  $^{13}\text{C}$ -DEPT NMR spectra of compound (3b).

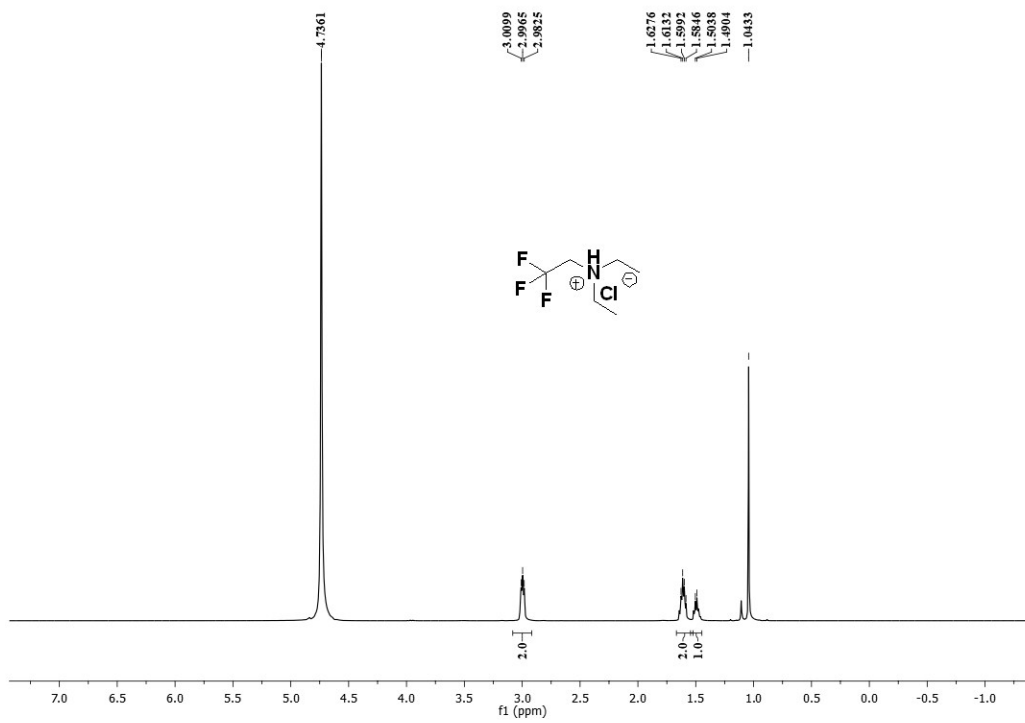

Figure FS21.  $^1\text{H}$  NMR spectra of compound (3d).

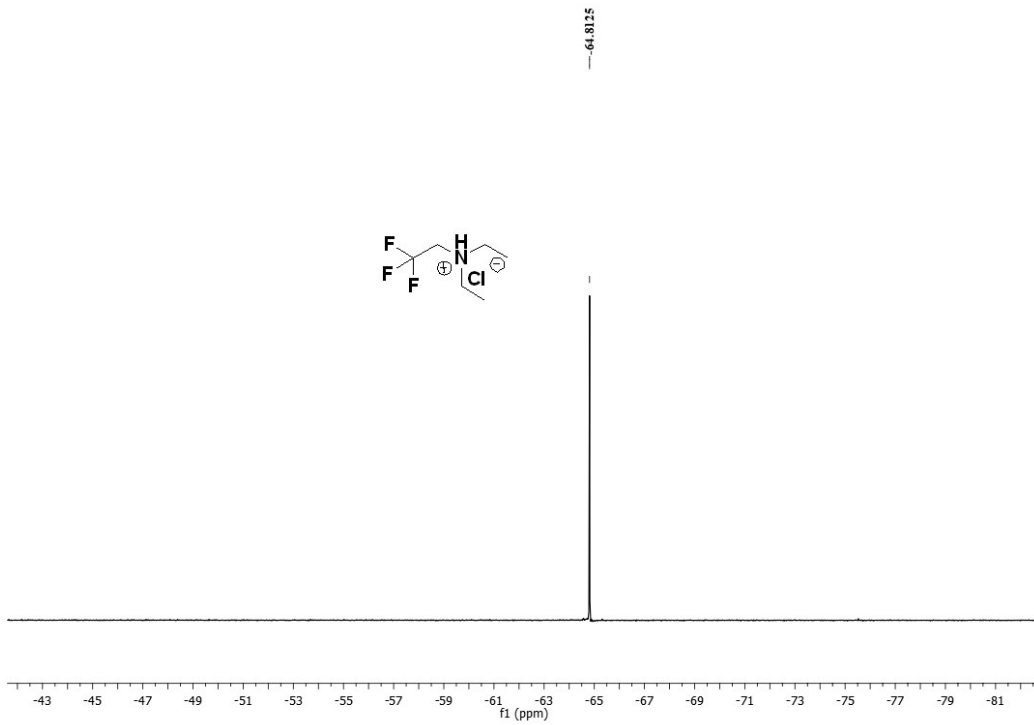

Figure FS22.  $^{19}\text{F}$  NMR spectra of compound (3d).

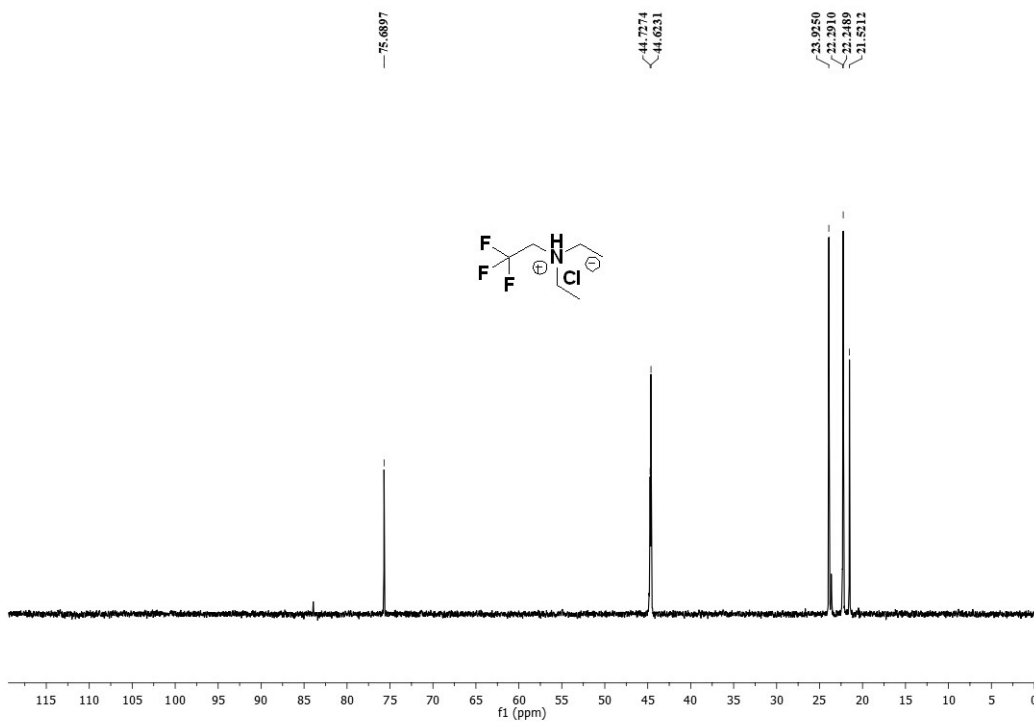

Figure FS23.  $^{13}\text{C}$  NMR spectra of compound (3d).

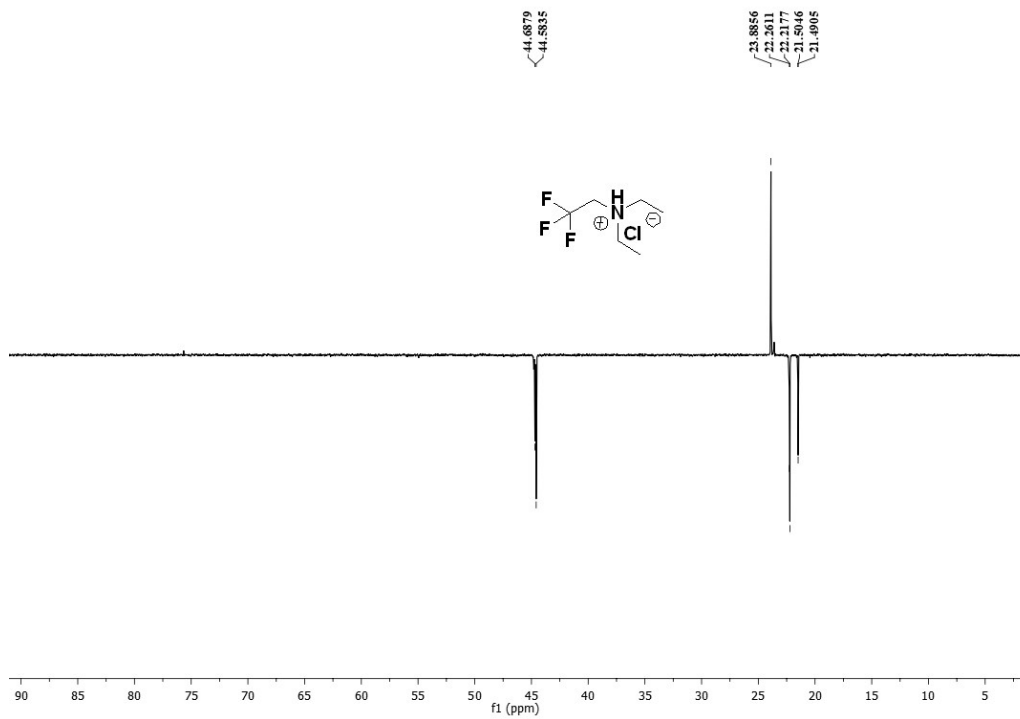

Figure FS24.  $^{13}\text{C}$ -DEPT NMR spectra of compound (3d).

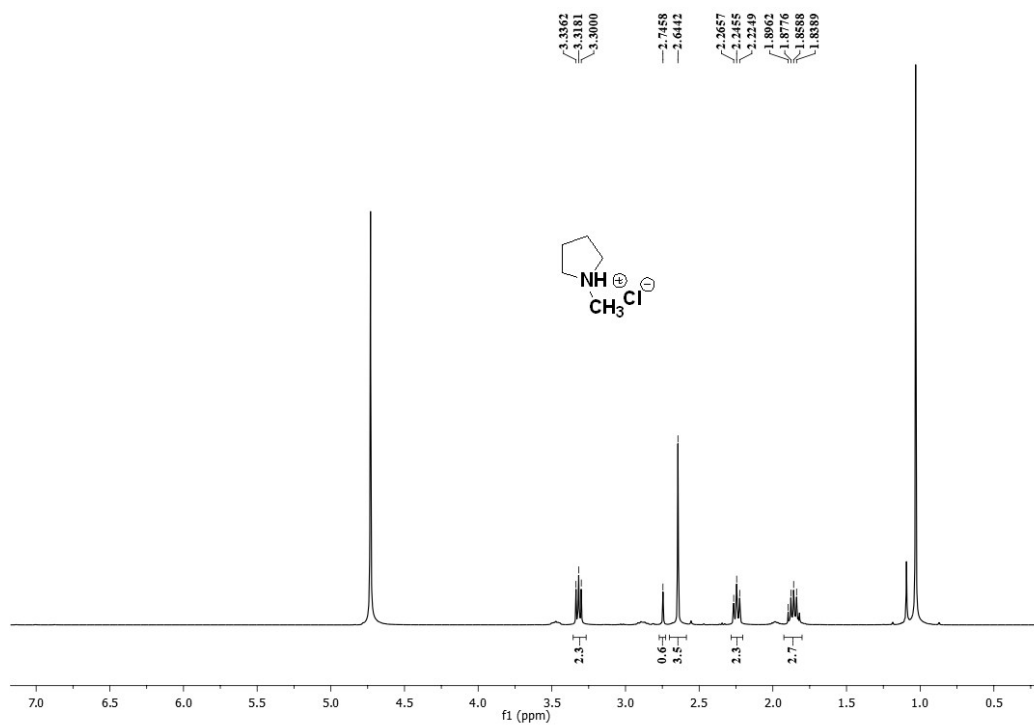

Figure FS25.  $^1\text{H}$  NMR spectra of compound (3e).

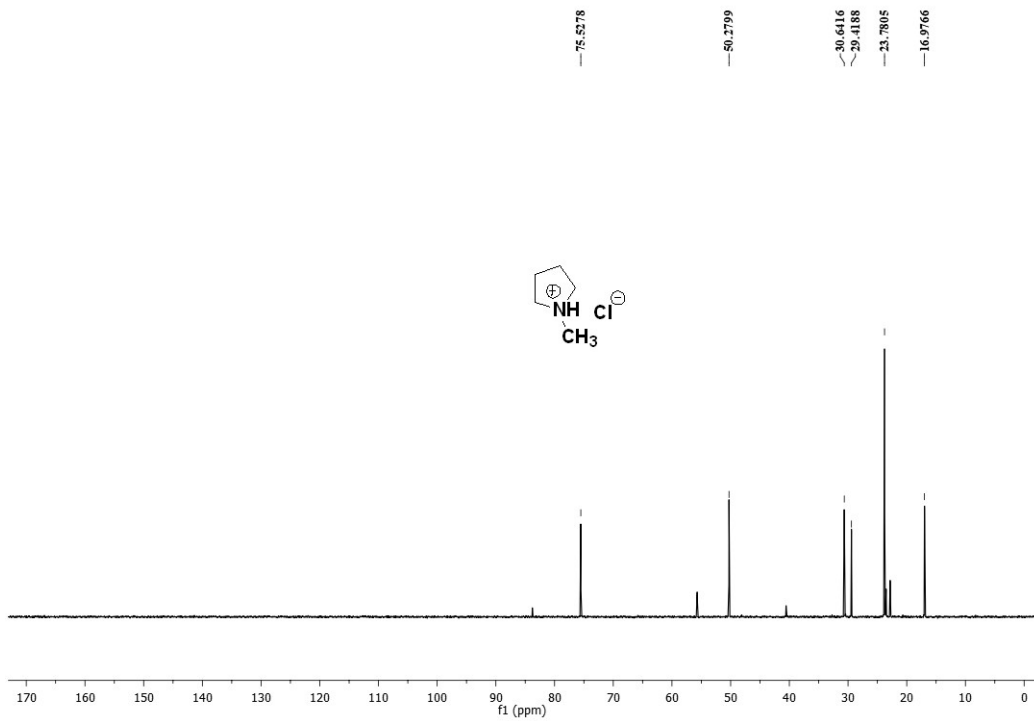

Figure FS26.  $^{13}\text{C}$  NMR spectra of compound (3e).

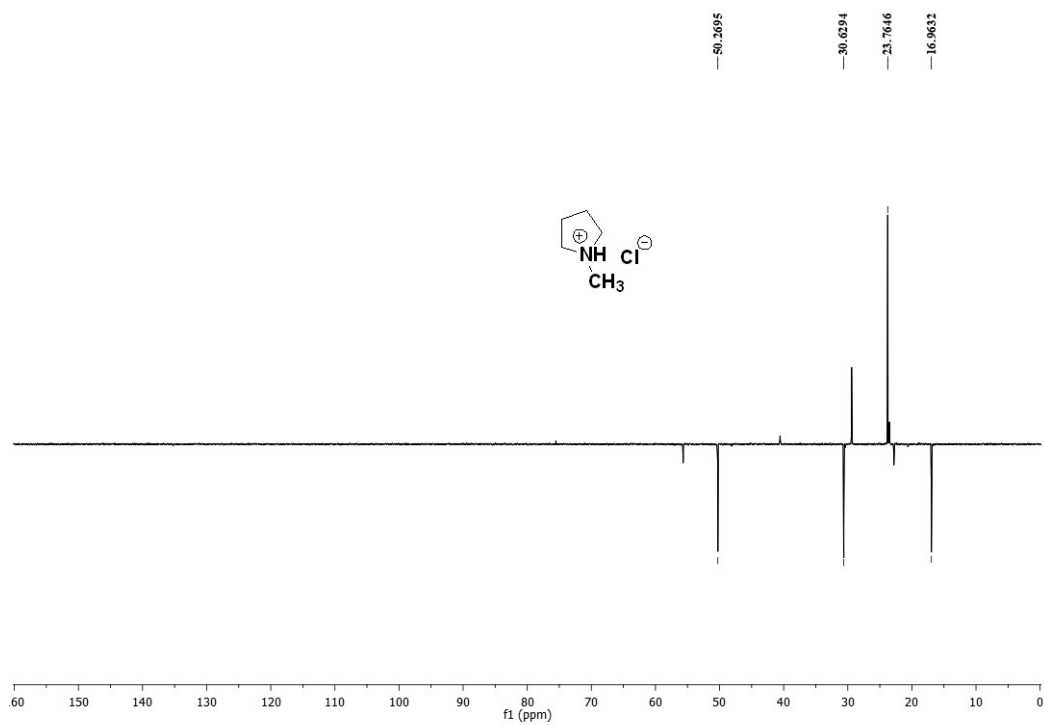

Figure FS27.  $^{13}\text{C}$ -DEPT NMR spectra of compound (3e).

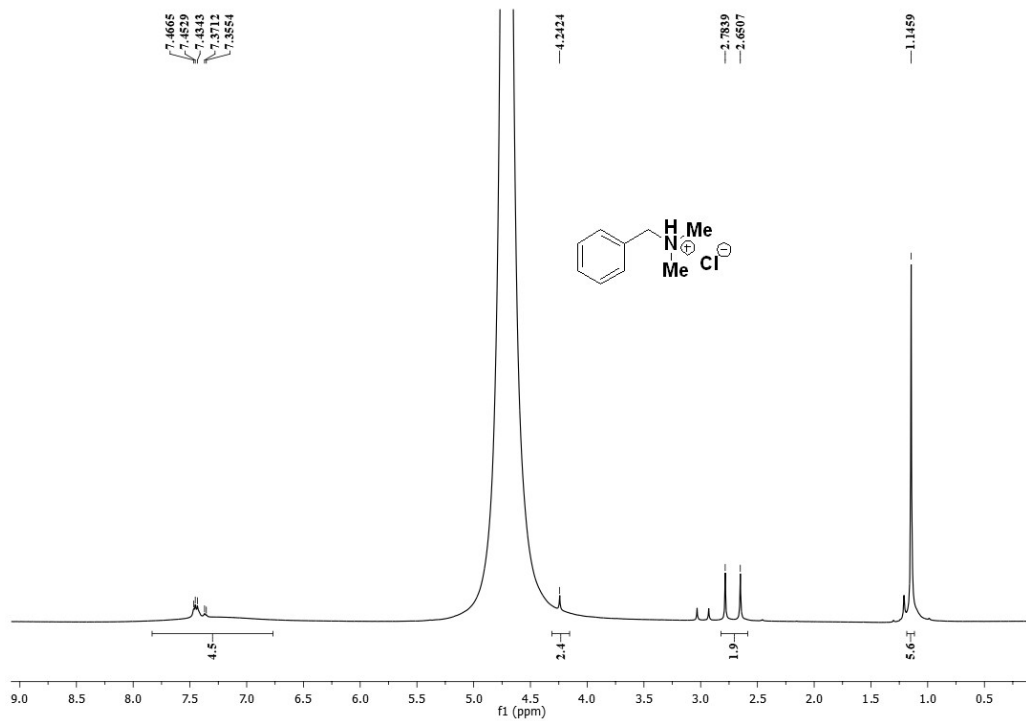

Figure FS28.  $^1\text{H}$  NMR spectra of compound (3f).

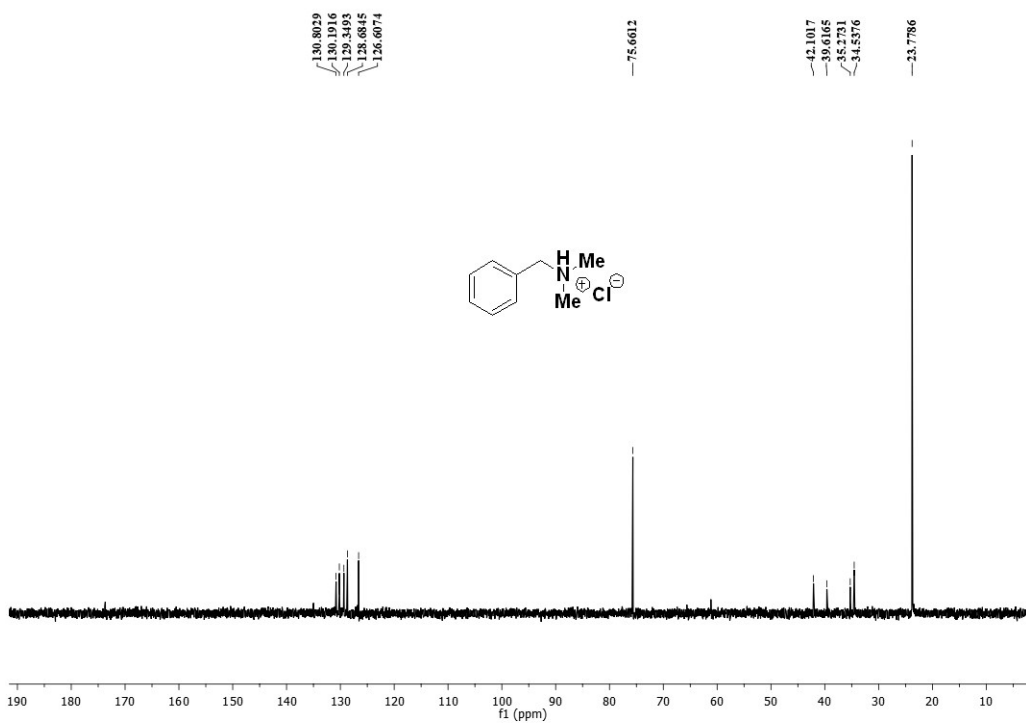

Figure FS29.  $^{13}\text{C}$  NMR spectra of compound (3e).

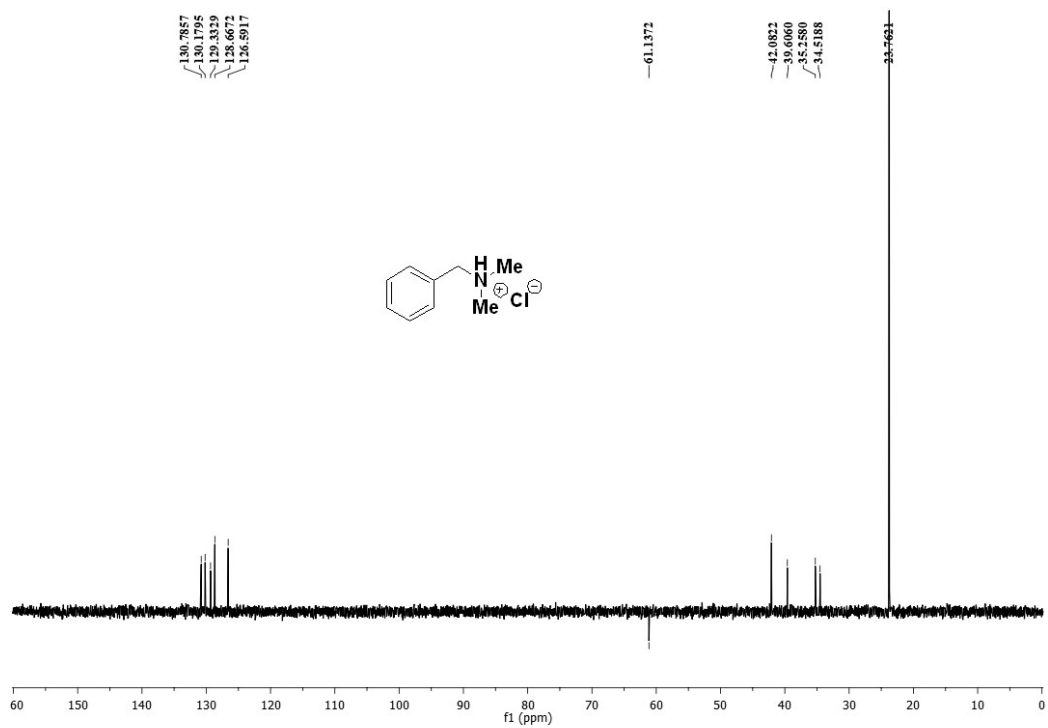

Figure FS30. <sup>13</sup>C-DEPT NMR spectra of compound (3e).

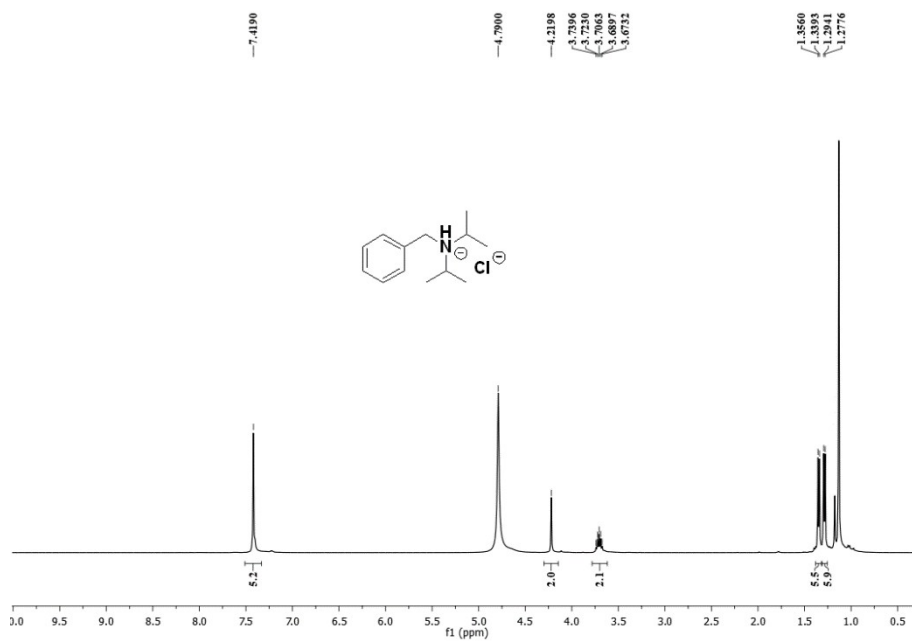

Figure FS31. <sup>1</sup>H NMR spectra of compound (3g).

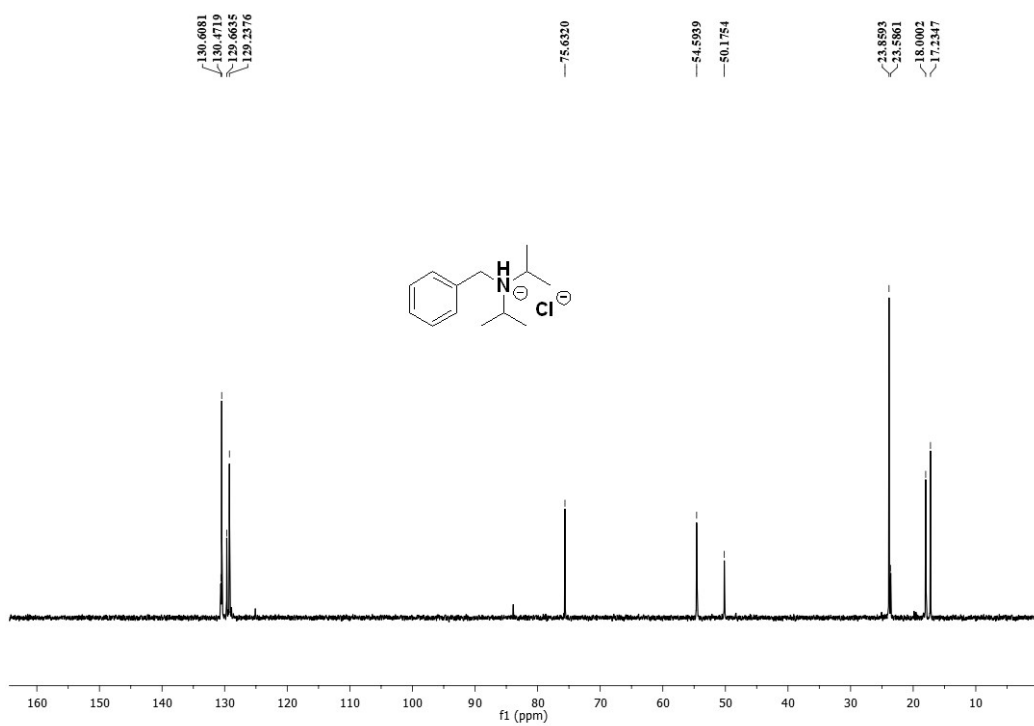

Figure FS32. <sup>13</sup>C NMR spectra of compound (3g).

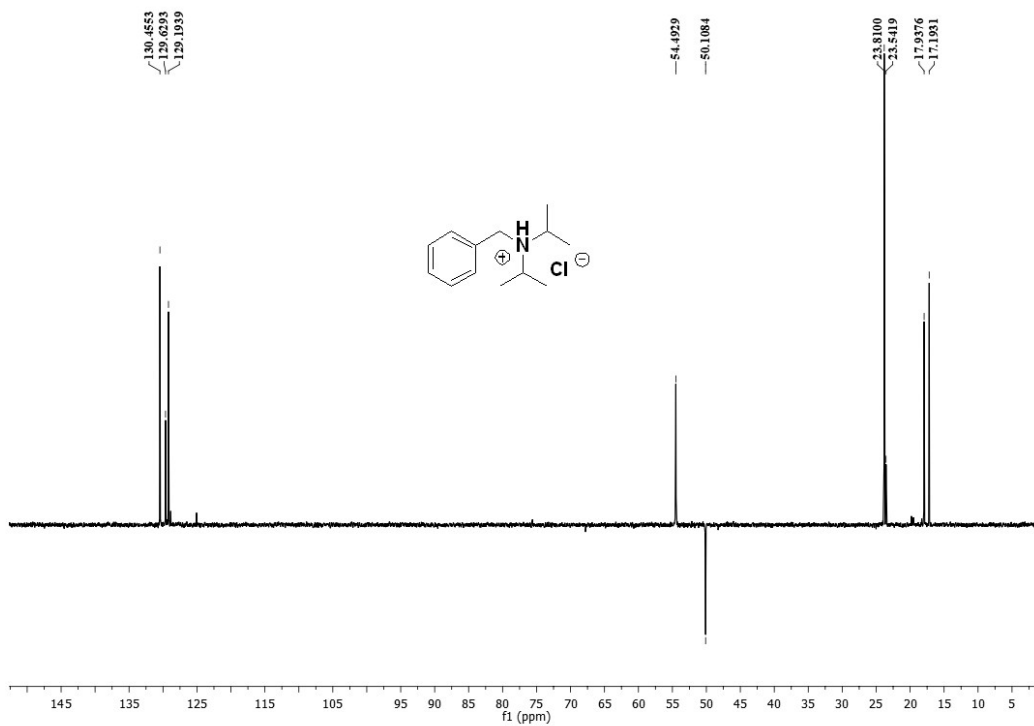

Figure FS33. <sup>13</sup>C-DEPT NMR spectra of compound (3g).

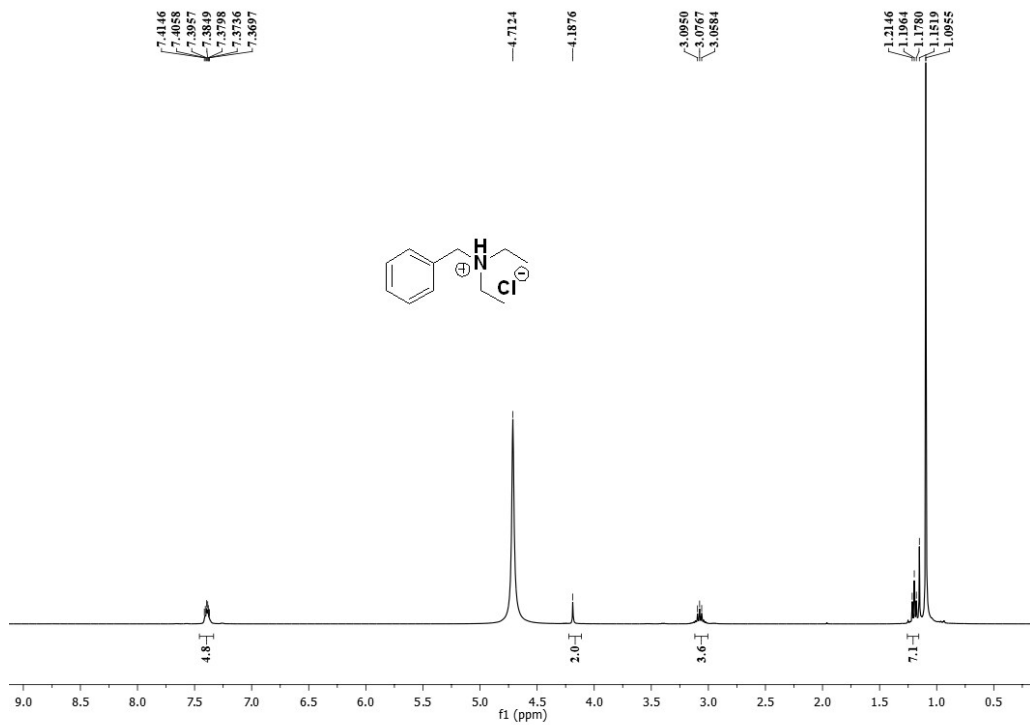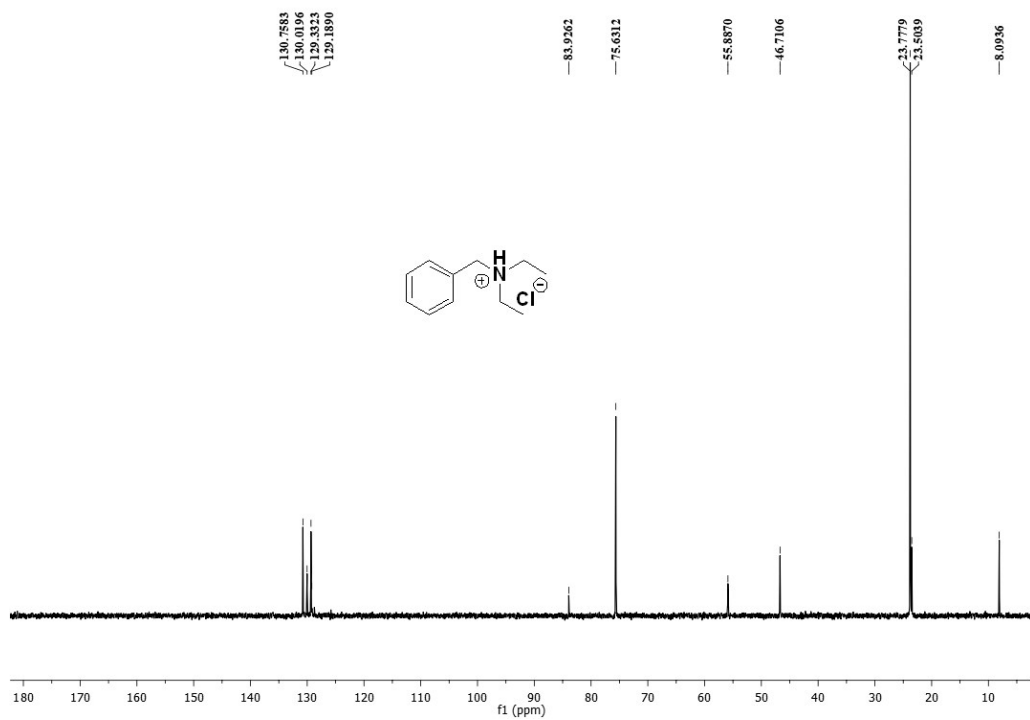

**Figure FS35. <sup>13</sup>C NMR spectra of compound (3h).**





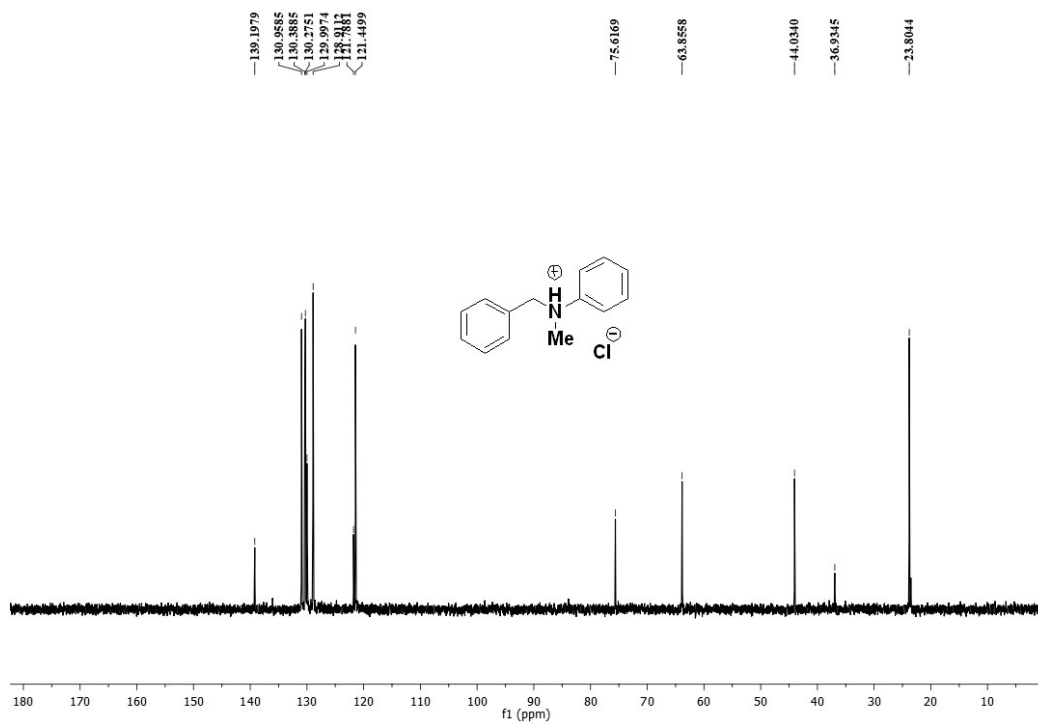

Figure FS38.  $^{13}\text{C}$  NMR spectra of compound (3i).

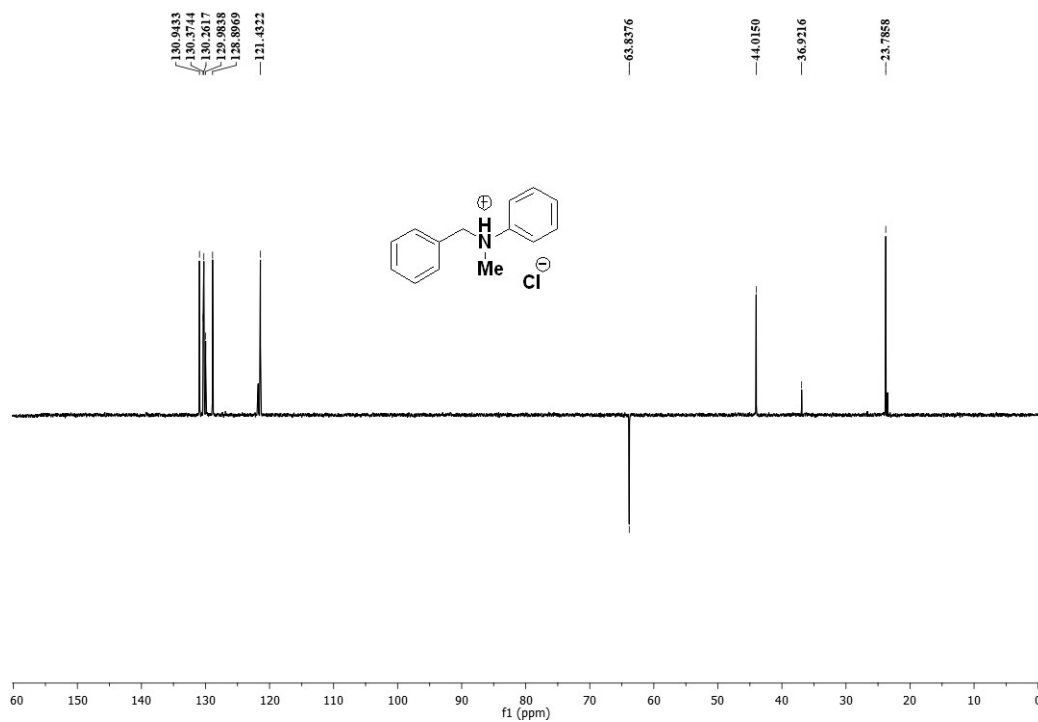

Figure FS39.  $^{13}\text{C}$ -DEPT NMR spectra of compound (3i).

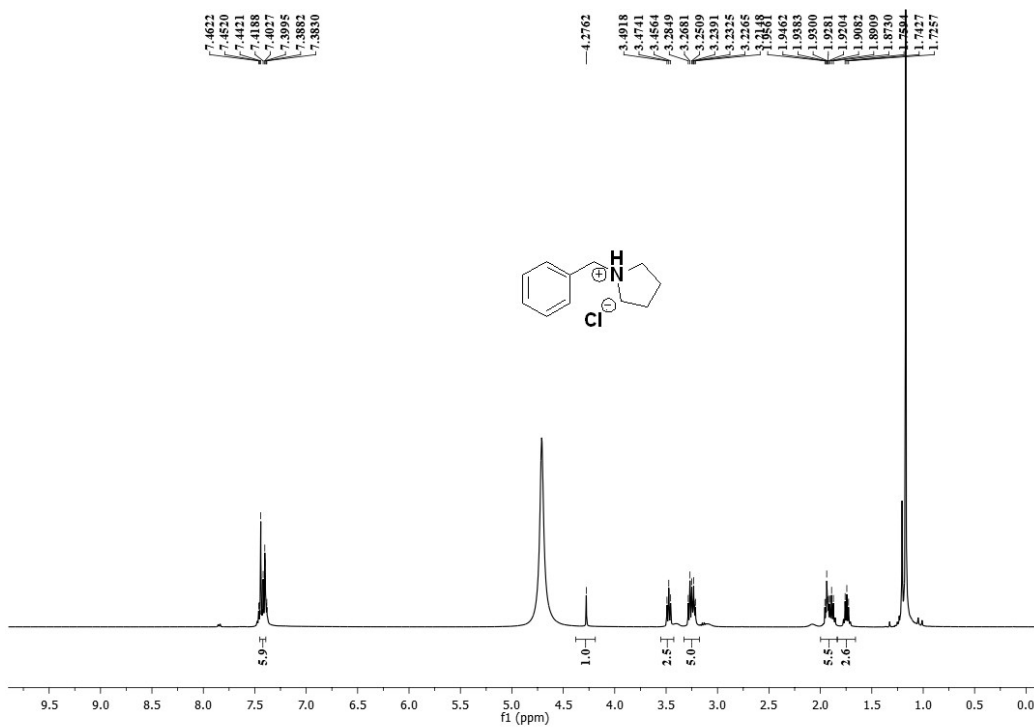

Figure FS40.  $^1\text{H}$  NMR spectra of compound (3i).

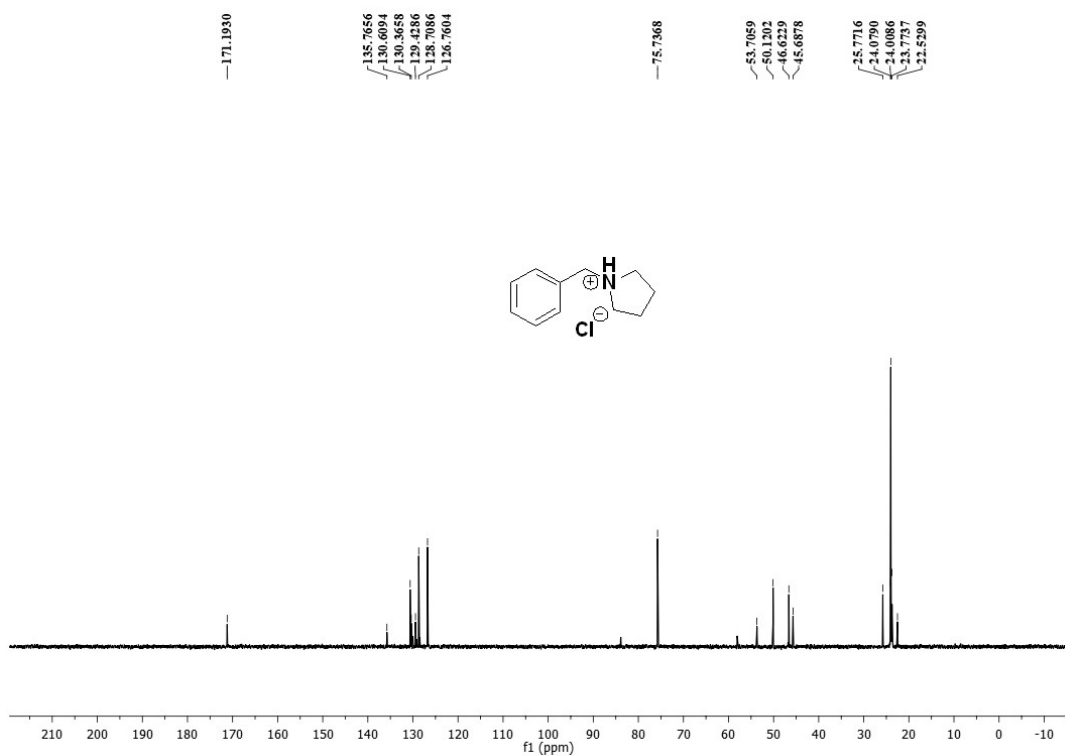

Figure FS41.  $^{13}\text{C}$  NMR spectra of compound (3i).

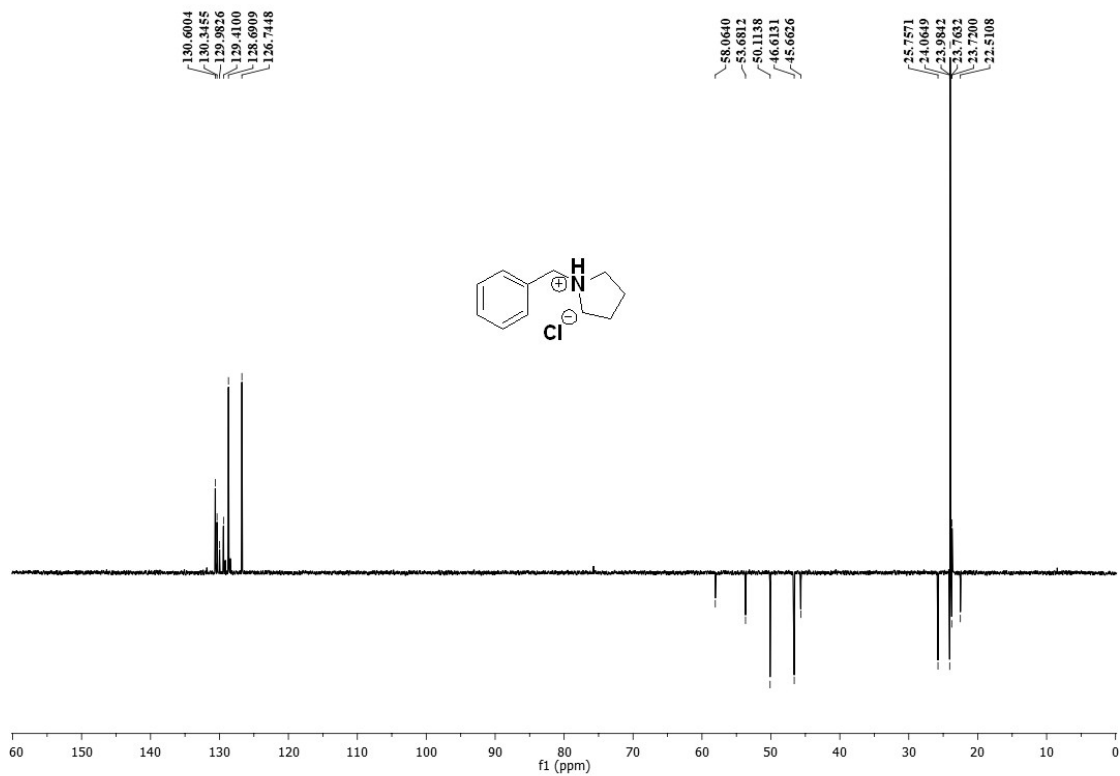

Figure FS42. <sup>13</sup>C- DEPT NMR spectra of compound (3i).

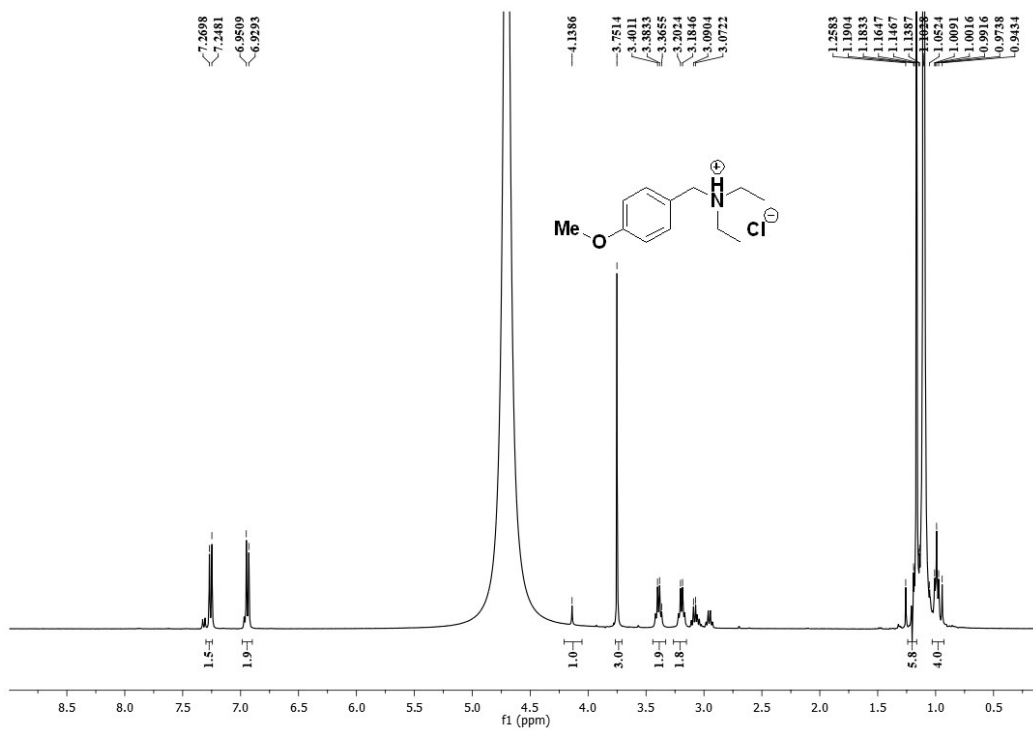

Figure FS43. <sup>1</sup>H NMR spectra of compound (3k).

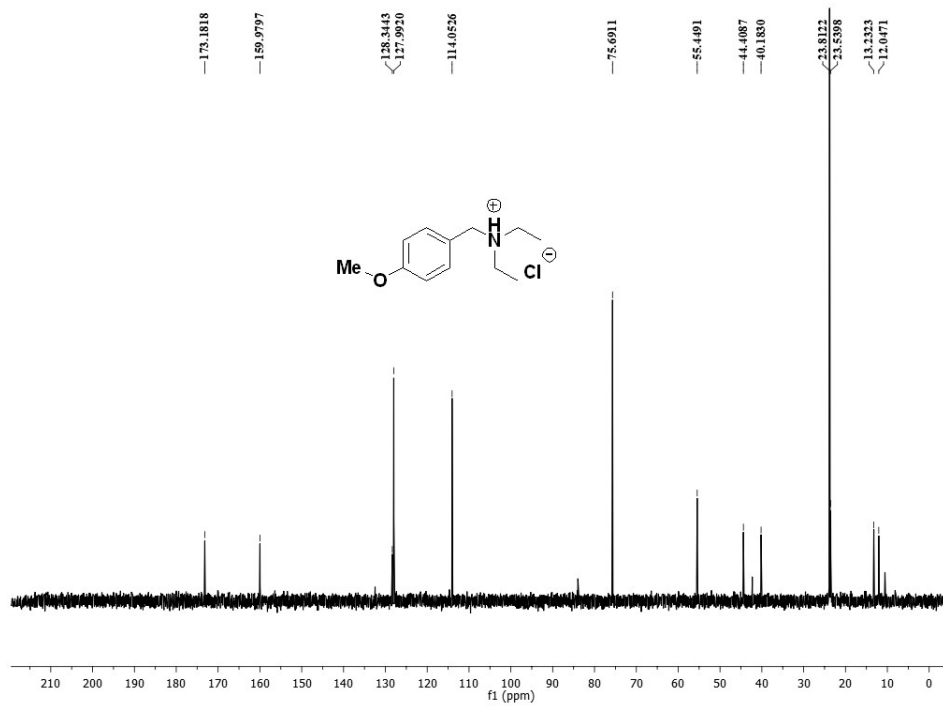

**Figure FS44.**  $^{13}\text{C}$  NMR spectra of compound (3k).

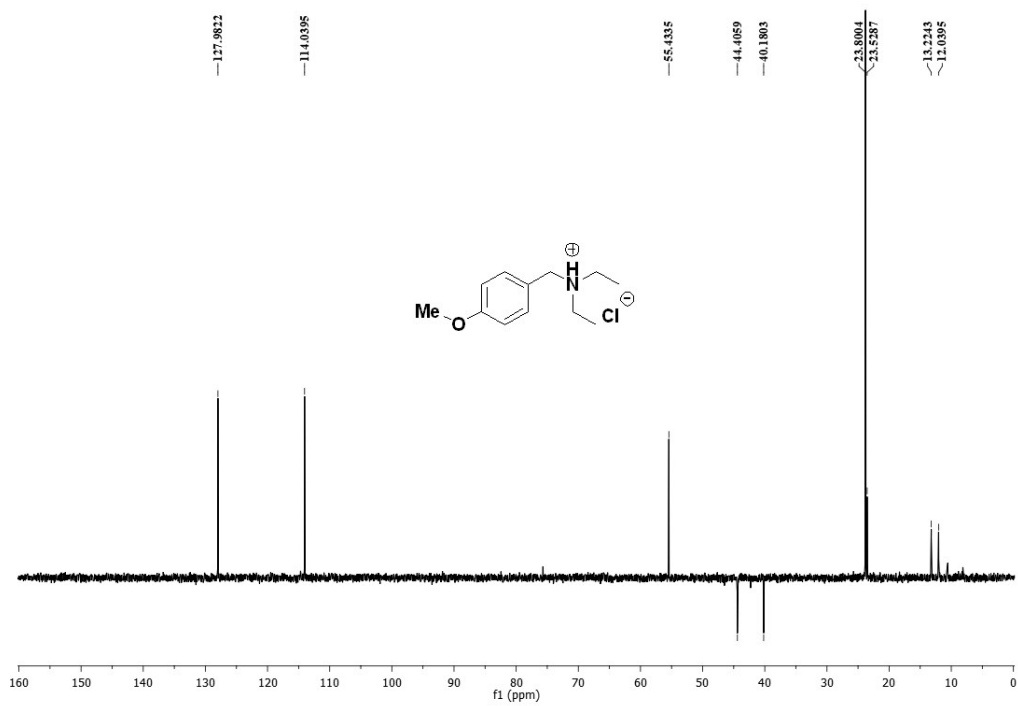

**Figure FS45.**  $^{13}\text{C}$ -DEPT NMR spectra of compound (3k).

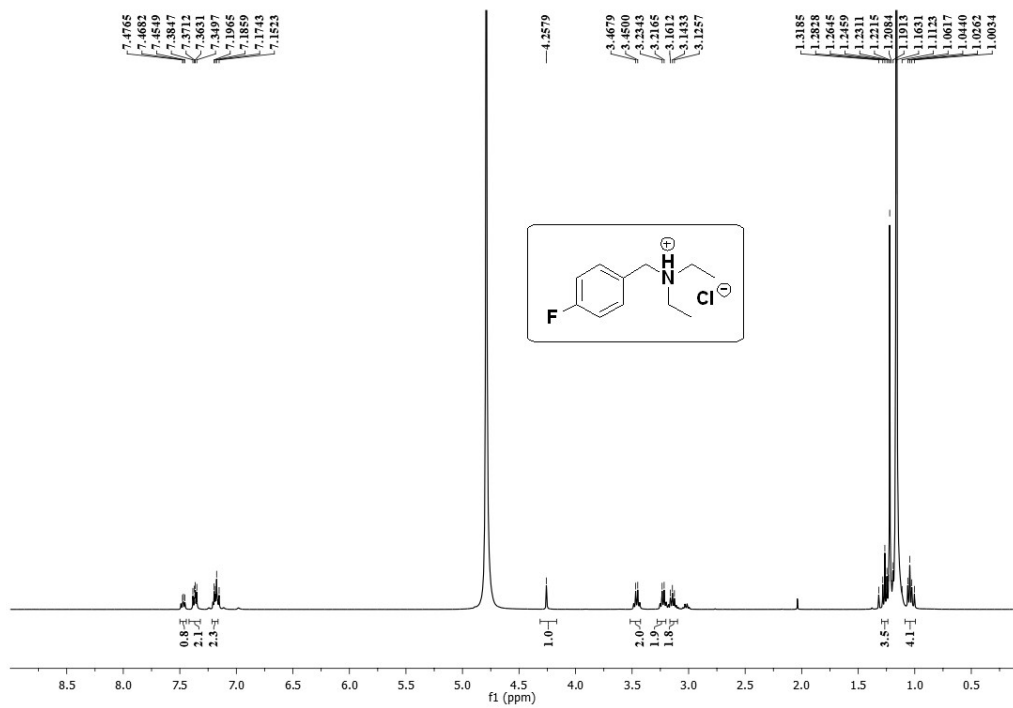

Figure FS46. <sup>1</sup>H NMR spectra of compound (3).

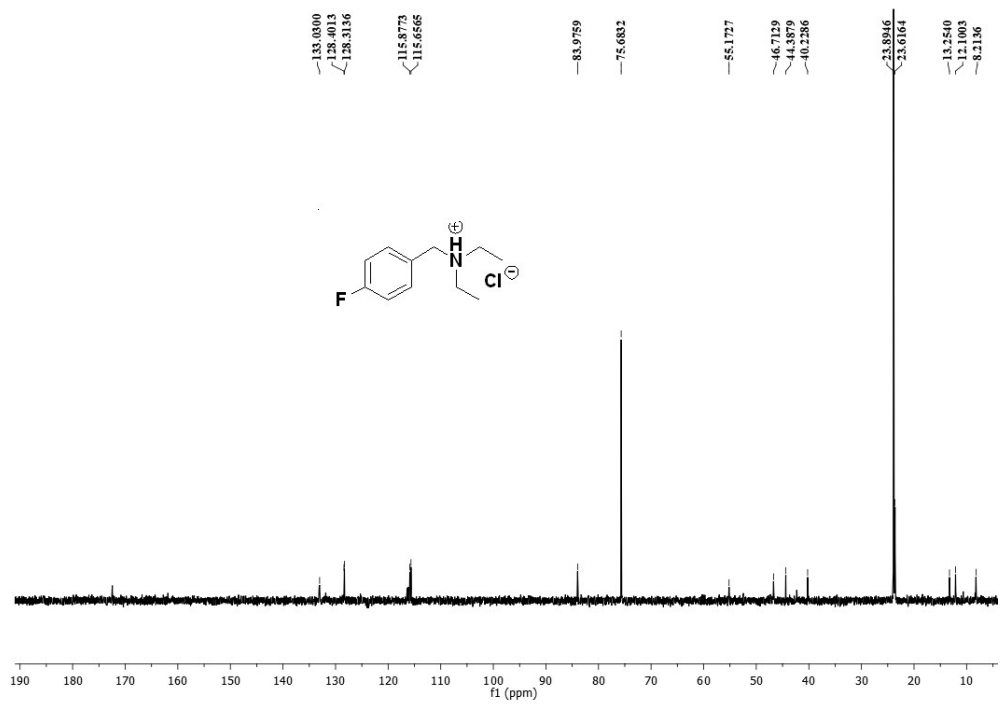

Figure FS47. <sup>13</sup>C NMR spectra of compound (3).

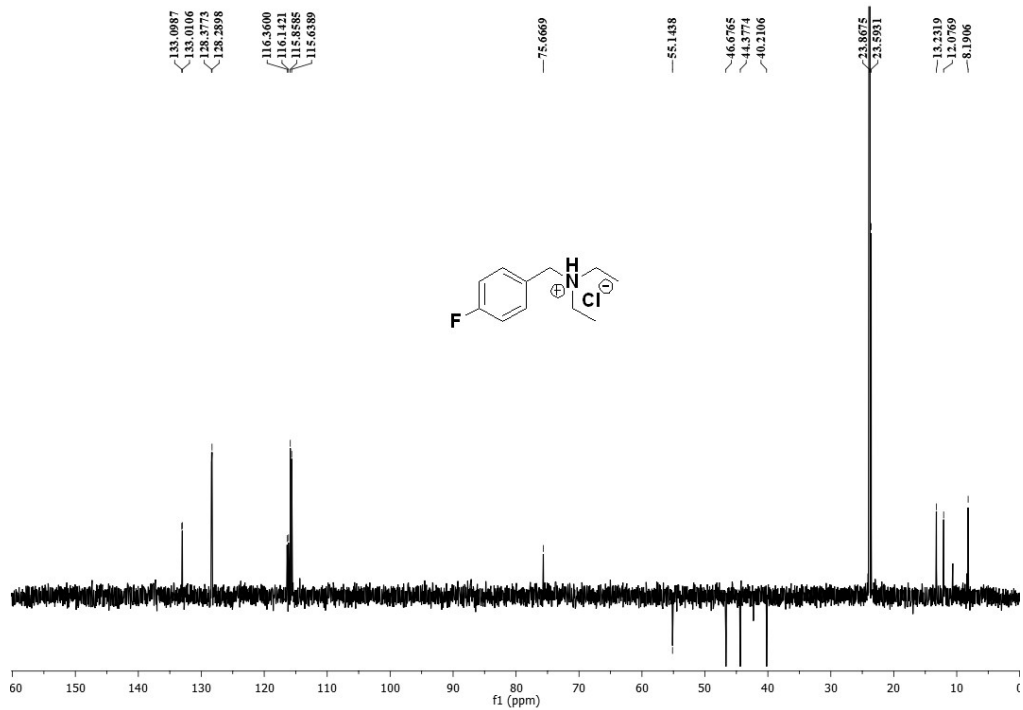

Figure FS48.  $^{13}\text{C}$ -DEPT NMR spectra of compound (3l).

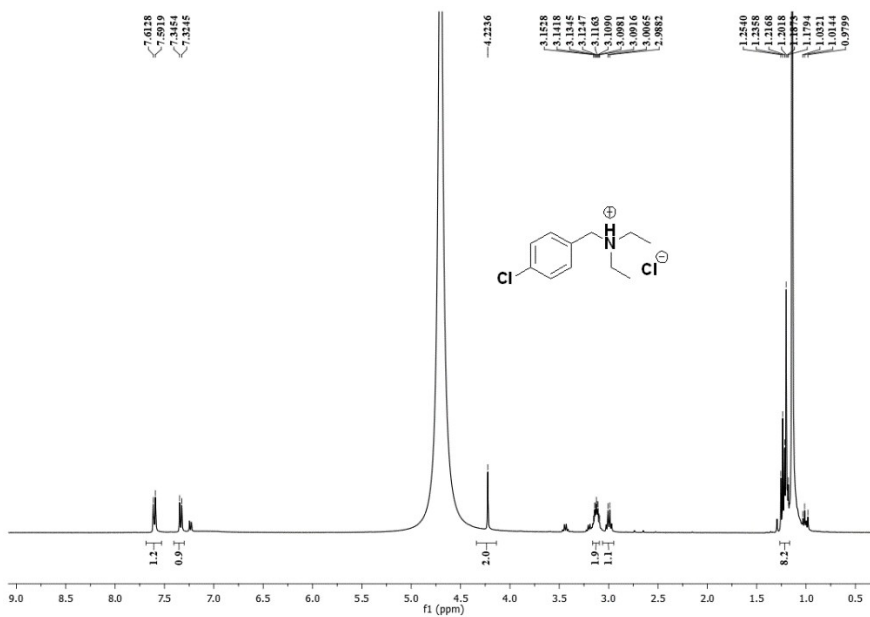

Figure FS49.  $^1\text{H}$  NMR spectra of compound (3m).

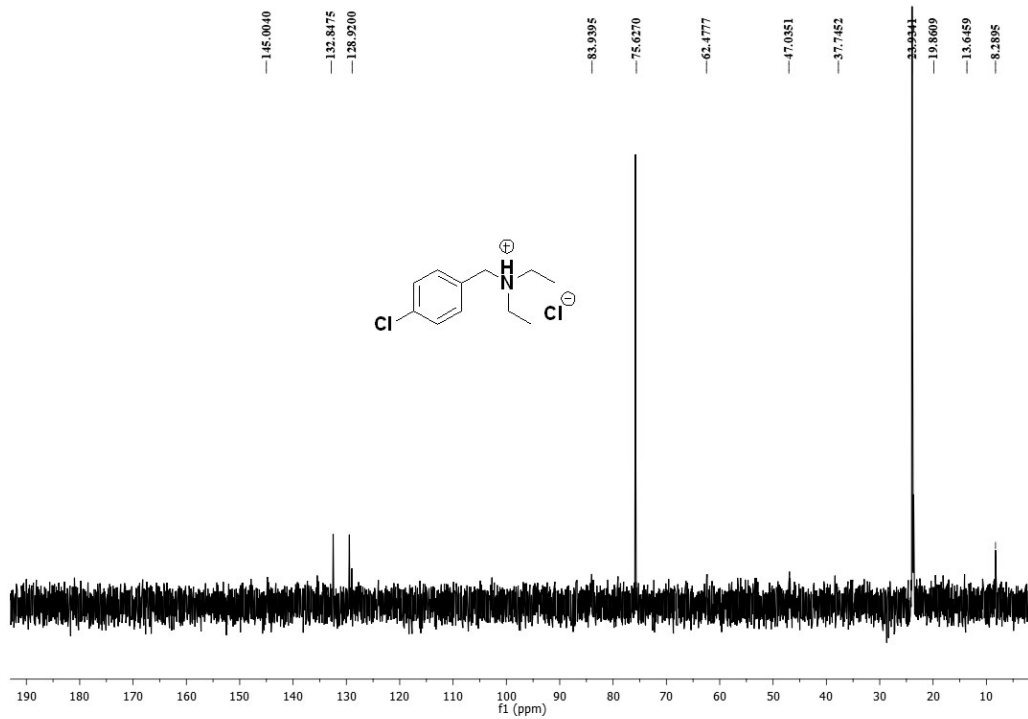

Figure FS50. <sup>13</sup>C NMR spectra of compound (3m).

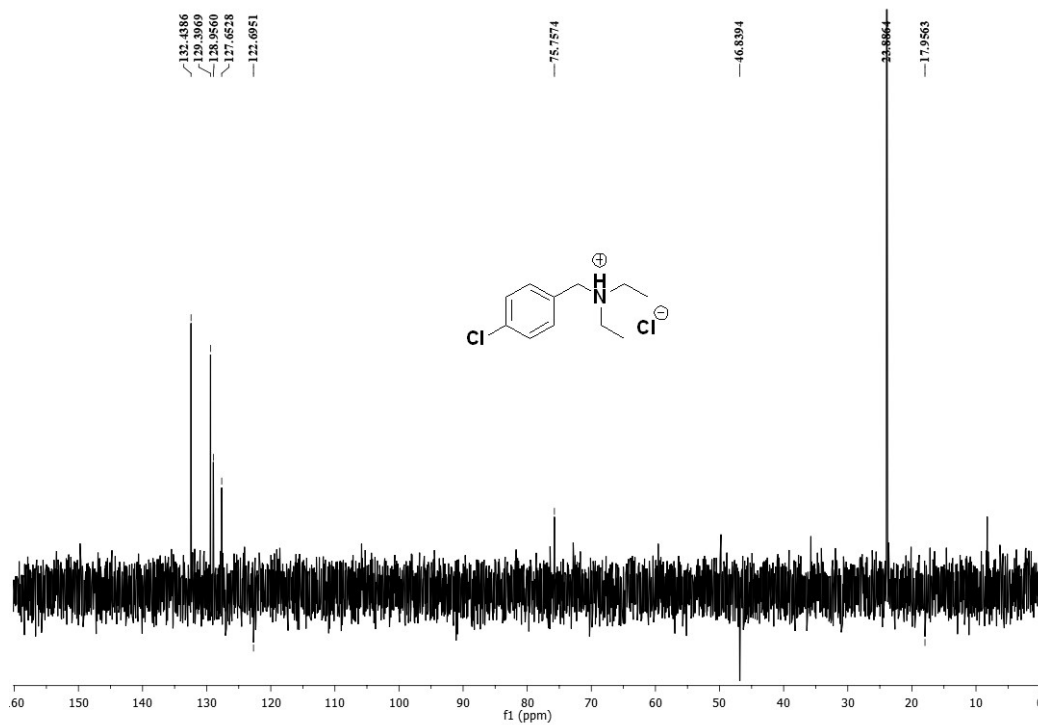

Figure FS51. <sup>13</sup>C -DEPT NMR spectra of compound (3m).



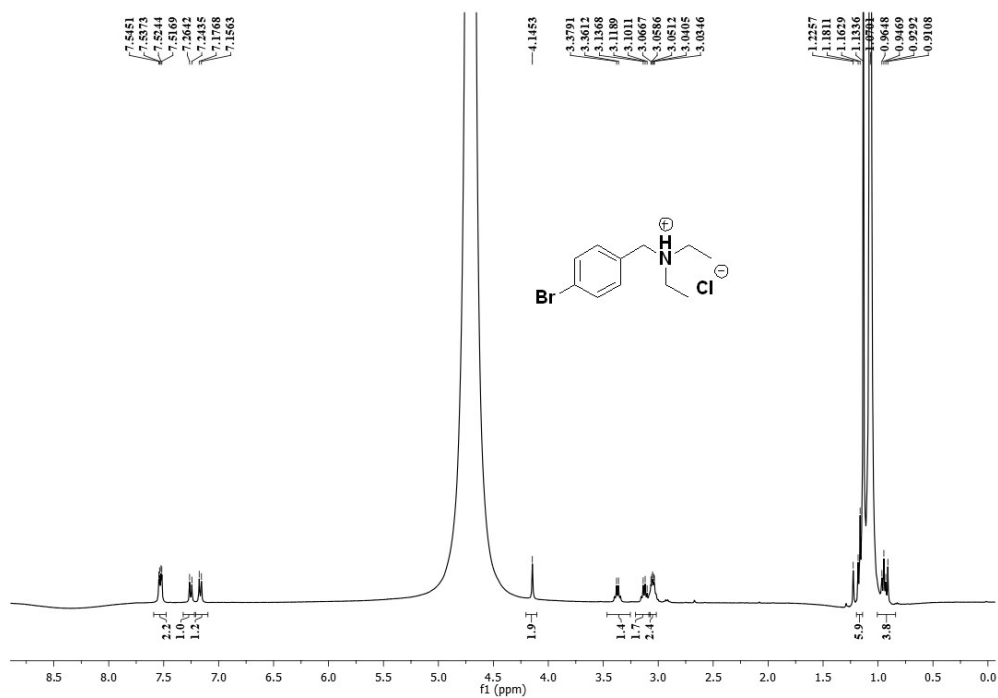

Figure FS52. <sup>1</sup>H NMR spectra of compound (3n).

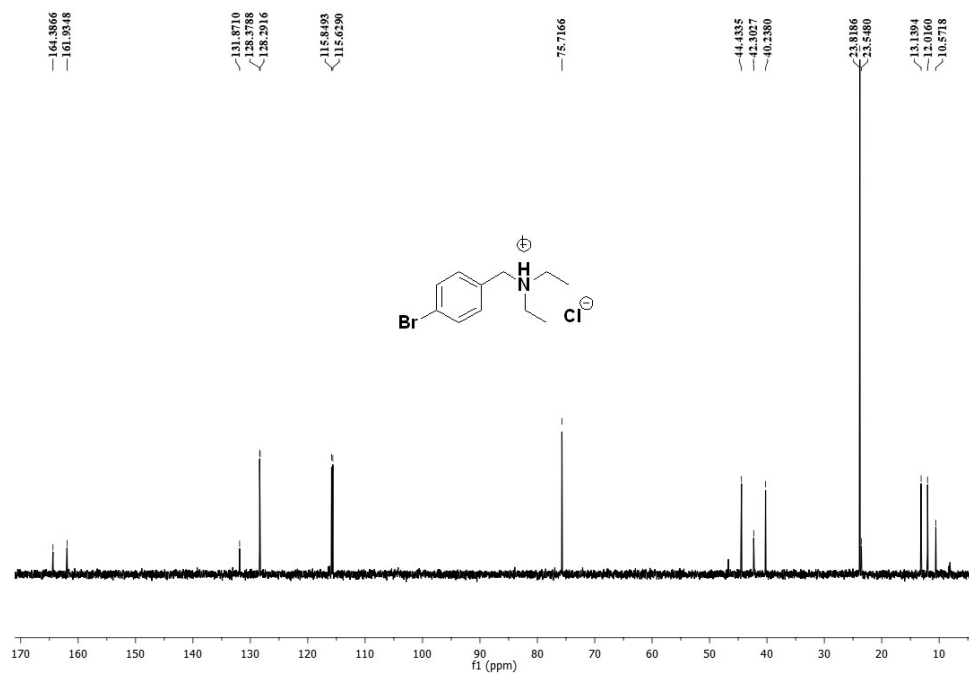

Figure FS53. <sup>13</sup>C NMR spectra of compound (3n).

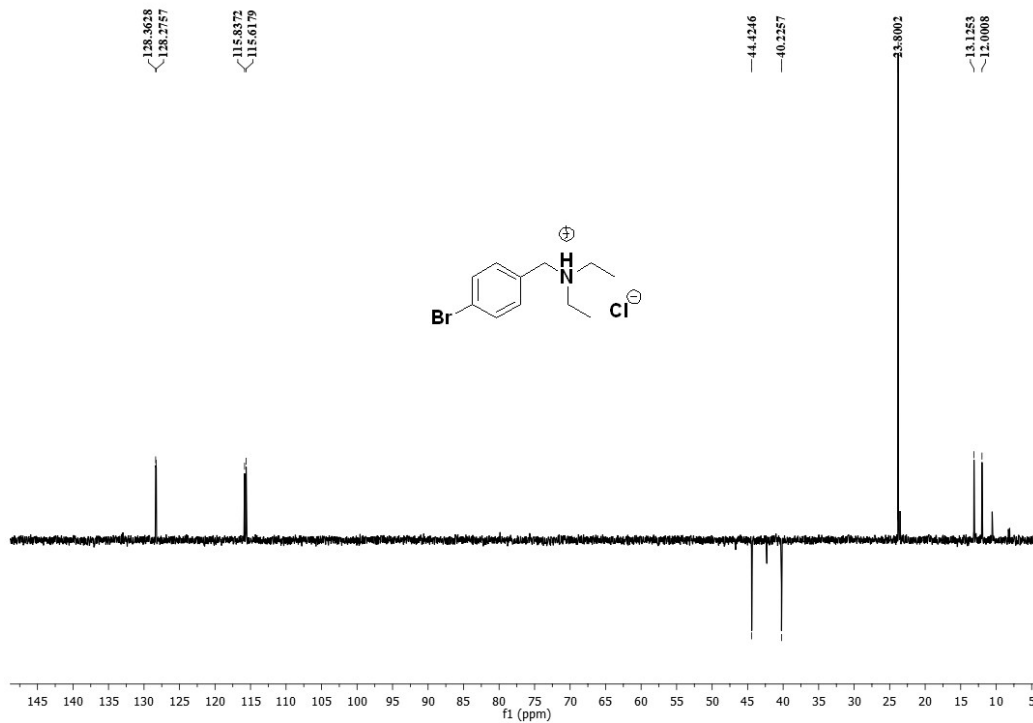

Figure FS54.  $^{13}\text{C}$ -DEPT NMR spectra of compound (3n).

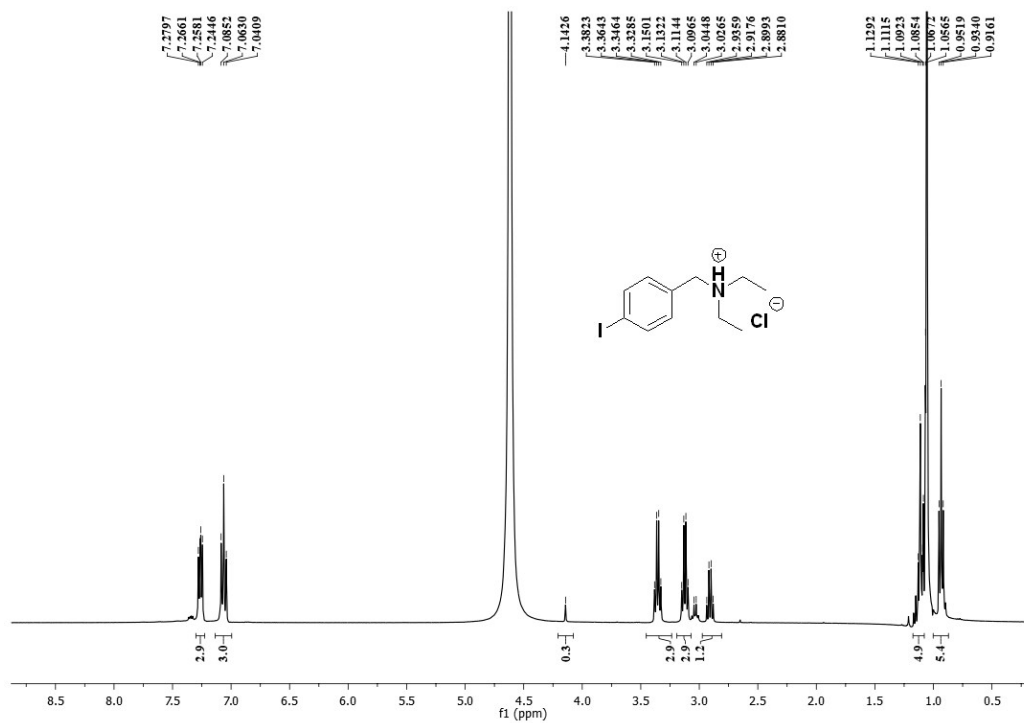

Figure FS55.  $^1\text{H}$  NMR spectra of compound (3o).

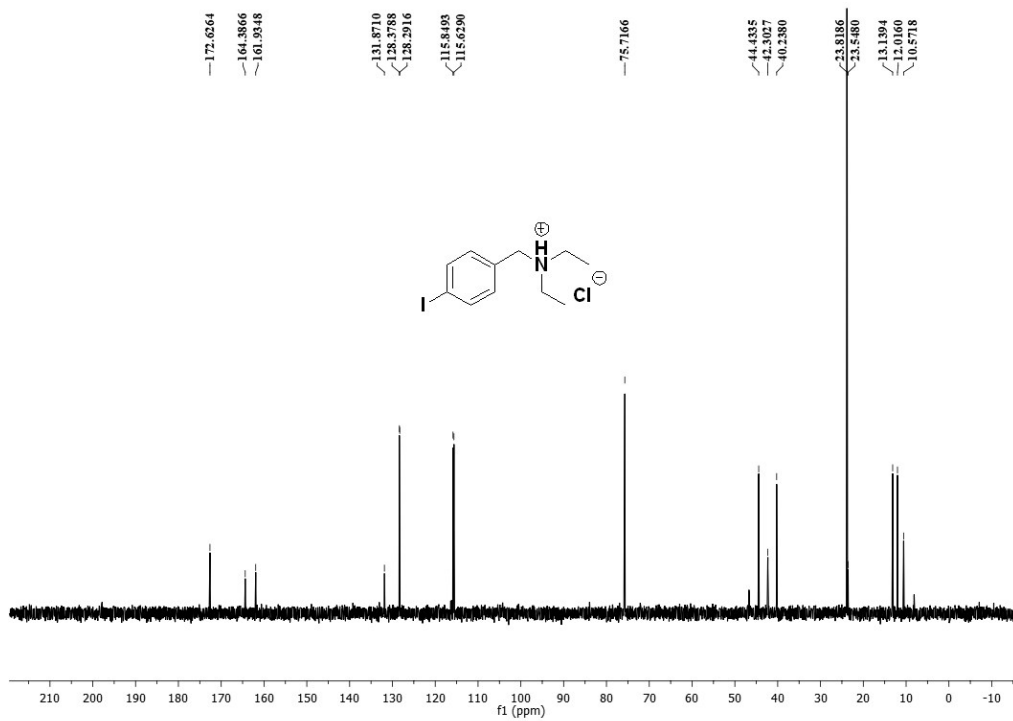

**Figure FS56.**  $^{13}\text{C}$  NMR spectra of compound (30).

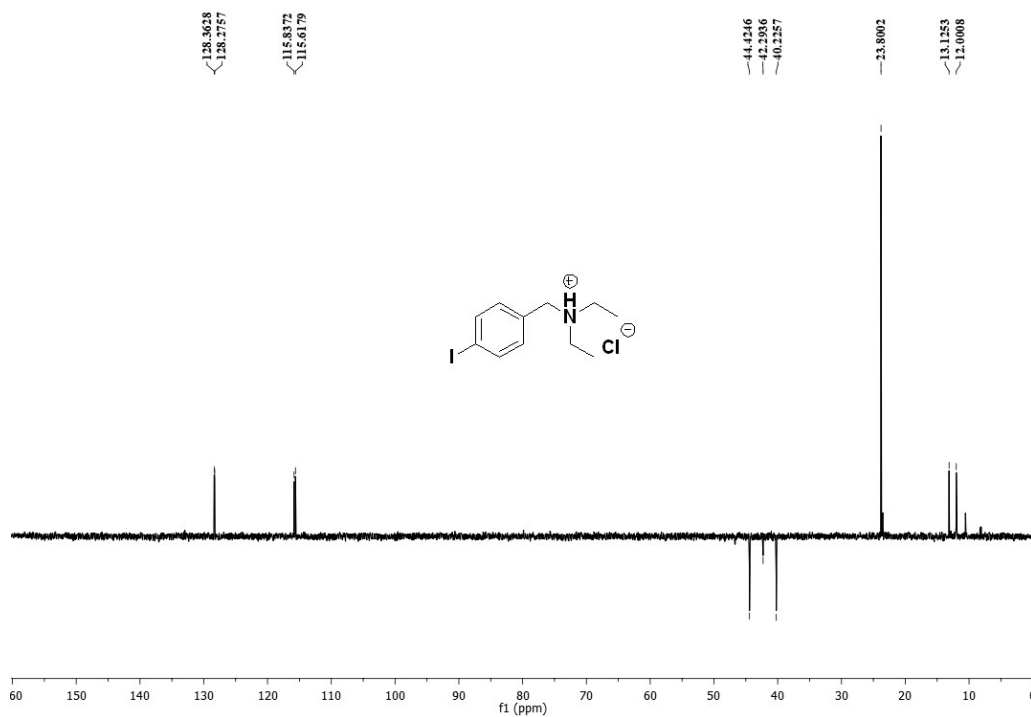

**Figure FS57.**  $^{13}\text{C}$ -DEPT NMR spectra of compound (30).

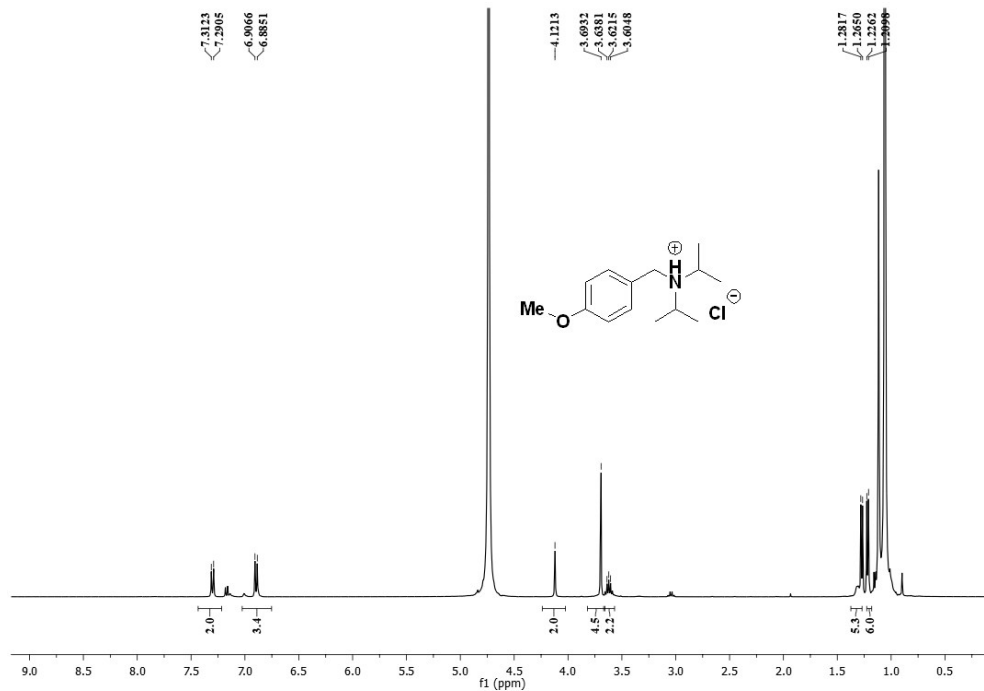

**Figure FS58. <sup>1</sup>H NMR spectra of compound (3p).**

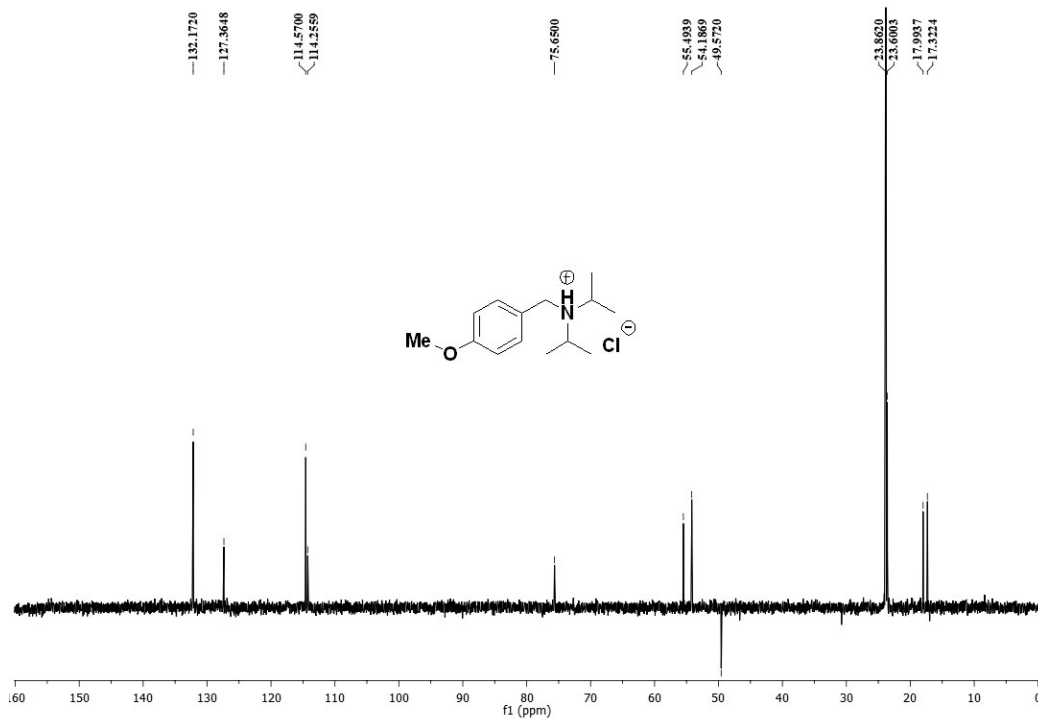

**Figure FS59. <sup>13</sup>C NMR spectra of compound (3p).**

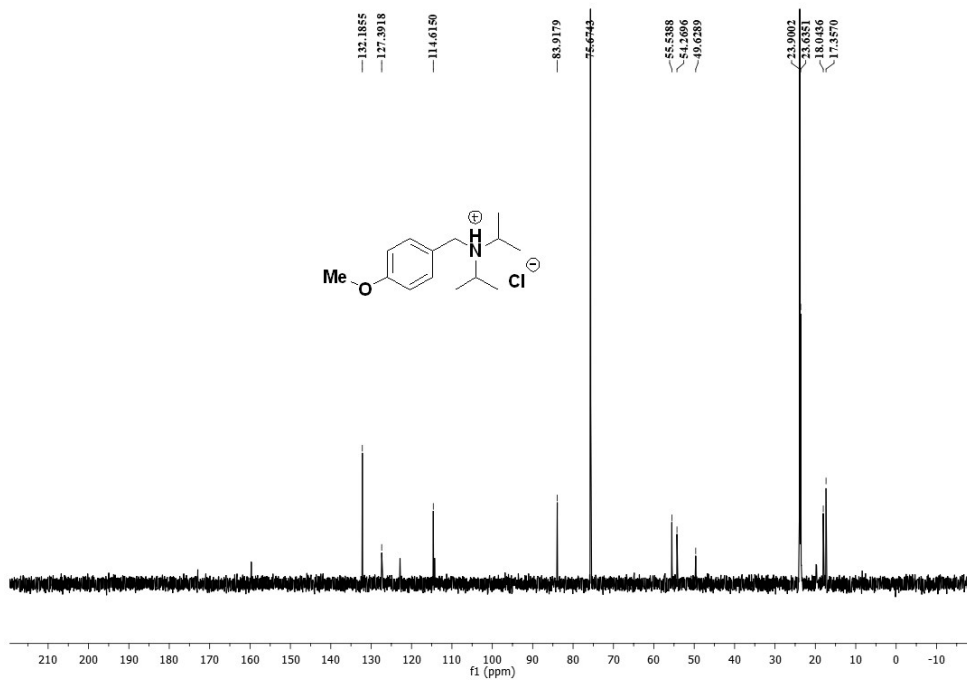

Figure FS60. <sup>13</sup>C-DEPT NMR spectra of compound (3p).

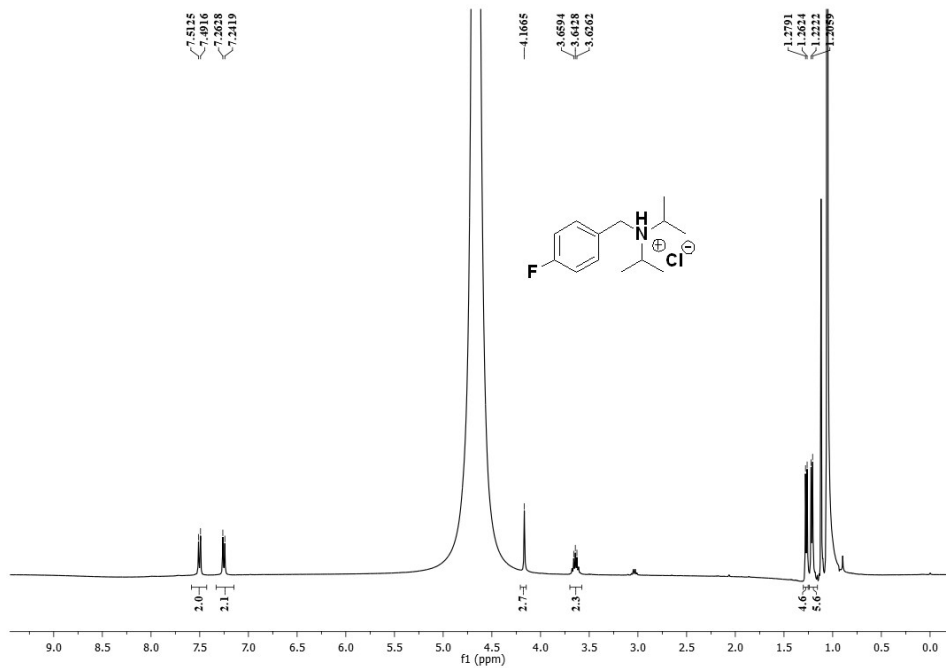

Figure FS61. <sup>1</sup>H NMR spectra of compound (3q).

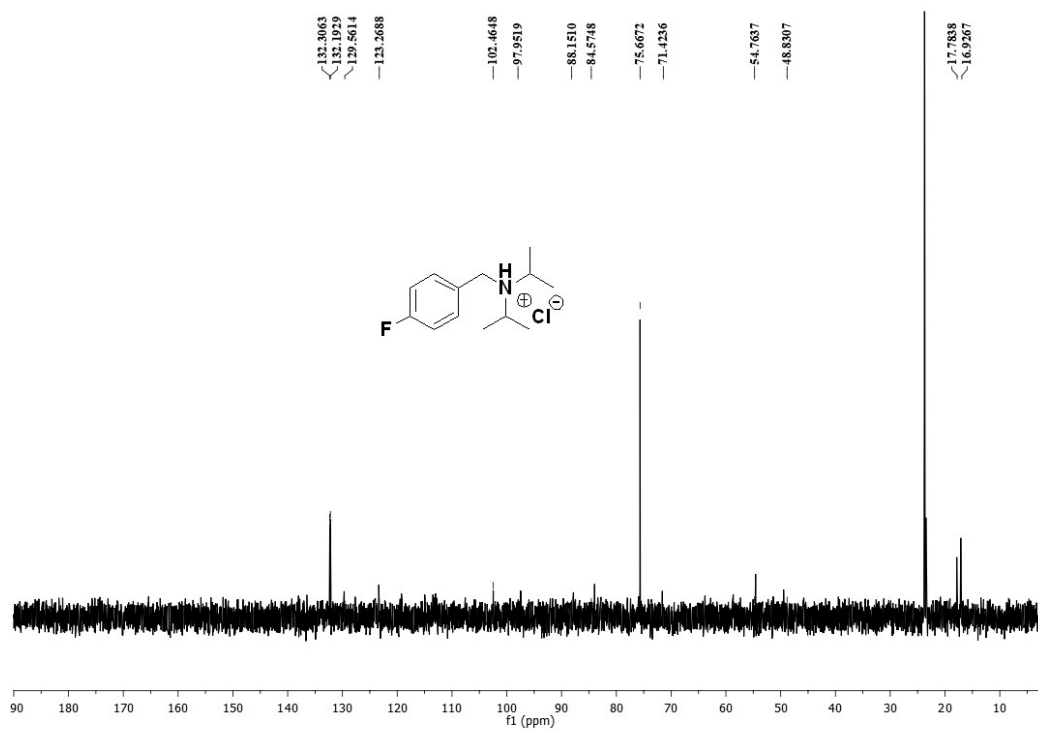

Figure FS62.  $^{13}\text{C}$  NMR spectra of compound (3q).

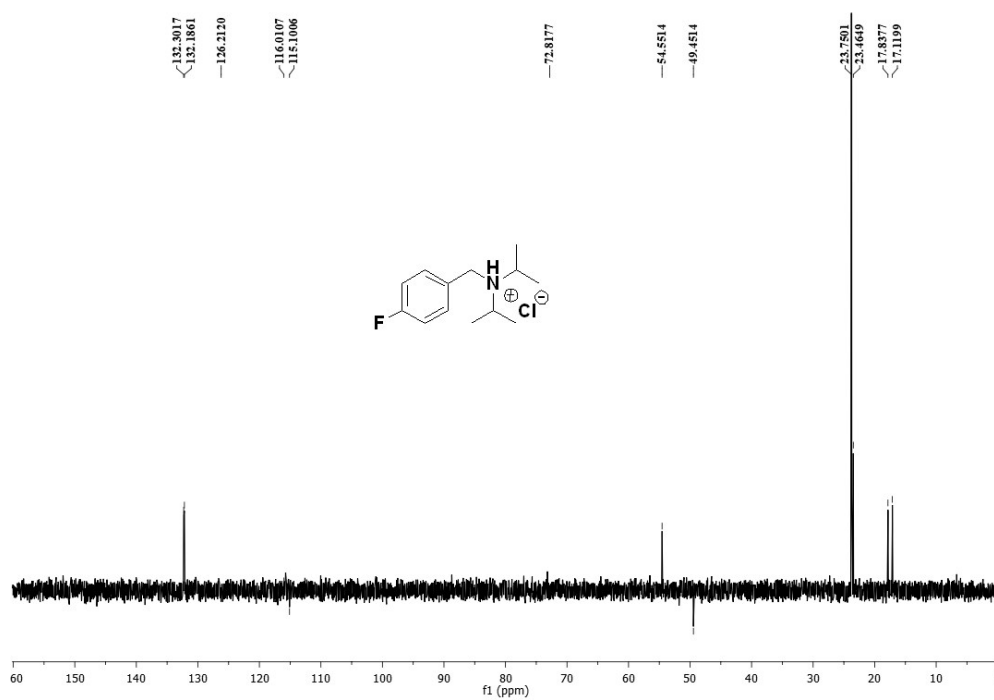

Figure FS63.  $^{13}\text{C}$ -DEPT NMR spectra of compound (3q).

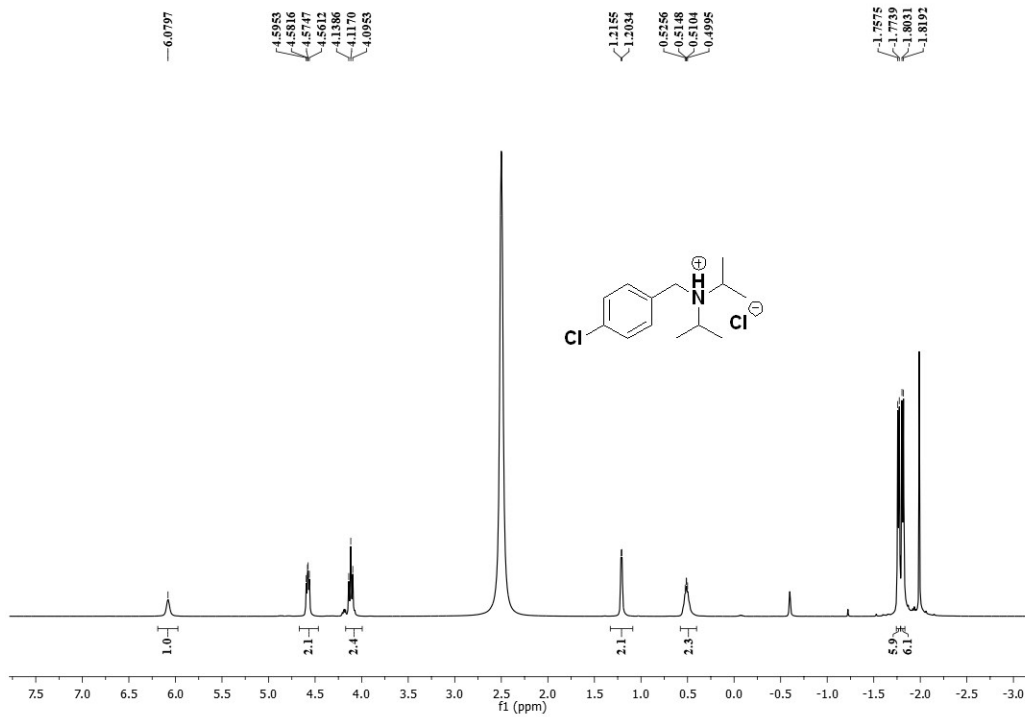

Figure FS64. <sup>1</sup>H NMR spectra of compound (3r).

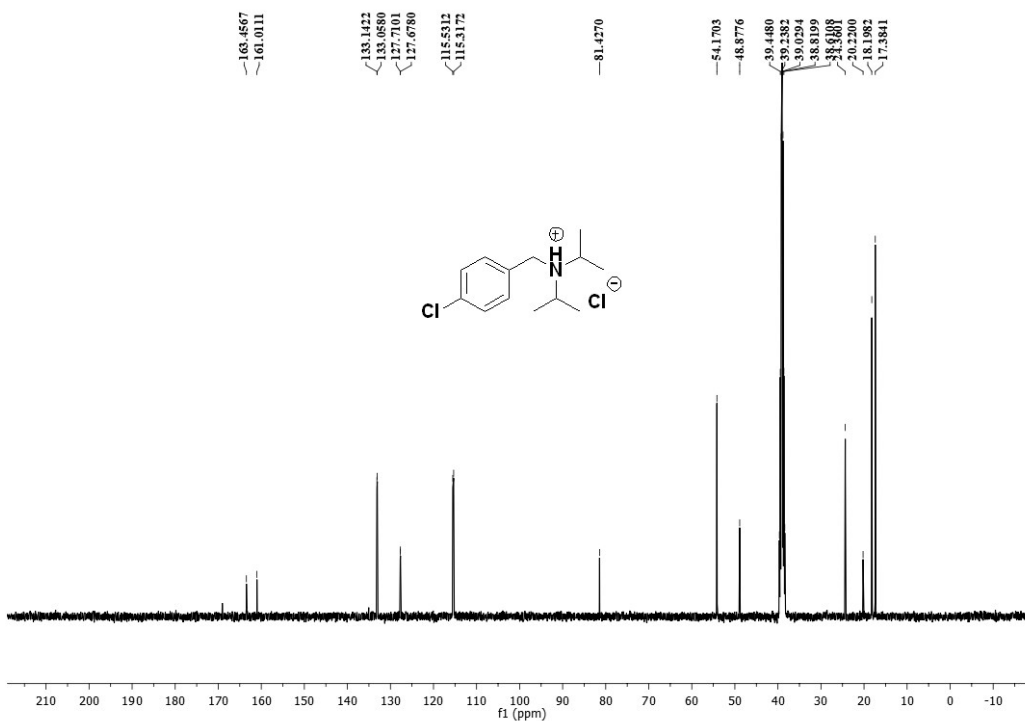

Figure FS65. <sup>13</sup>C NMR spectra of compound (3r).

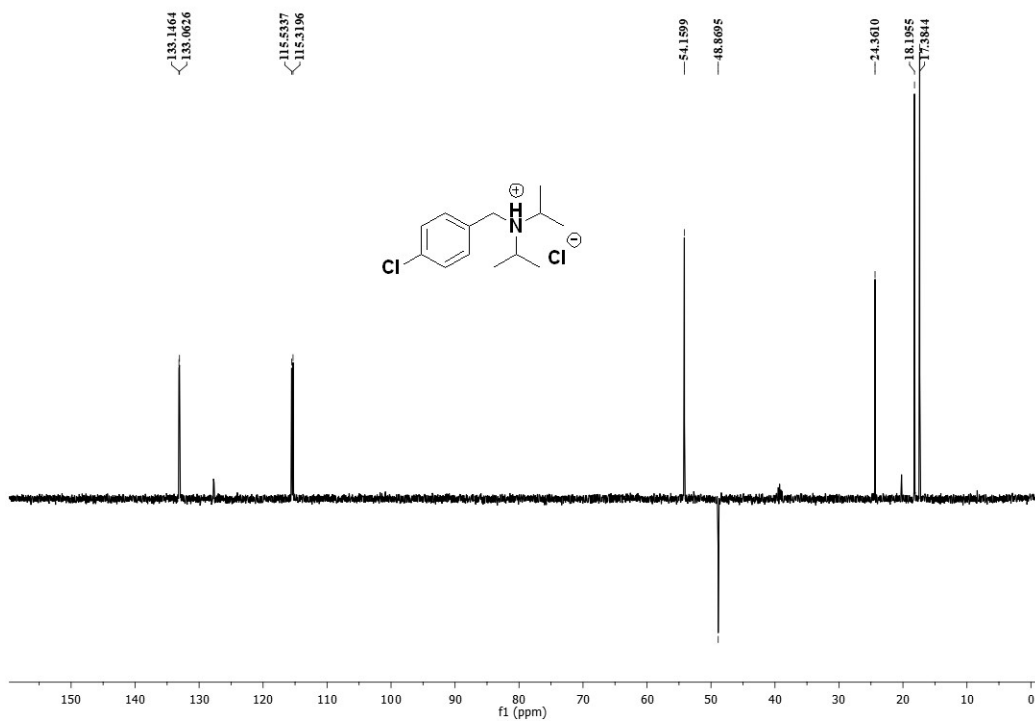

Figure FS66. <sup>13</sup>C- DEPT NMR spectra of compound (3r).

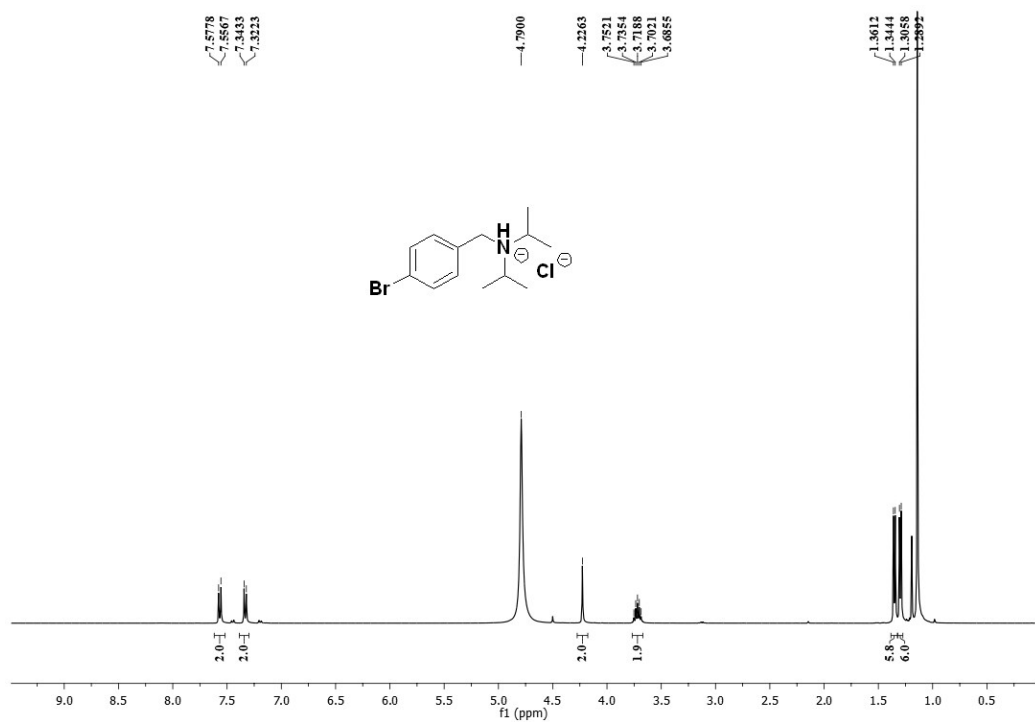

Figure FS67. <sup>1</sup>H NMR spectra of compound (3s).



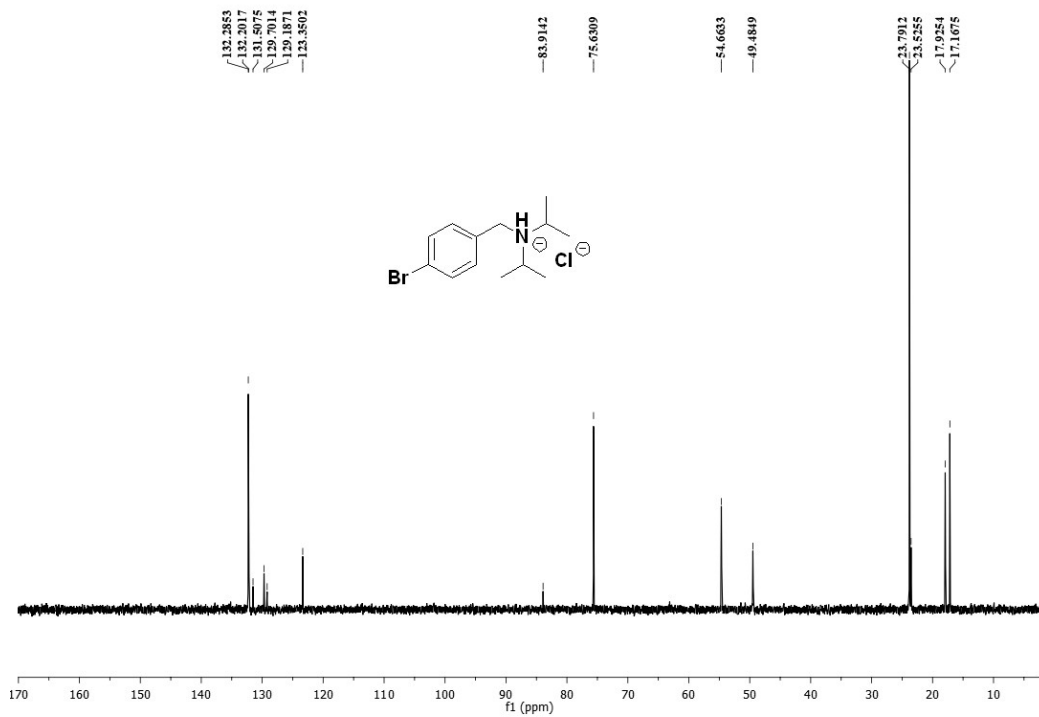

**Figure FS68.**  $^{13}\text{C}$  NMR spectra of compound (3s).

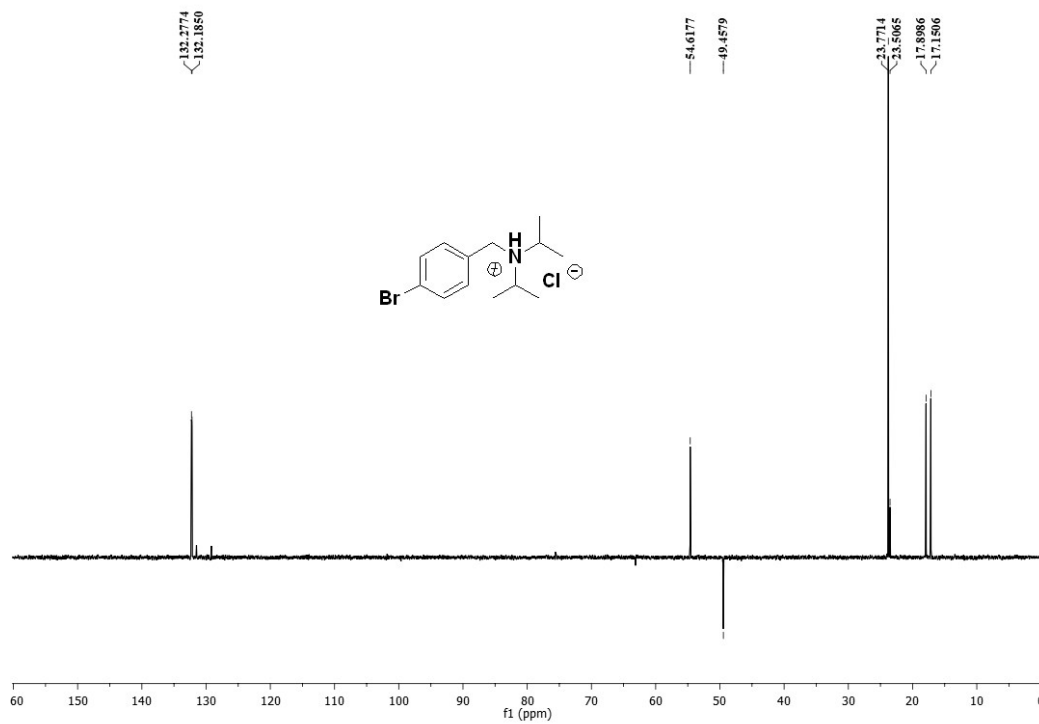

**Figure FS69.**  $^{13}\text{C}$ -DEPT NMR spectra of compound (3s).

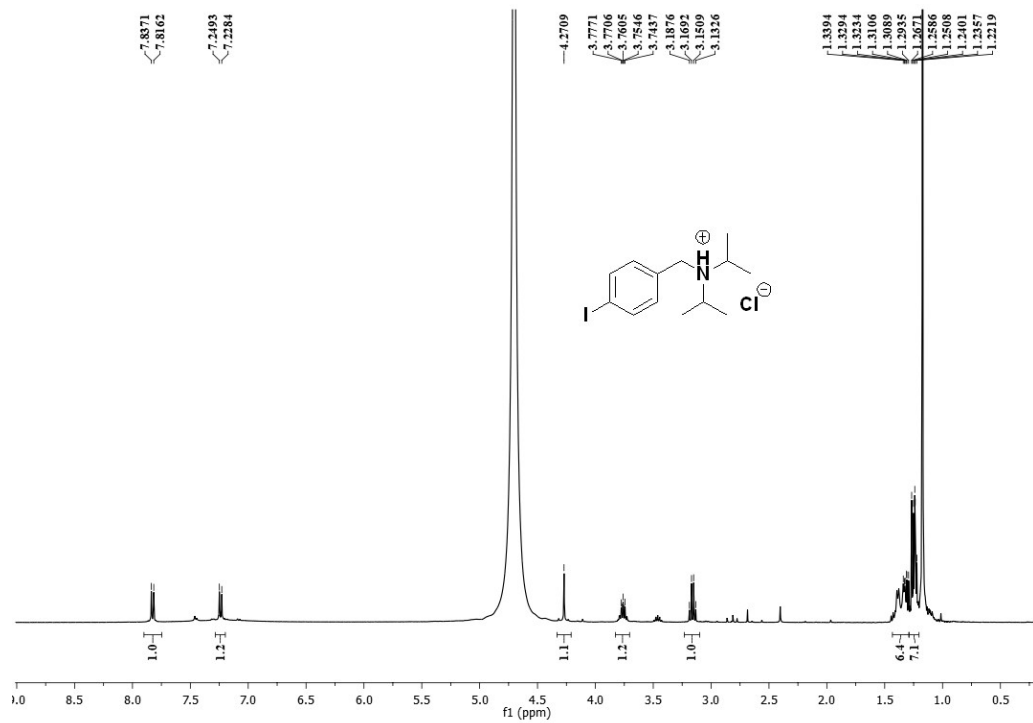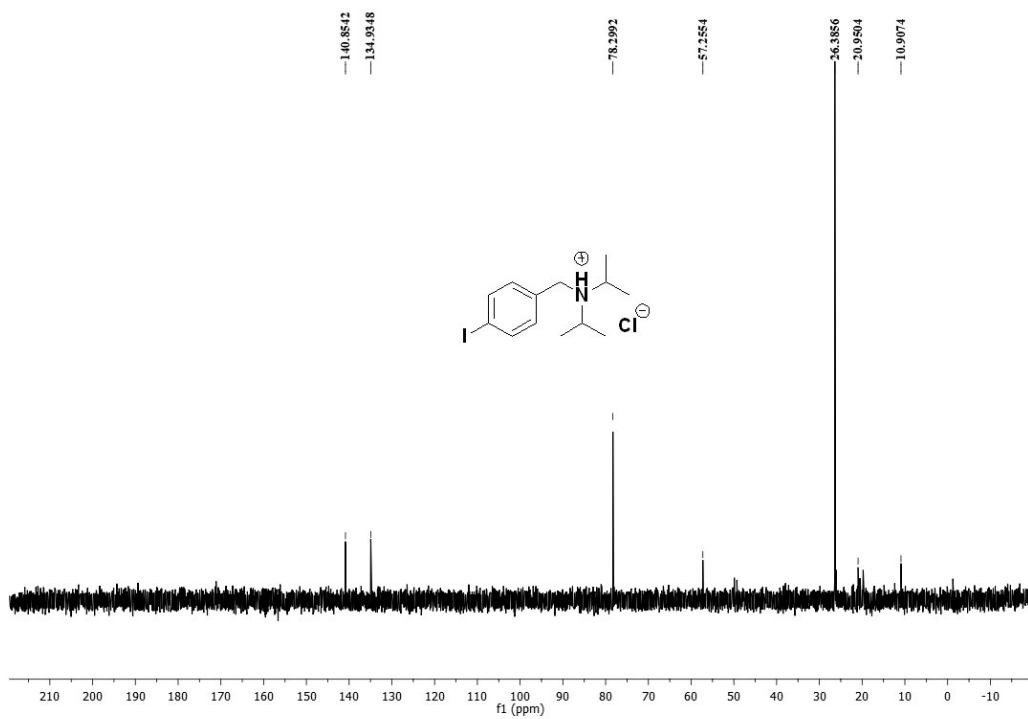

**Figure FS71. <sup>13</sup>C NMR spectra of compound (3t).**

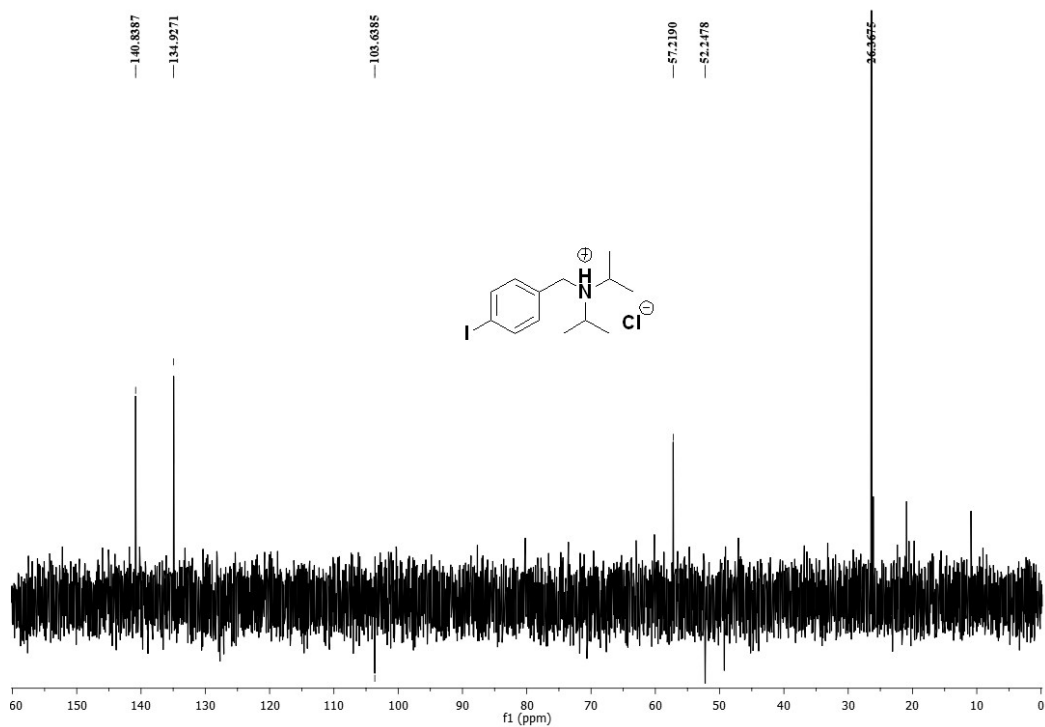

Figure FS72.  $^{13}\text{C}$ -DEPT NMR spectra of compound (3t).

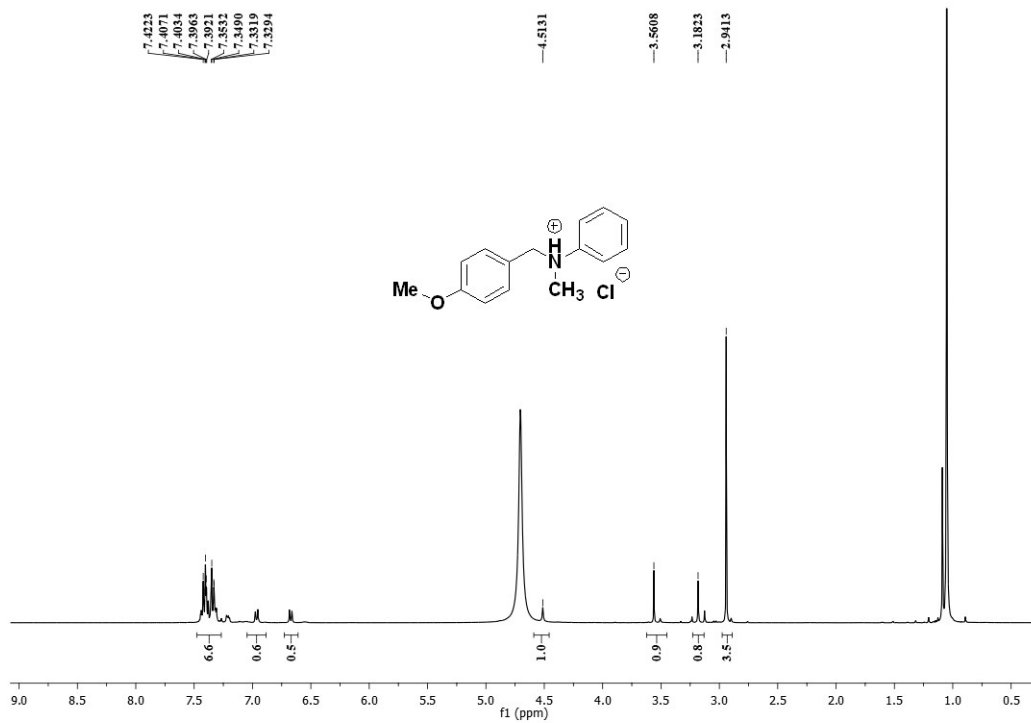

Figure FS73.  $^1\text{H}$  NMR spectra of compound (3u).

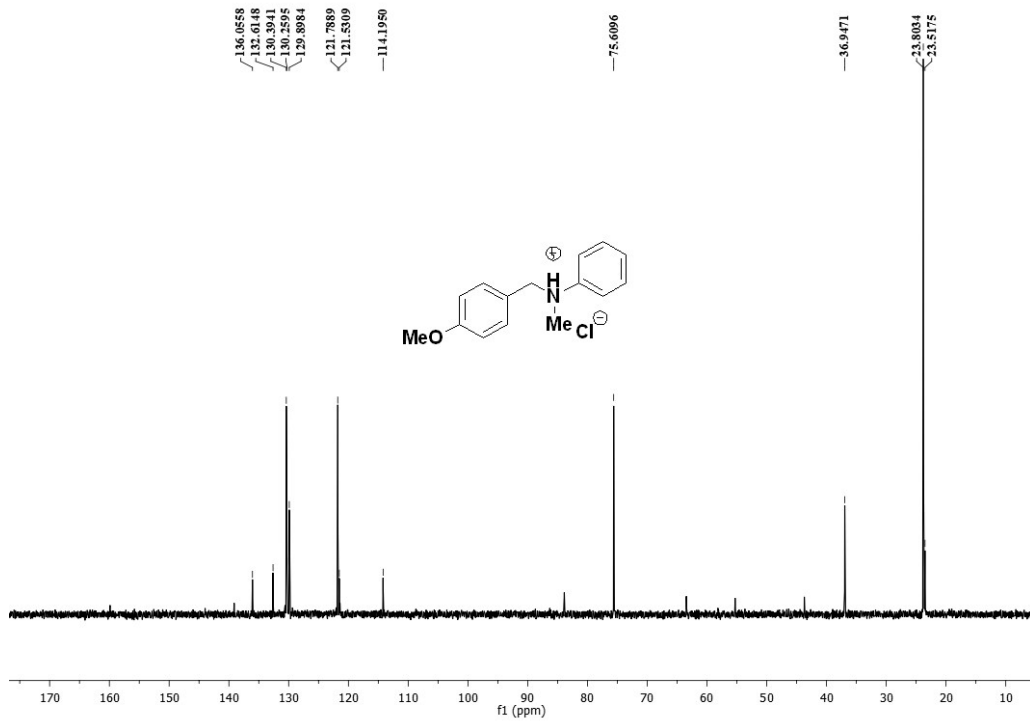

**Figure FS74.**  $^{13}\text{C}$  NMR spectra of compound (3u).

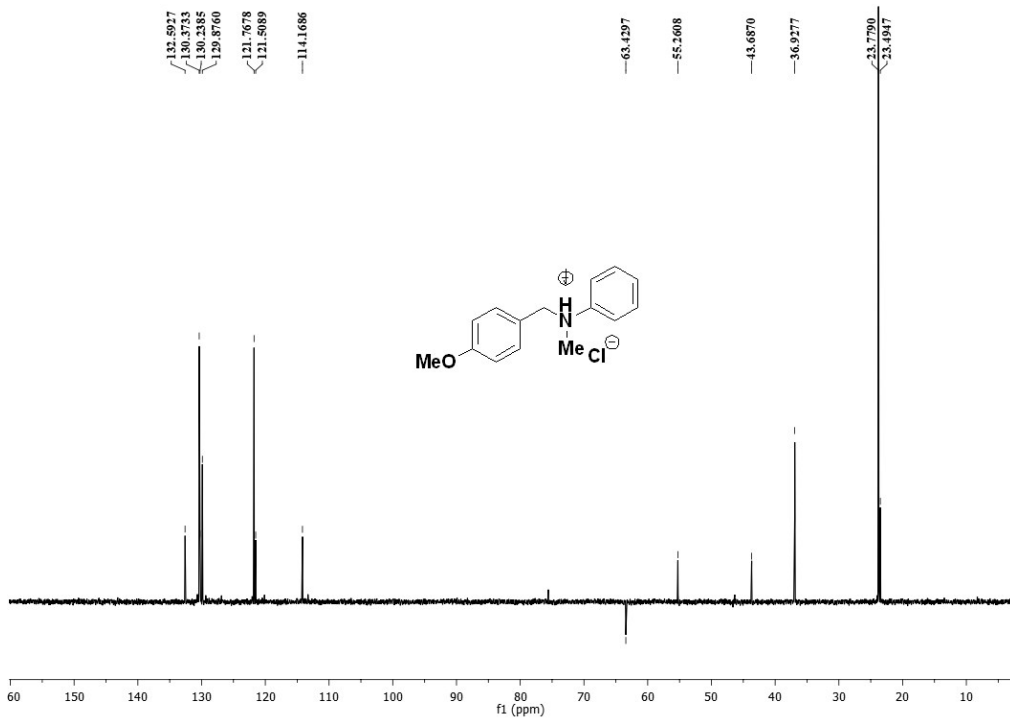

**Figure FS75.**  $^{13}\text{C}$ -DEPT NMR spectra of compound (3u).

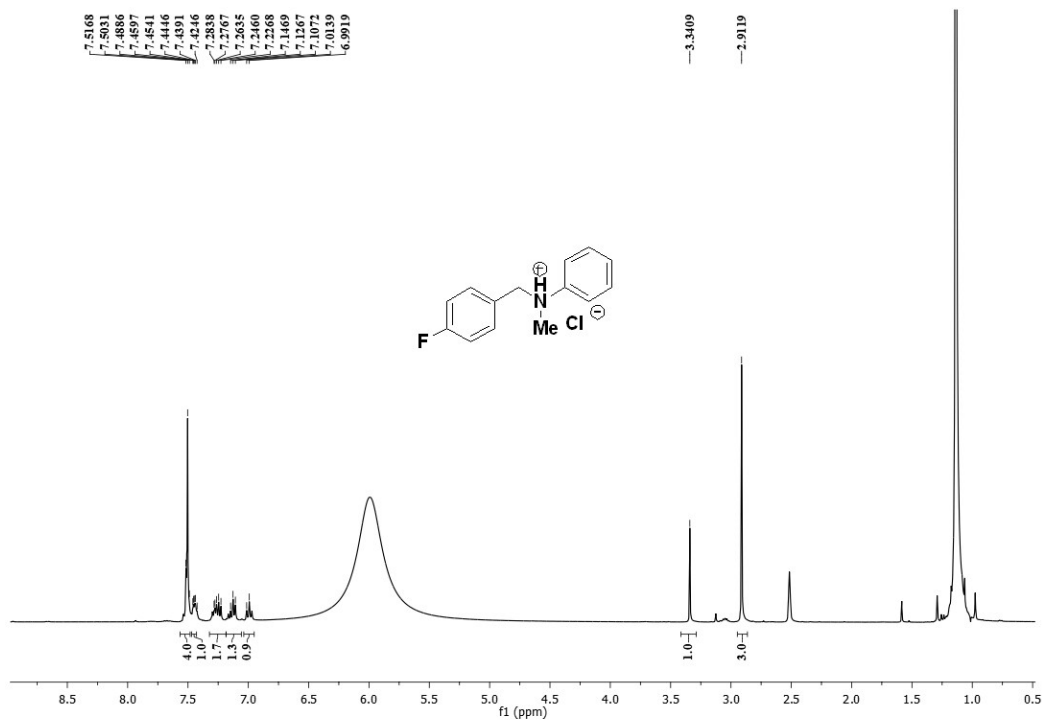

Figure FS76.  $^1\text{H}$  NMR spectra of compound (3v).

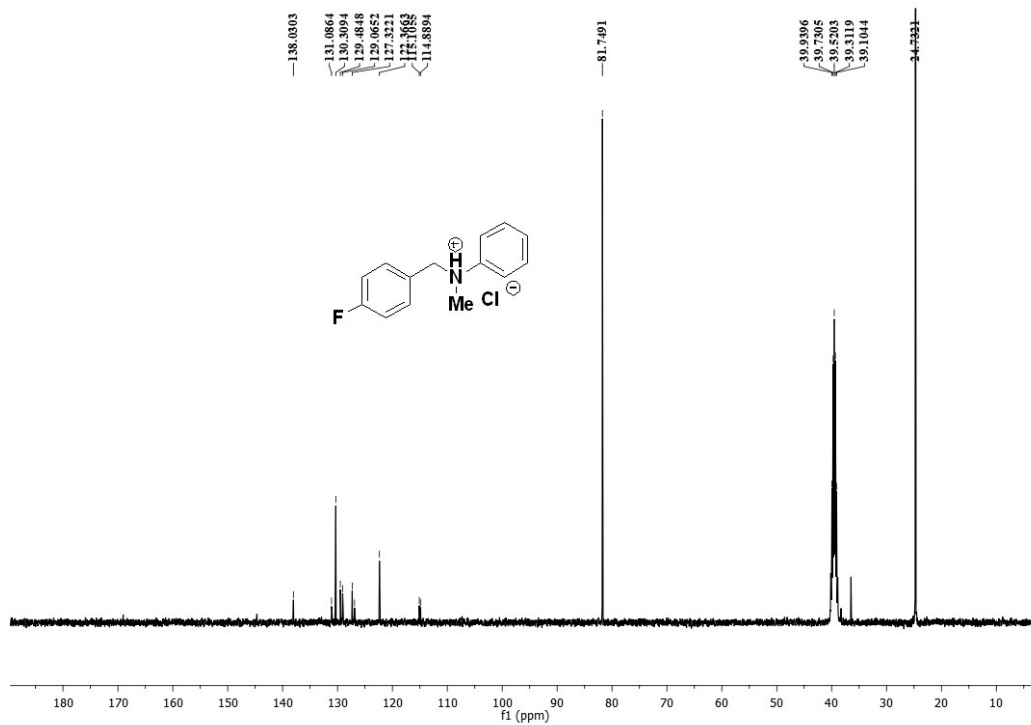

Figure FS77.  $^{13}\text{C}$  NMR spectra of compound (3v).

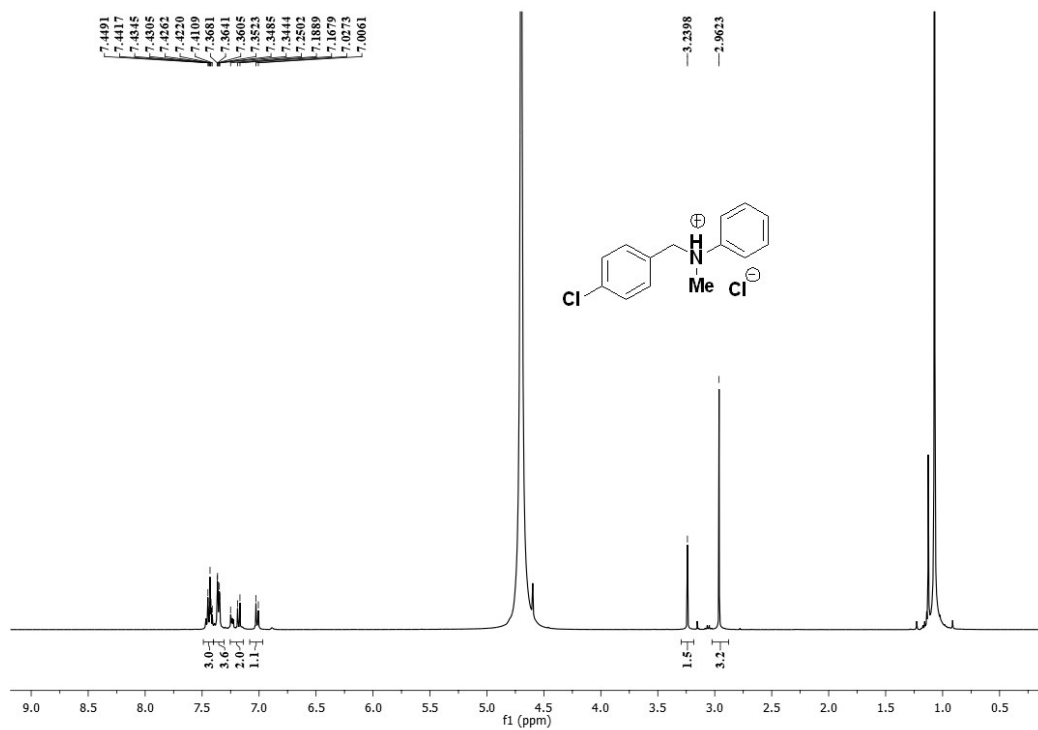

Figure FS78. <sup>1</sup>H NMR spectra of compound (3w).

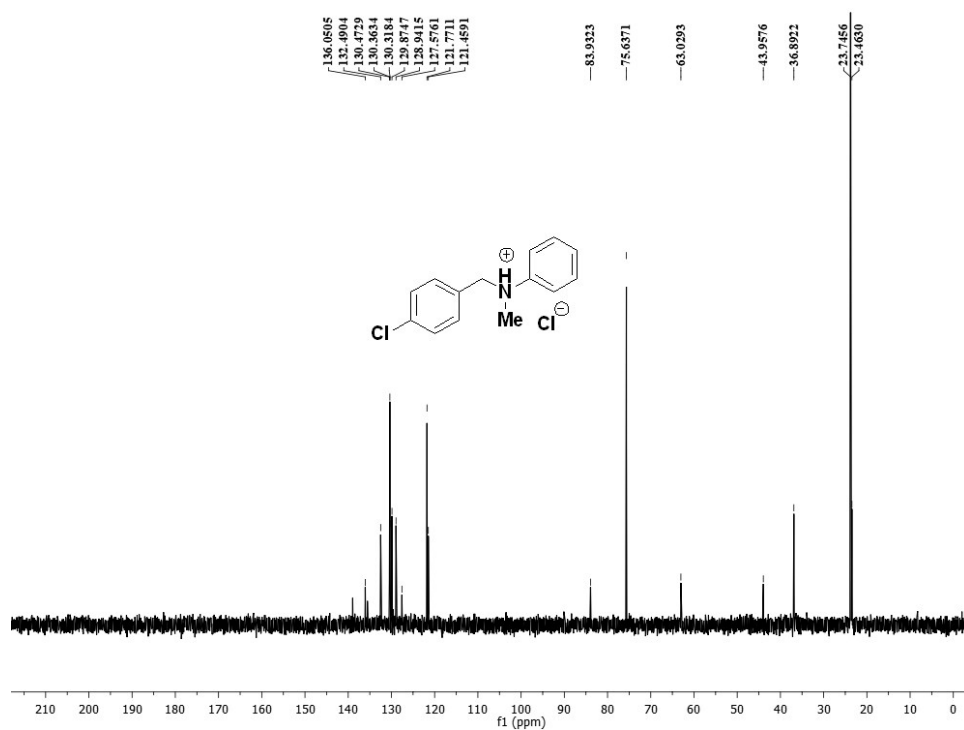

Figure FS79. <sup>13</sup>C NMR spectra of compound (3w).

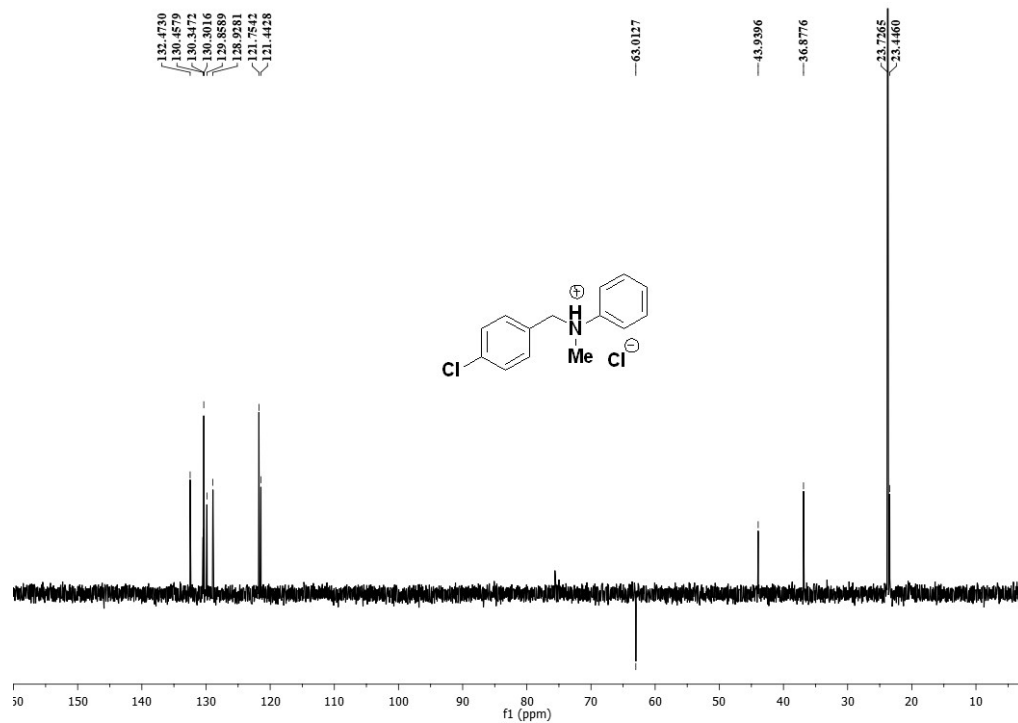

Figure FS80. <sup>13</sup>C-DEPT NMR spectra of compound (3w).

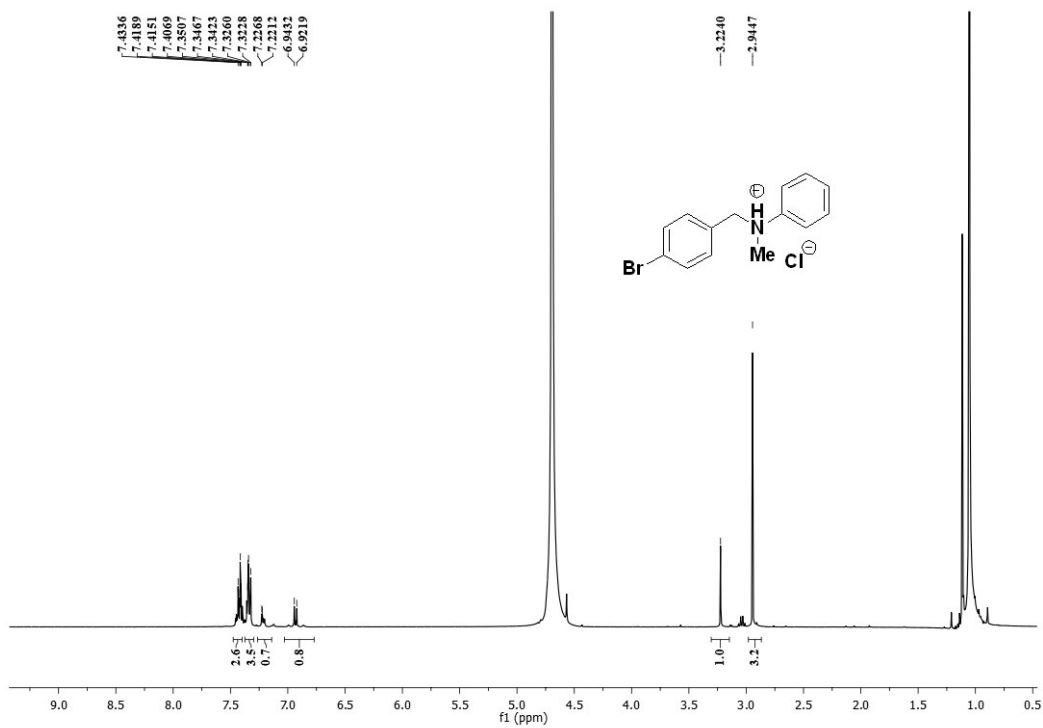

Figure FS81. <sup>1</sup>H NMR spectra of compound (3x).

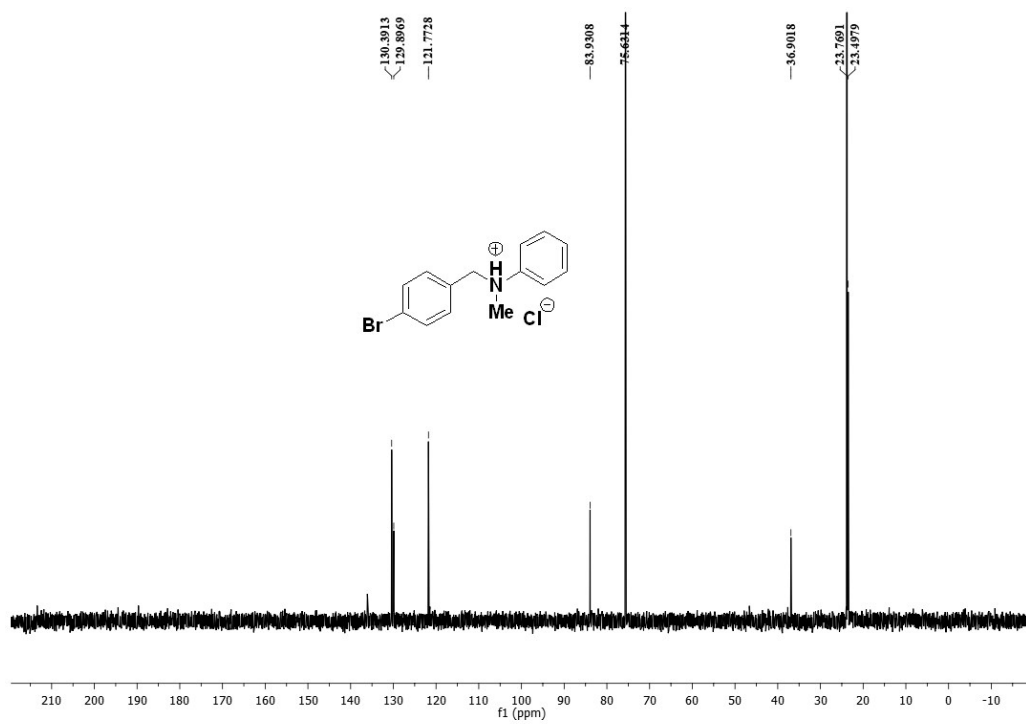

Figure FS82. <sup>13</sup>C NMR spectra of compound (3x).

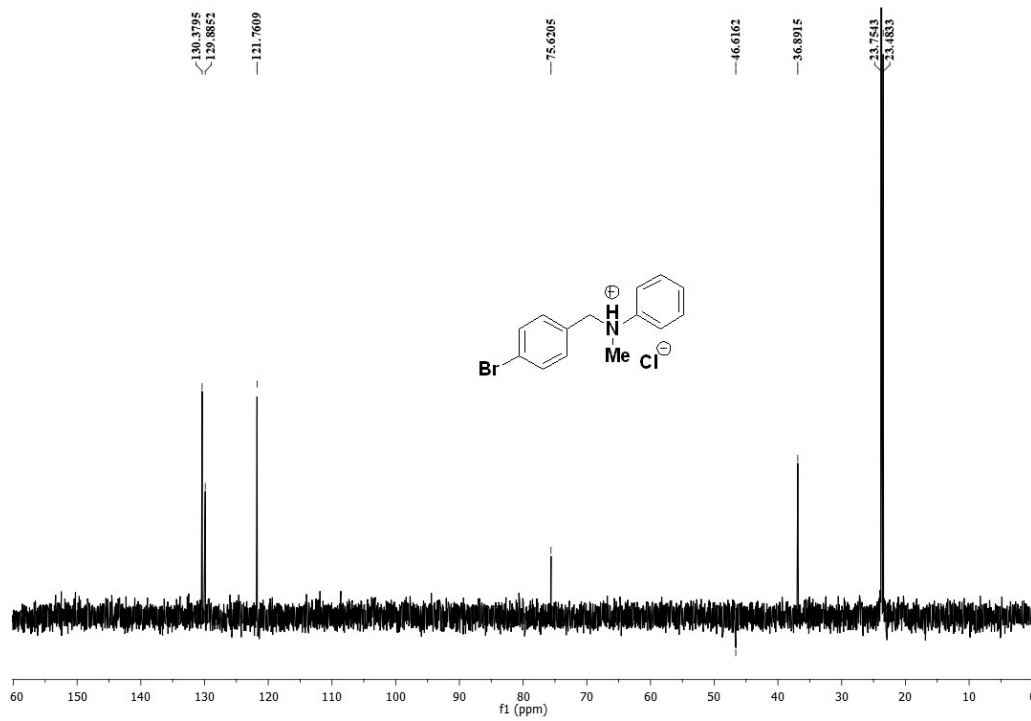

Figure FS83. <sup>13</sup>C-DEPT NMR spectra of compound (3x).



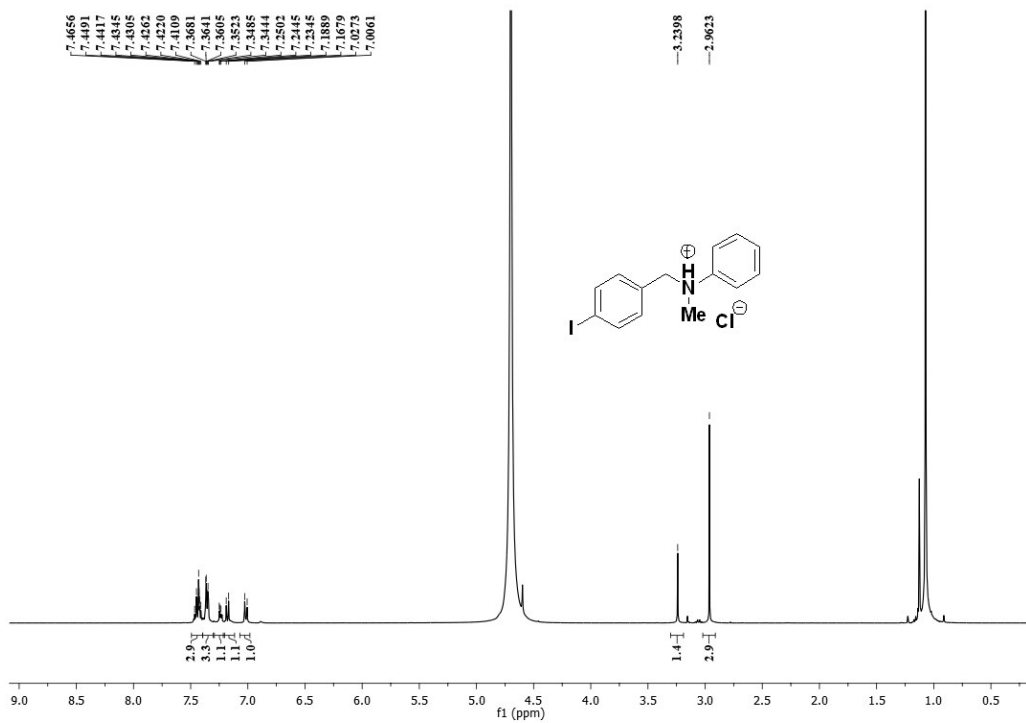

Figure FS84. <sup>1</sup>H NMR spectra of compound (3y).

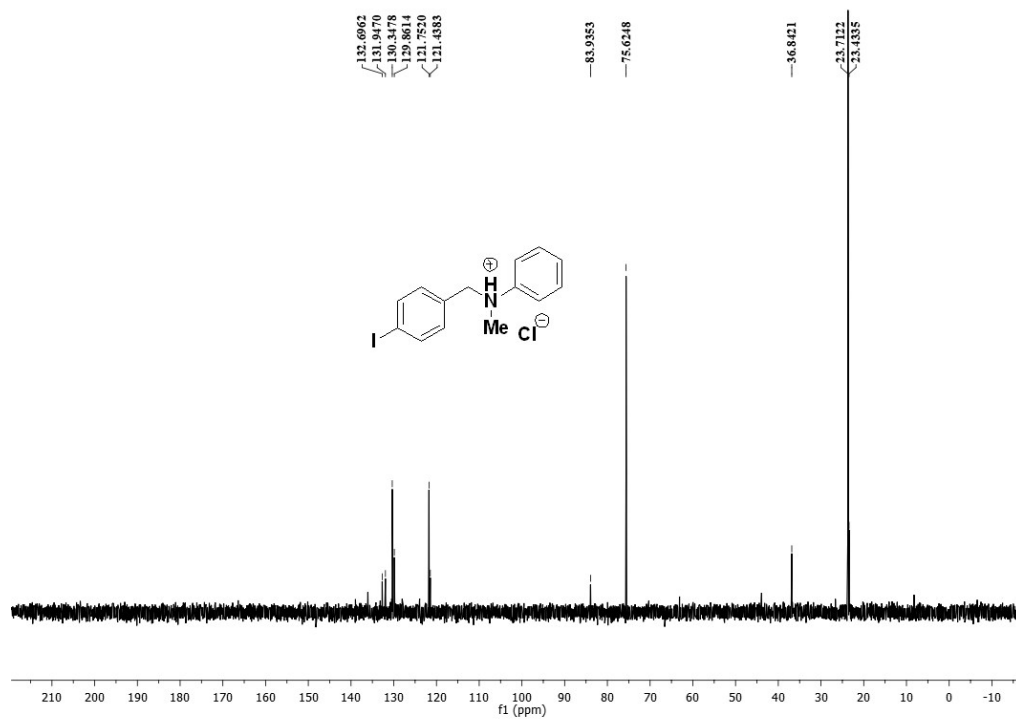

Figure FS85. <sup>13</sup>C NMR spectra of compound (3y).

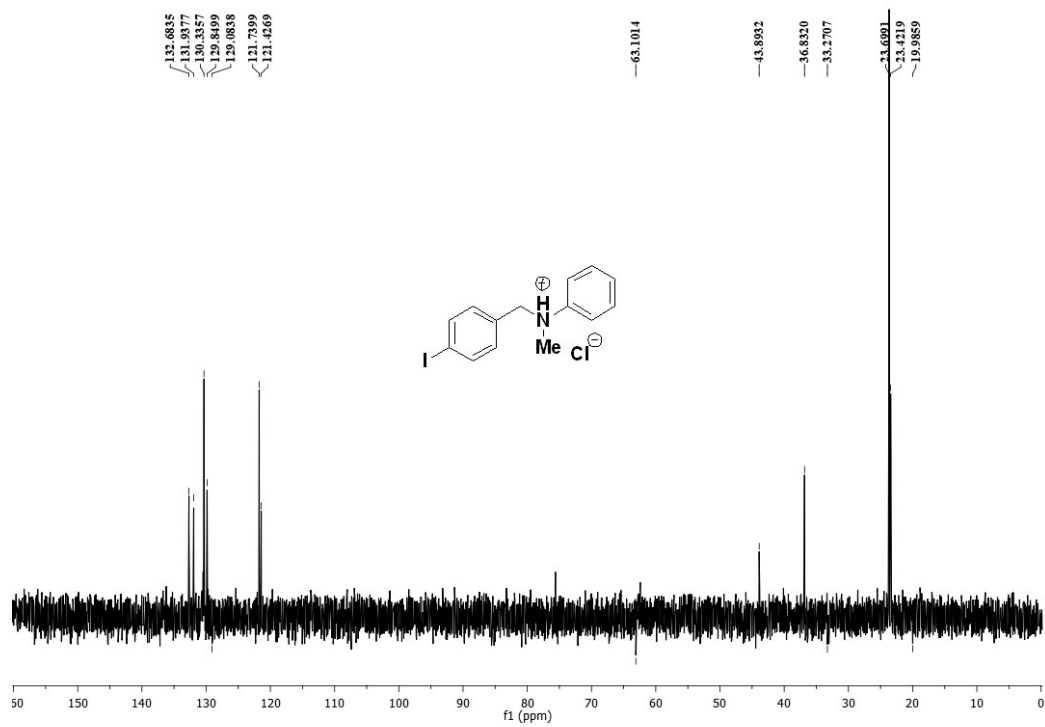

Figure FS86. <sup>13</sup>C NMR spectra of compound (3y).

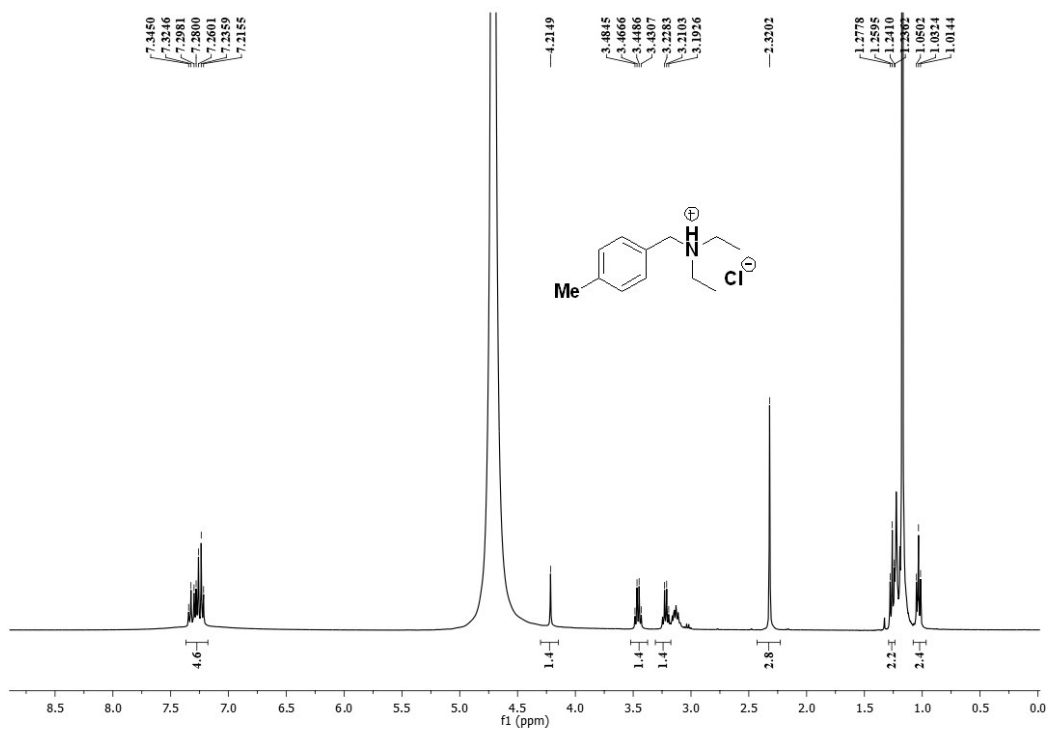

Figure FS87. <sup>1</sup>H NMR spectra of compound (3z).

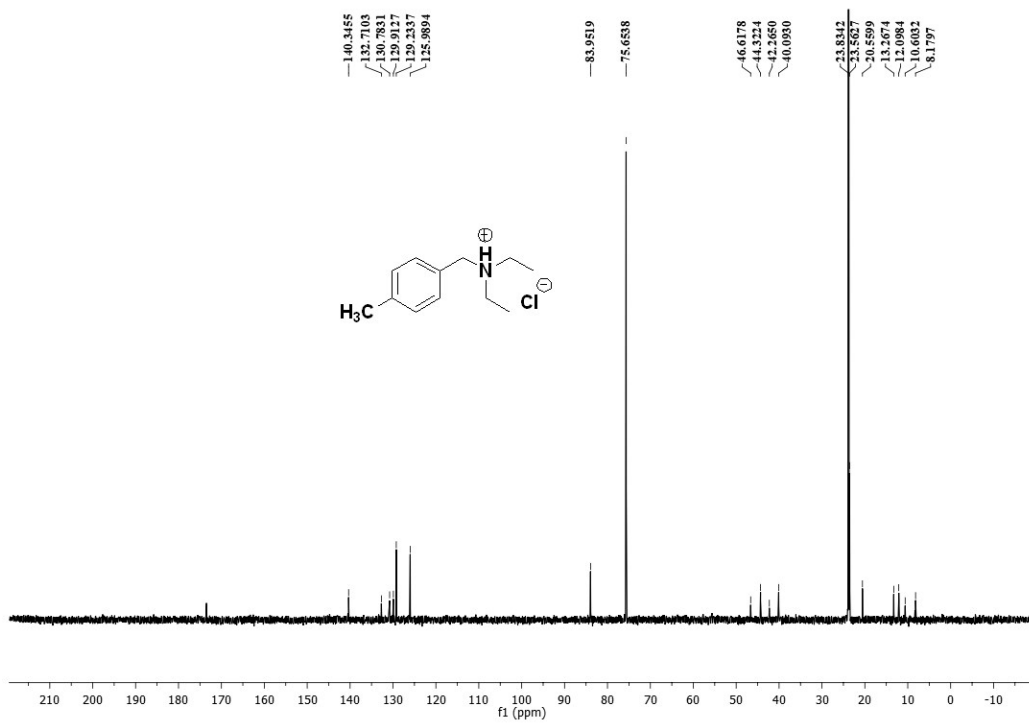

Figure FS88. <sup>13</sup>C NMR spectra of compound (3z).

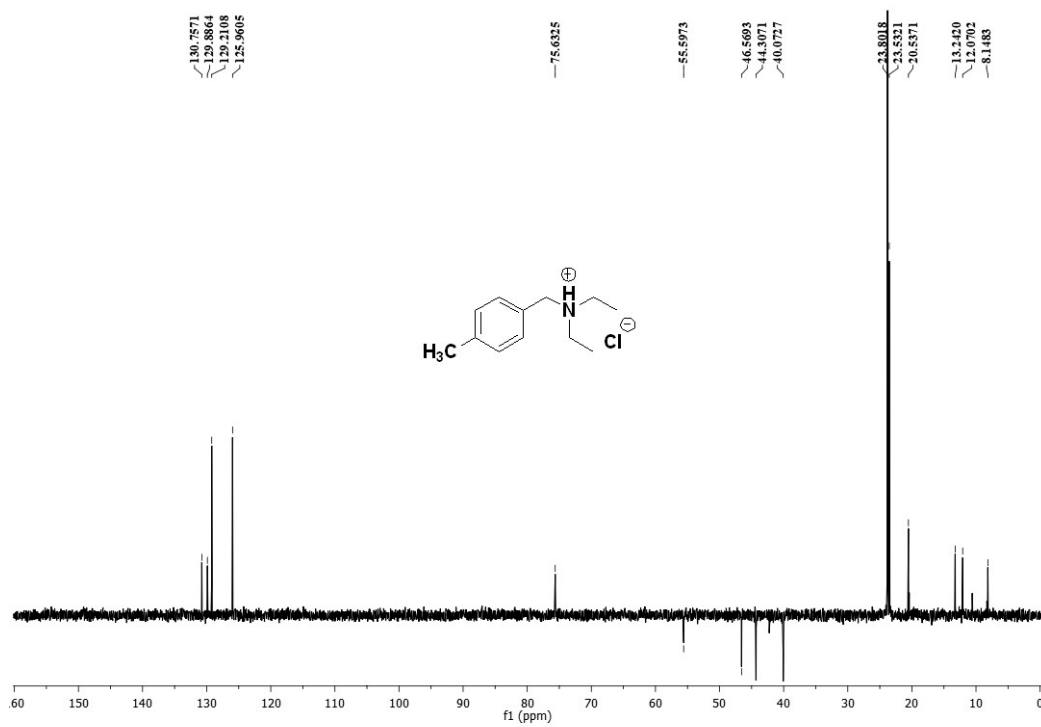

Figure FS89. <sup>13</sup>C-DEPT NMR spectra of compound (3z).

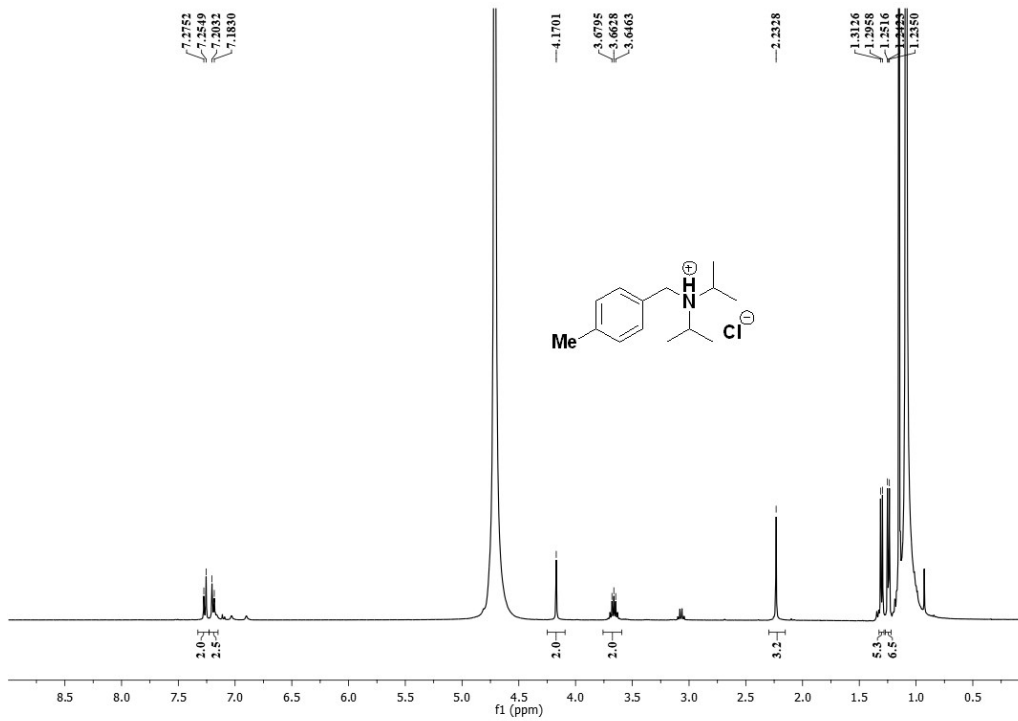

Figure FS90. <sup>1</sup>H NMR spectra of compound (3za).

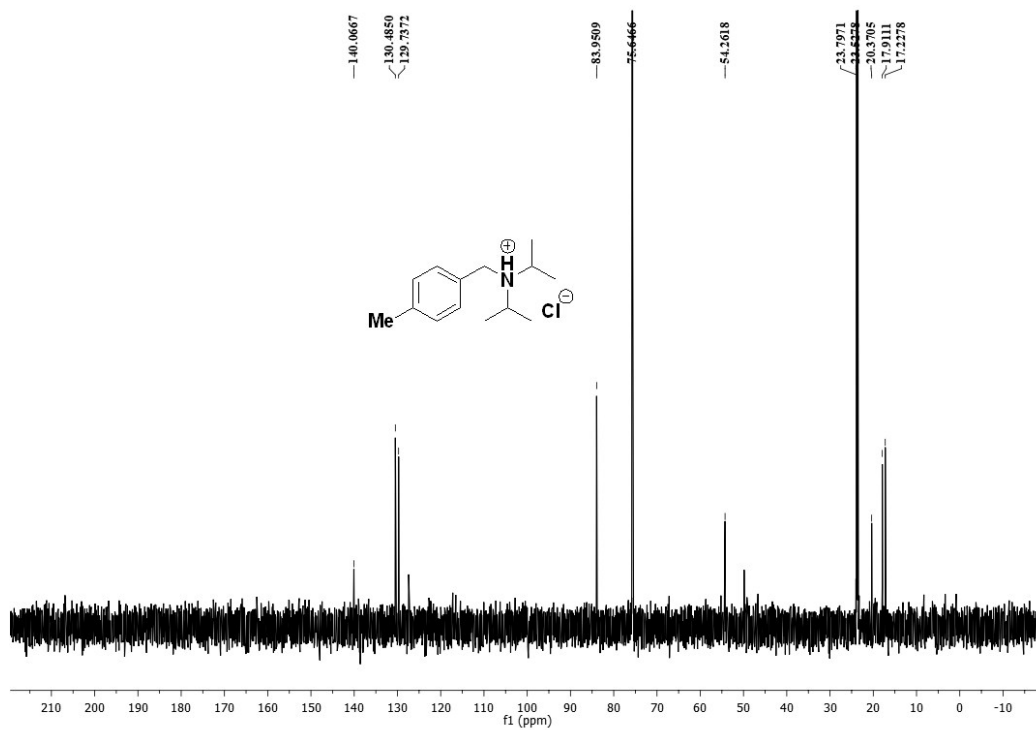

Figure FS91. <sup>13</sup>C NMR spectra of compound (3za).

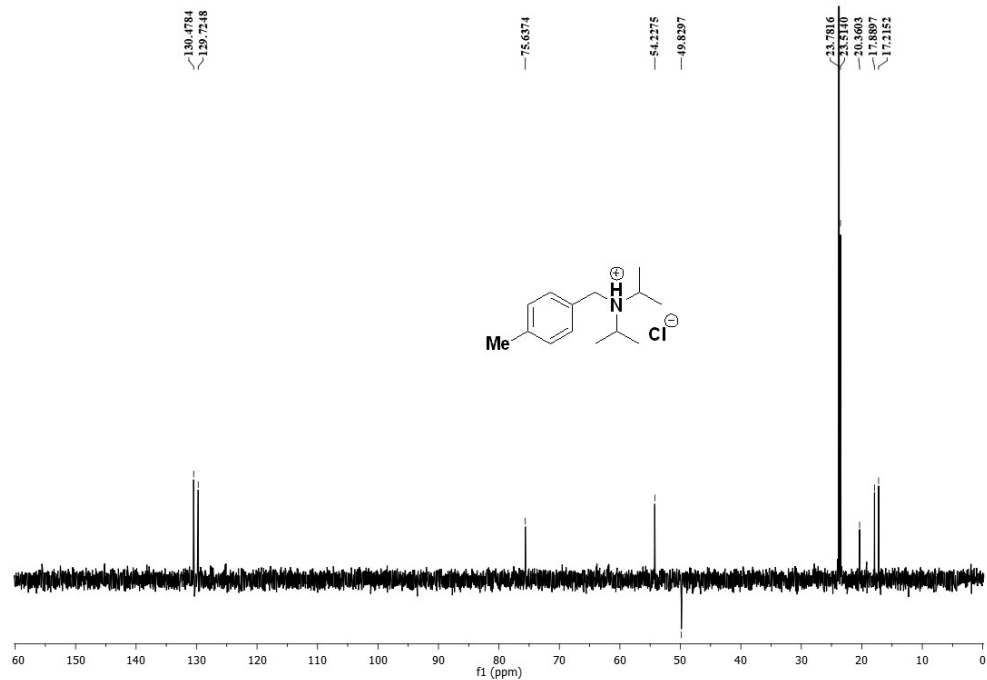

Figure FS92. <sup>13</sup>C-DEPT NMR spectra of compound (3za).

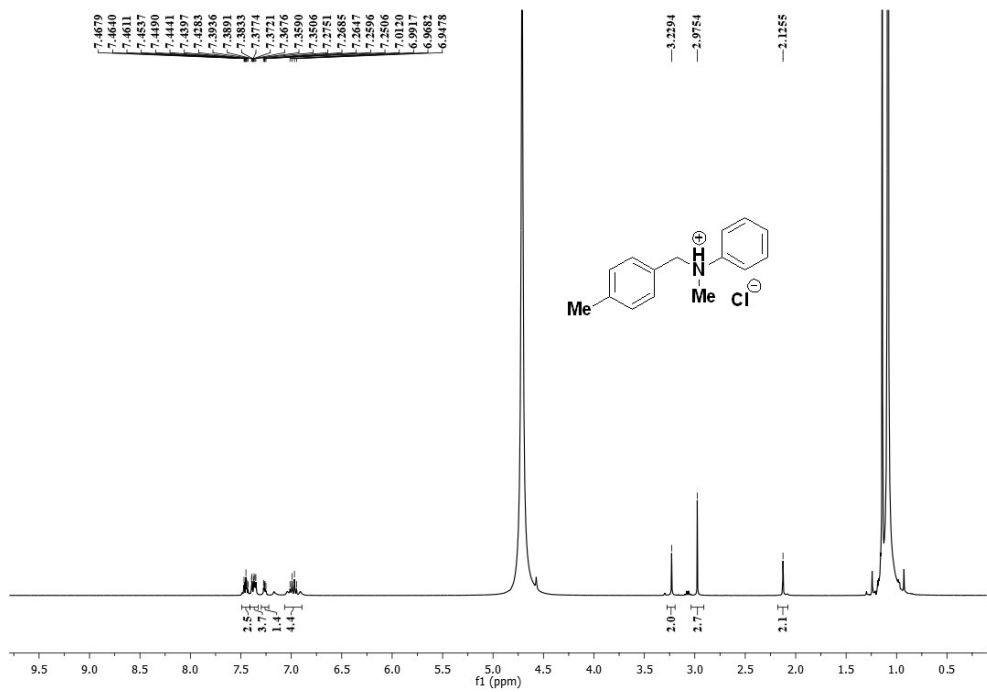

Figure FS93. <sup>1</sup>H NMR spectra of compound (3zb).

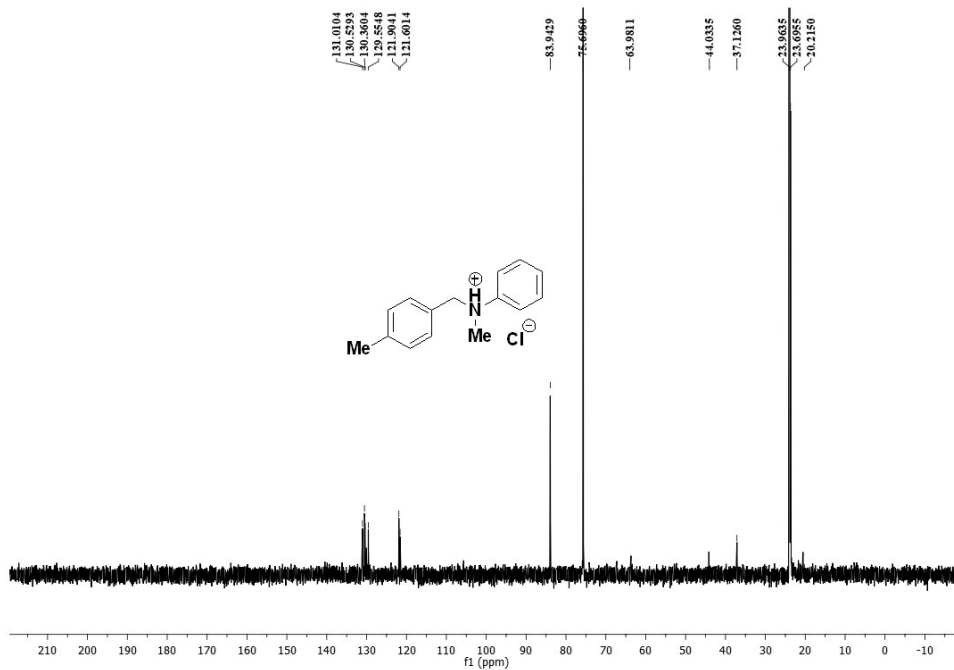

Figure FS94. <sup>13</sup>C NMR spectra of compound (3zb).

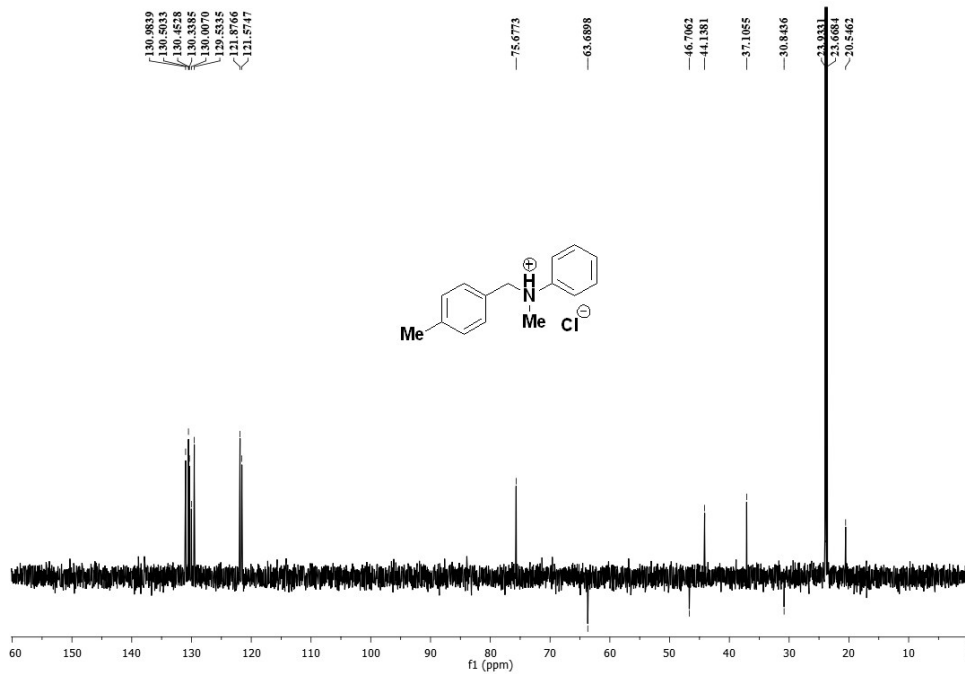

Figure FS95. <sup>13</sup>C-DEPT NMR spectra of compound (3zb).

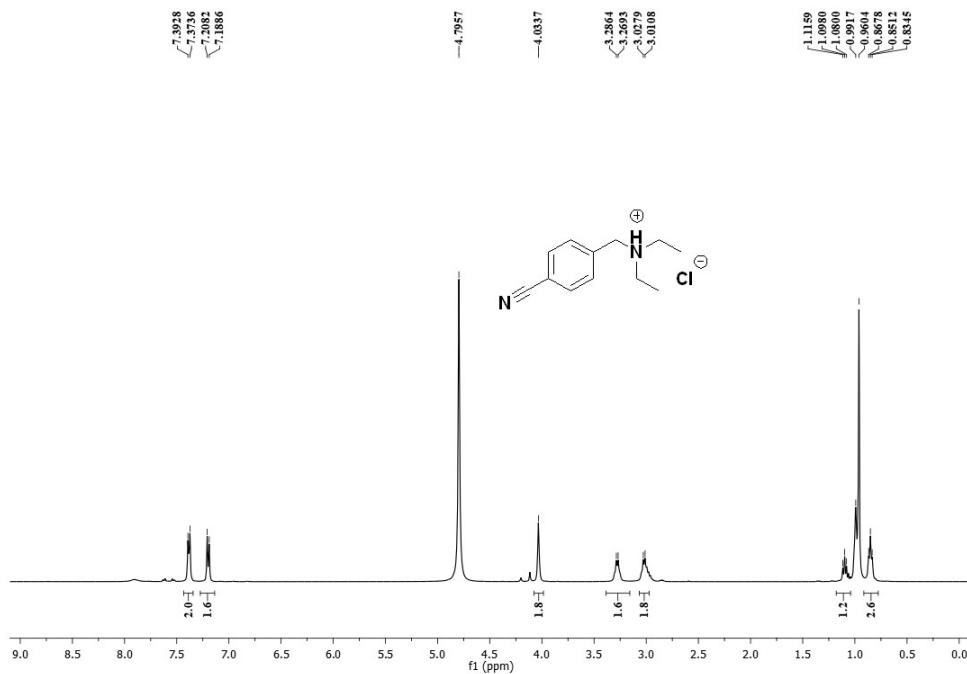

Figure FS96. <sup>1</sup>H NMR spectra of compound (4a).

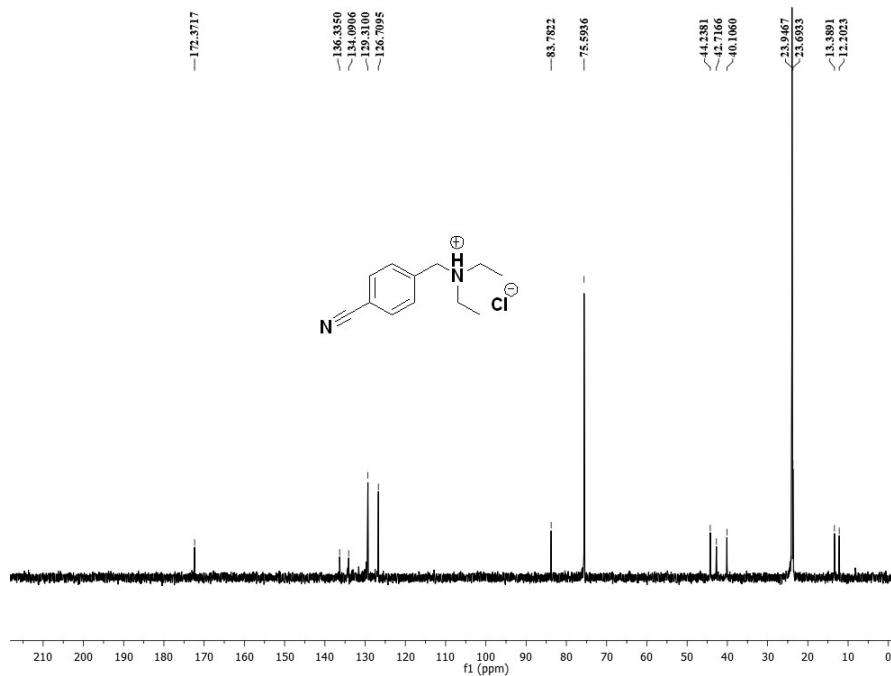

Figure FS97. <sup>13</sup>C NMR spectra of compound (4a).

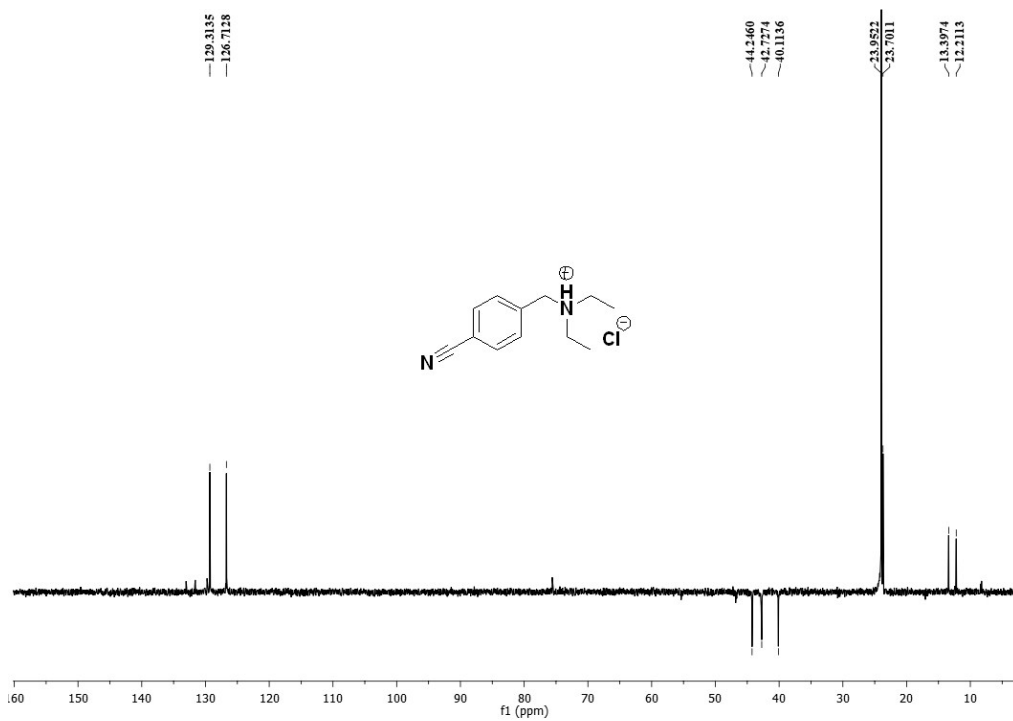

Figure FS98. <sup>13</sup>C-DEPT NMR spectra of compound (4a).

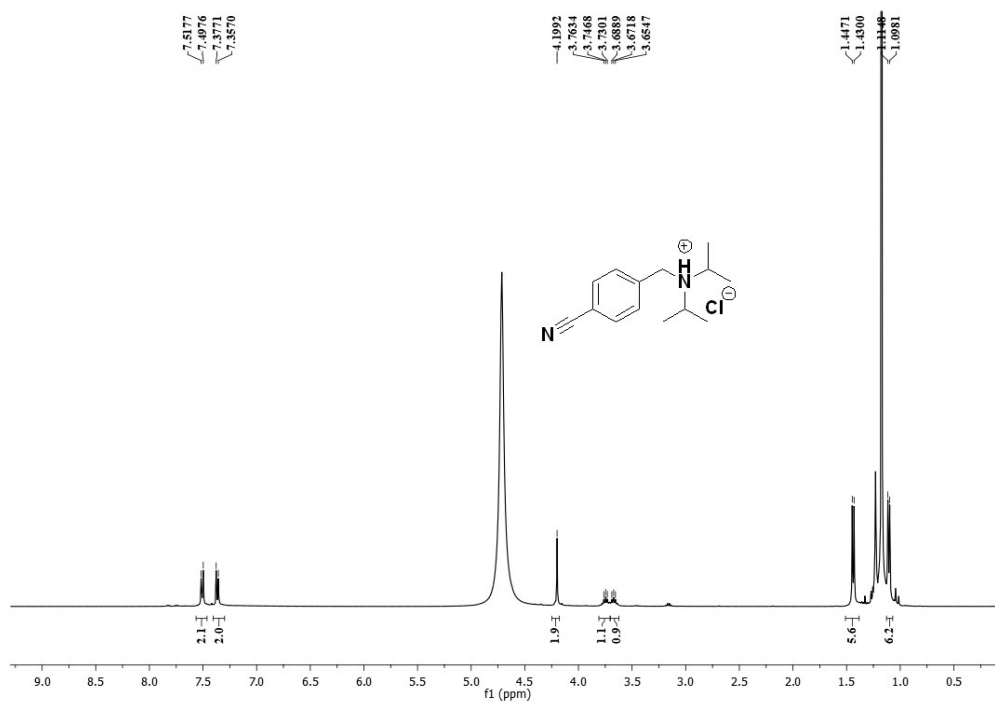

Figure FS99. <sup>1</sup>H NMR spectra of compound (4b).



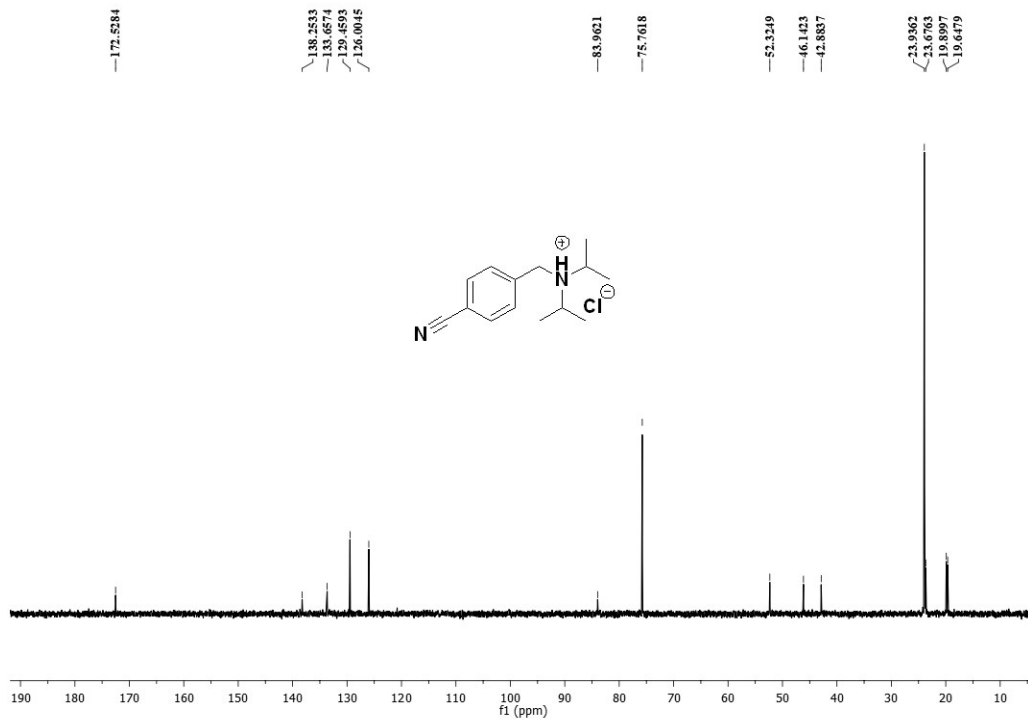

Figure FS100. <sup>13</sup>C NMR spectra of compound (4b).

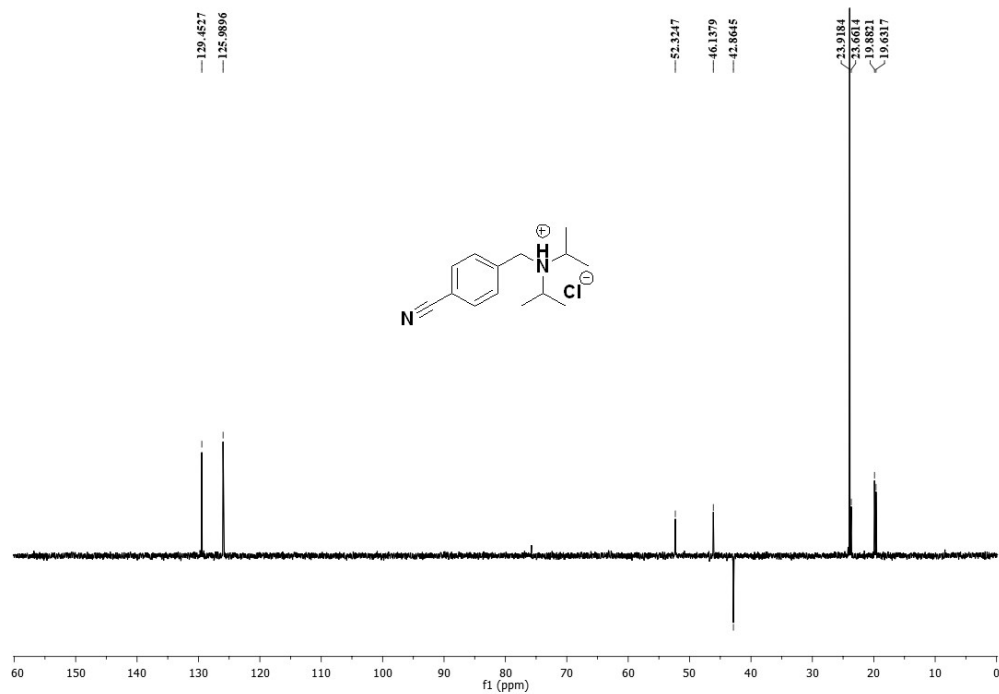

Figure FS101. <sup>13</sup>C-DEPT spectra of compound (4b).

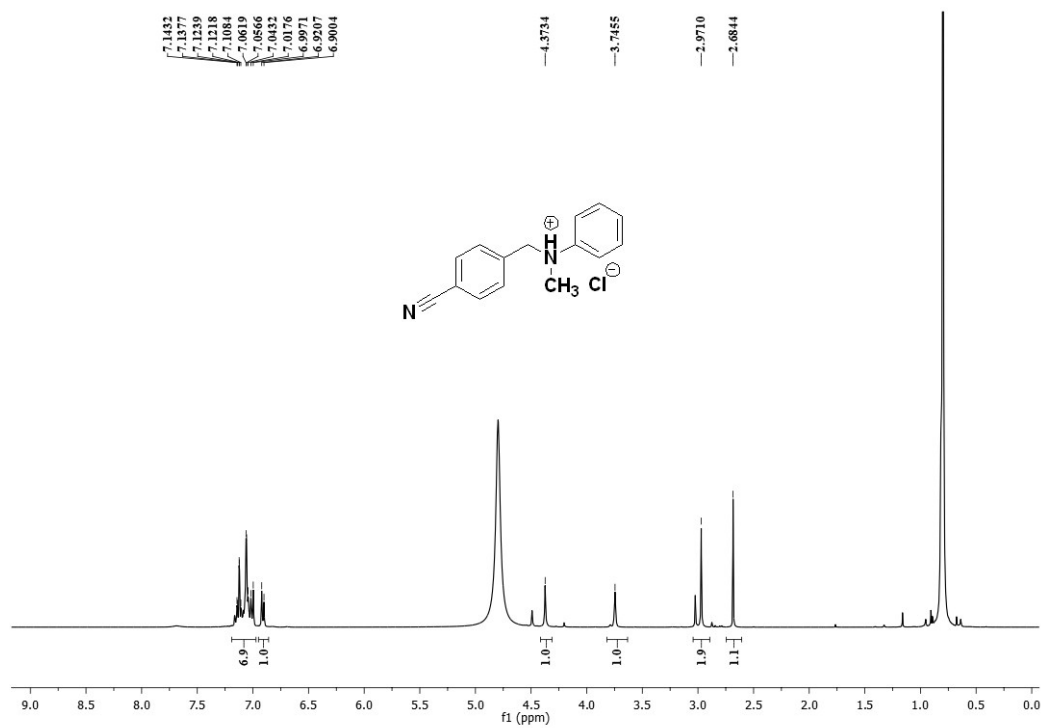

Figure FS102. <sup>1</sup>H NMR spectra of compound (4c).

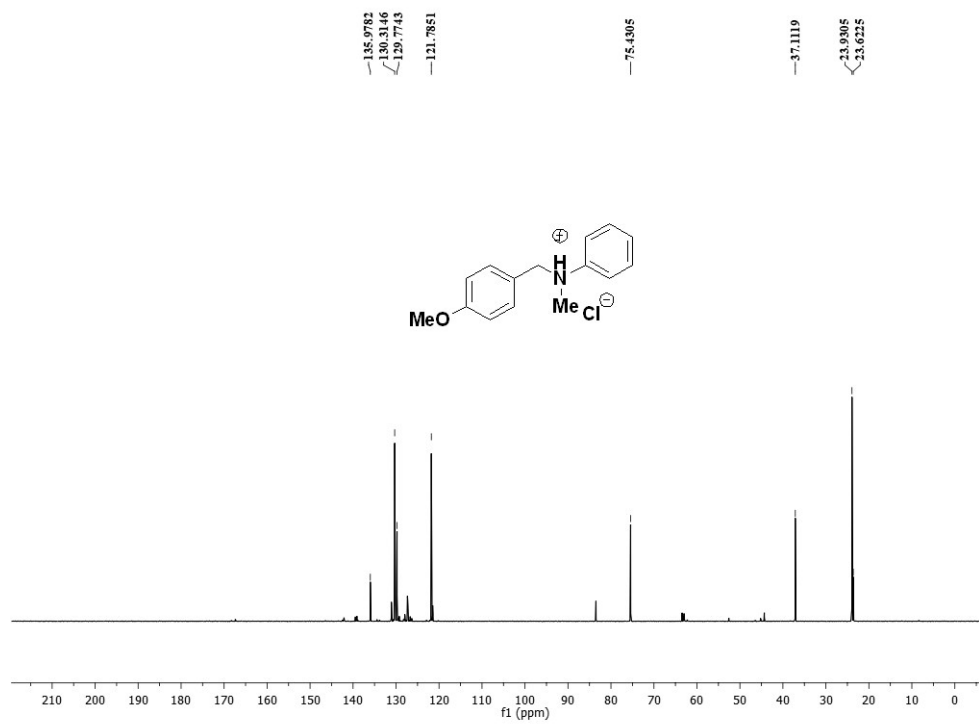

Figure FS103. <sup>13</sup>C NMR spectra of compound (4c).

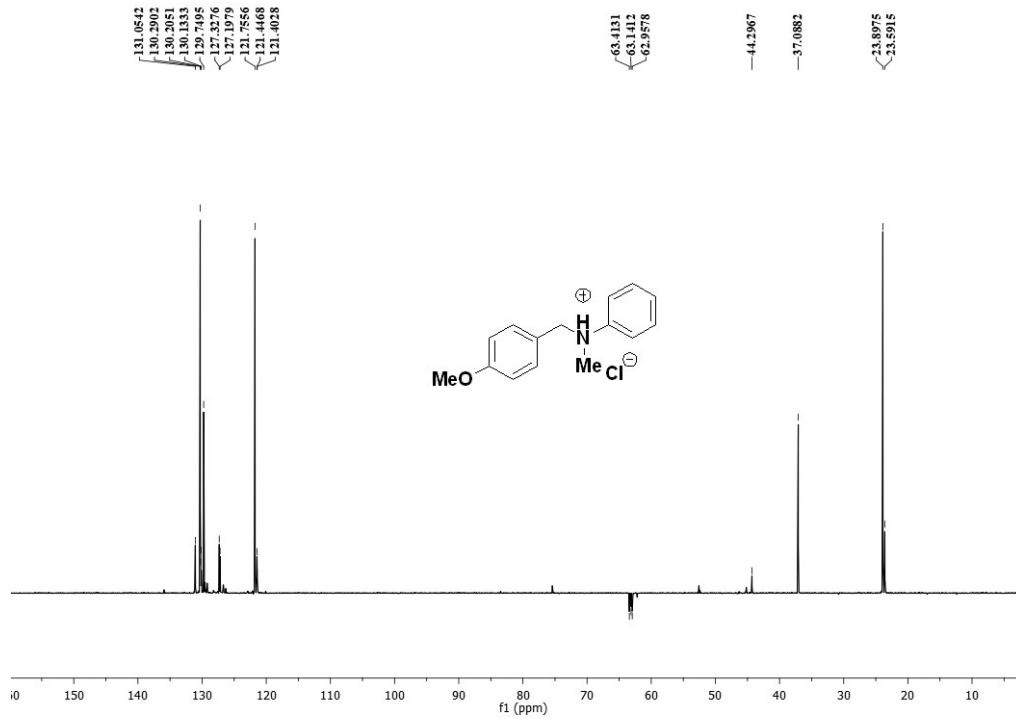

Figure FS104. <sup>13</sup>C-DEPT NMR spectra of compound (4c).

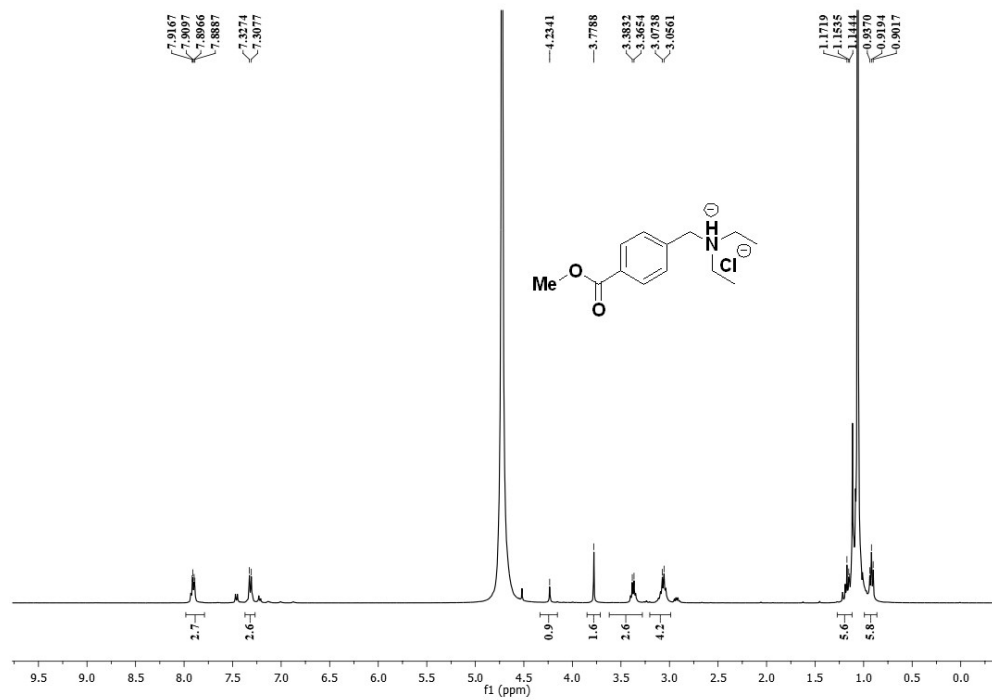

Figure FS105. <sup>1</sup>H NMR spectra of compound (4d).

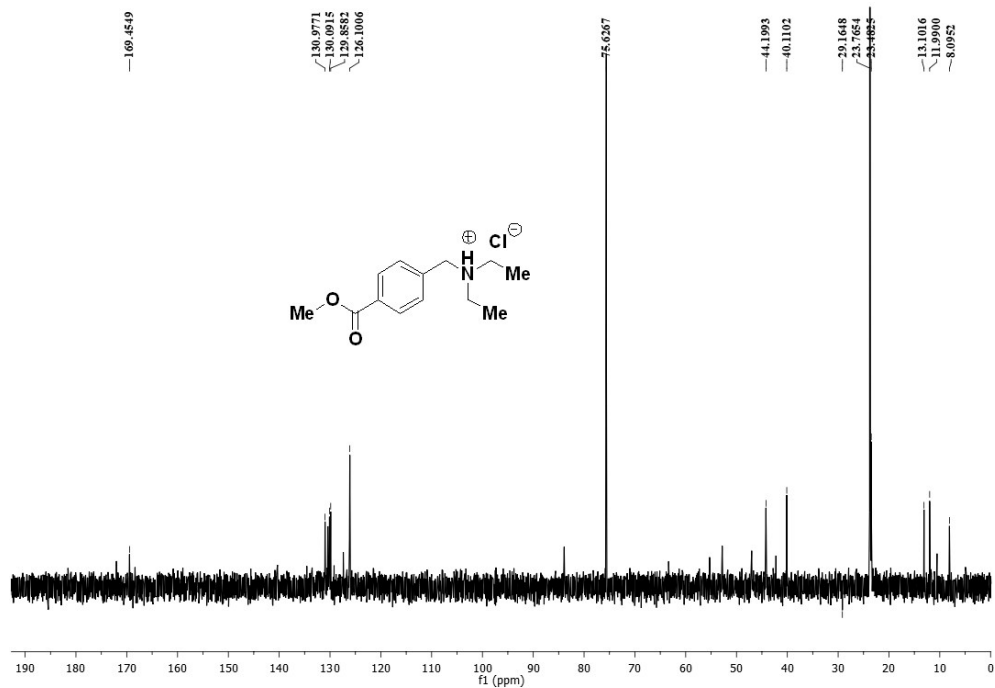

Figure FS106.  $^{13}\text{C}$  NMR spectra of compound (4d).

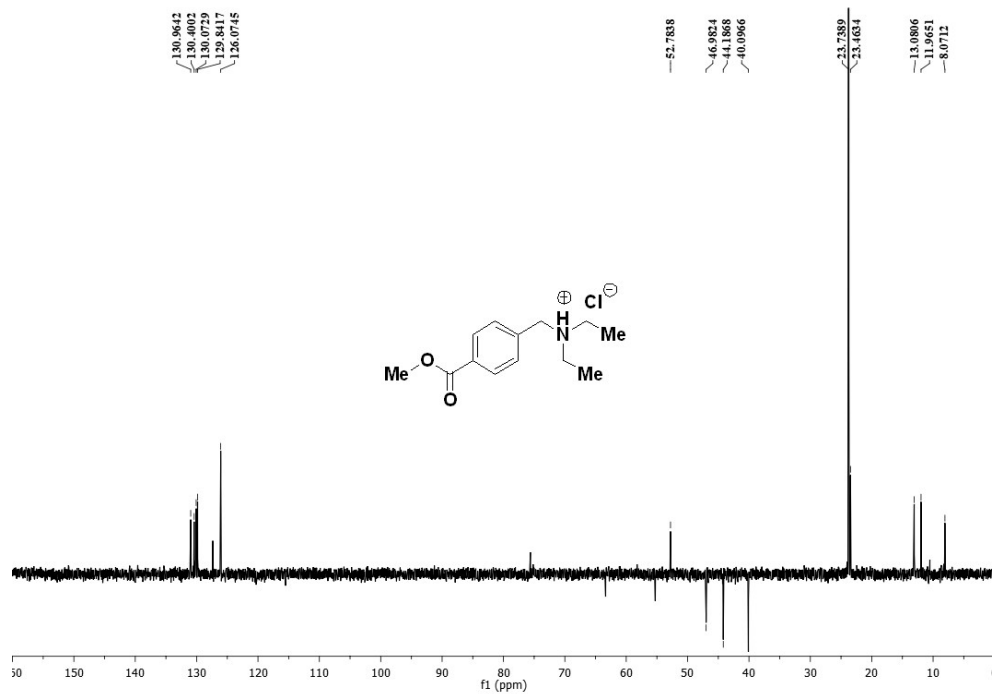

Figure FS107.  $^{13}\text{C}$ -DEPT NMR spectra of compound (4d).

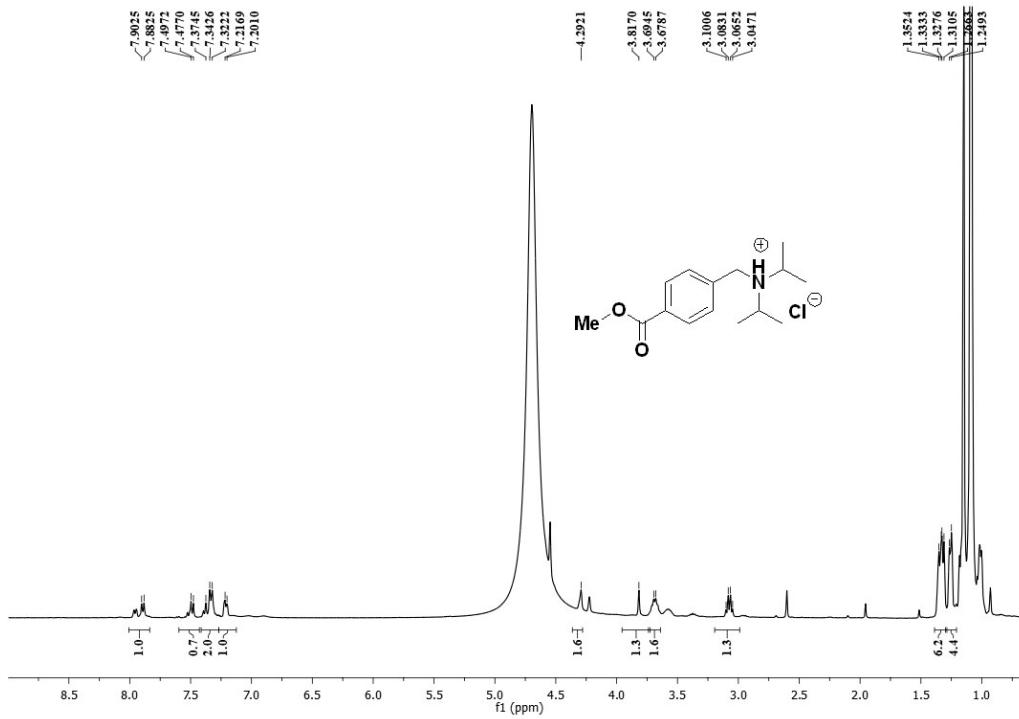

Figure FS108.  $^1\text{H}$  NMR spectra of compound (4e).

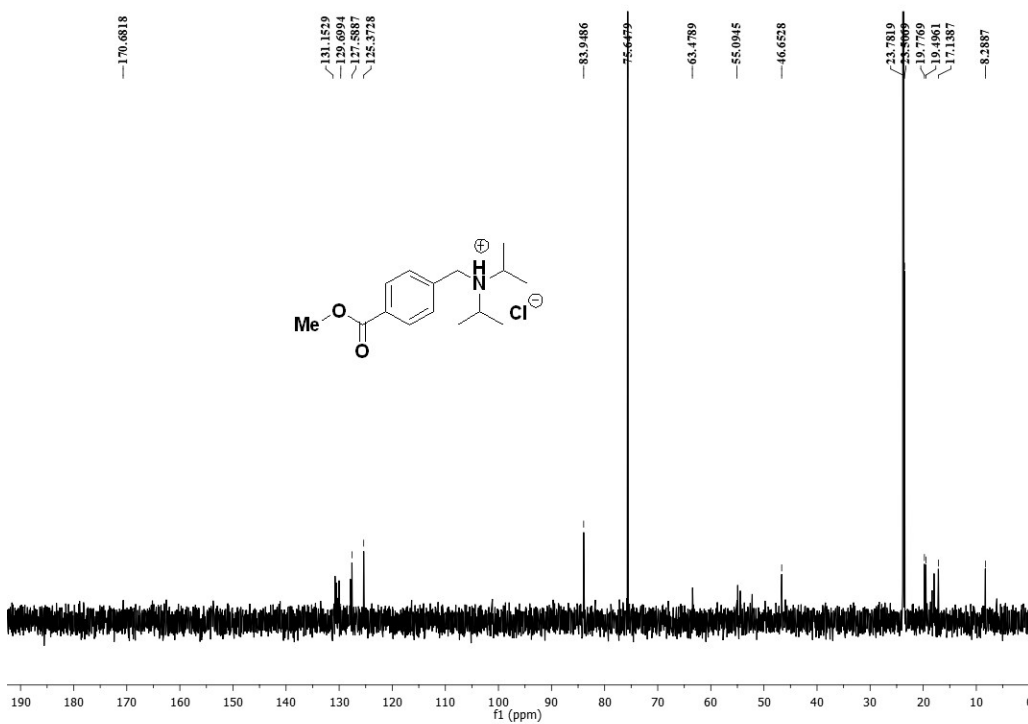

Figure FS109.  $^{13}\text{C}$  NMR spectra of compound (4e).

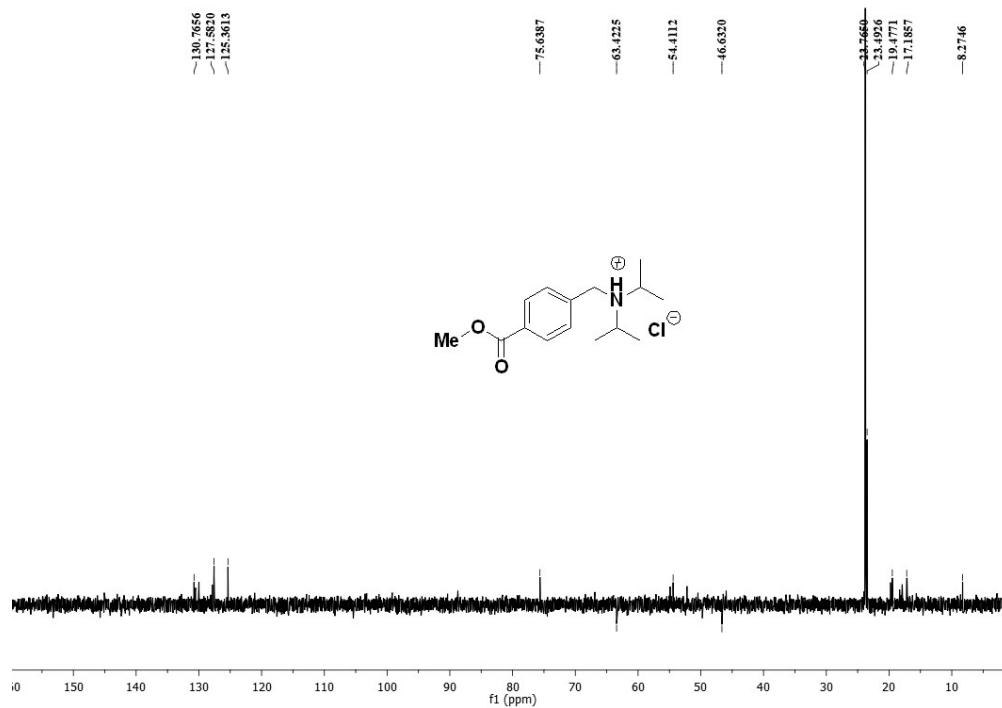

Figure FS110.  $^{13}\text{C}$ -DEPT NMR spectra of compound (4e).

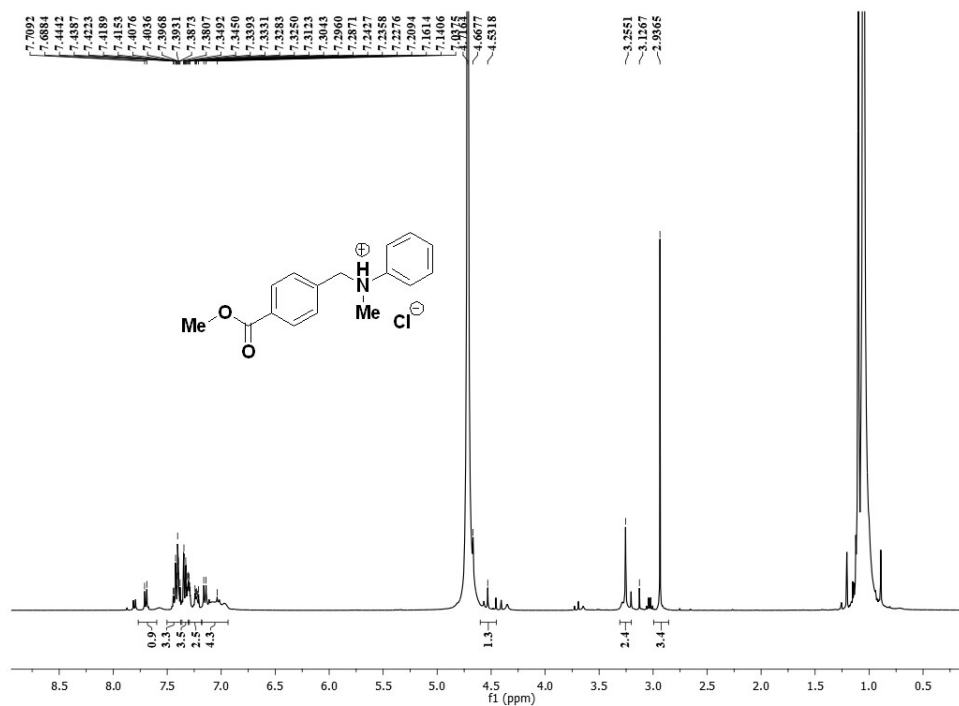

Figure FS111.  $^1\text{H}$  NMR spectra of compound (4f).

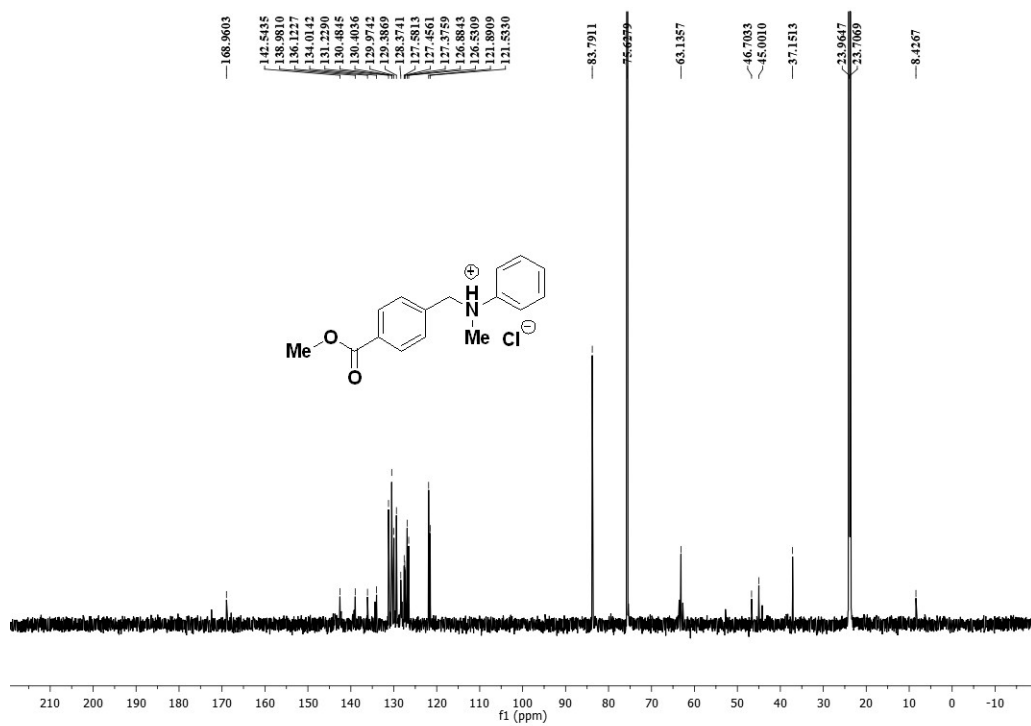

Figure FS112. <sup>13</sup>C NMR spectra of compound (4f).

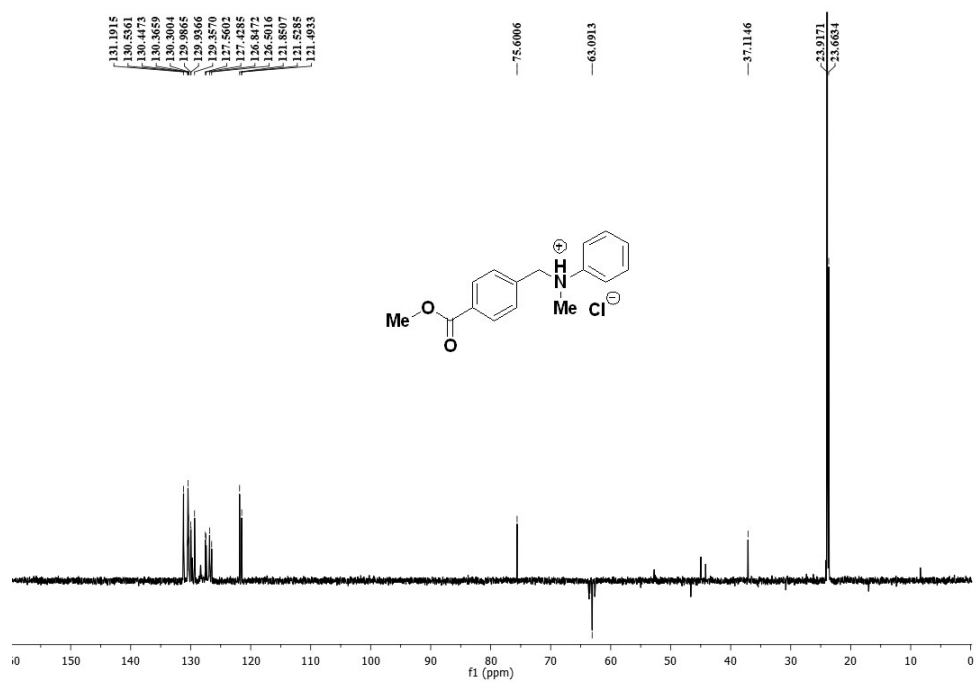

Figure FS113. <sup>13</sup>C-DEPT NMR spectra of compound (4f).

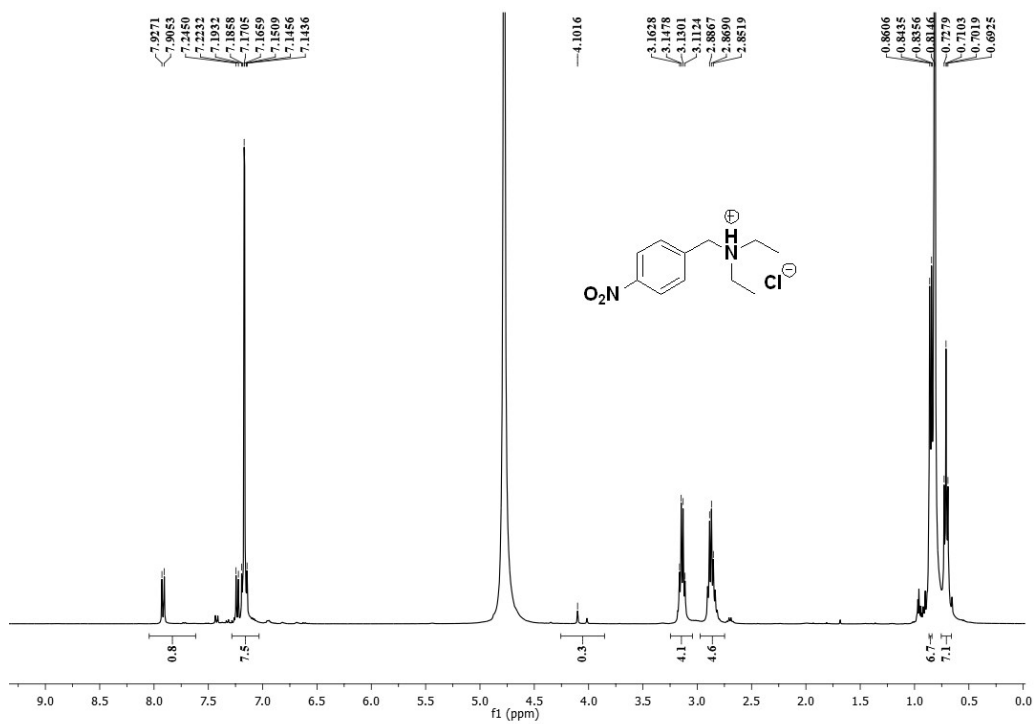

Figure FS114.  $^1\text{H}$  NMR spectra of compound (4g).

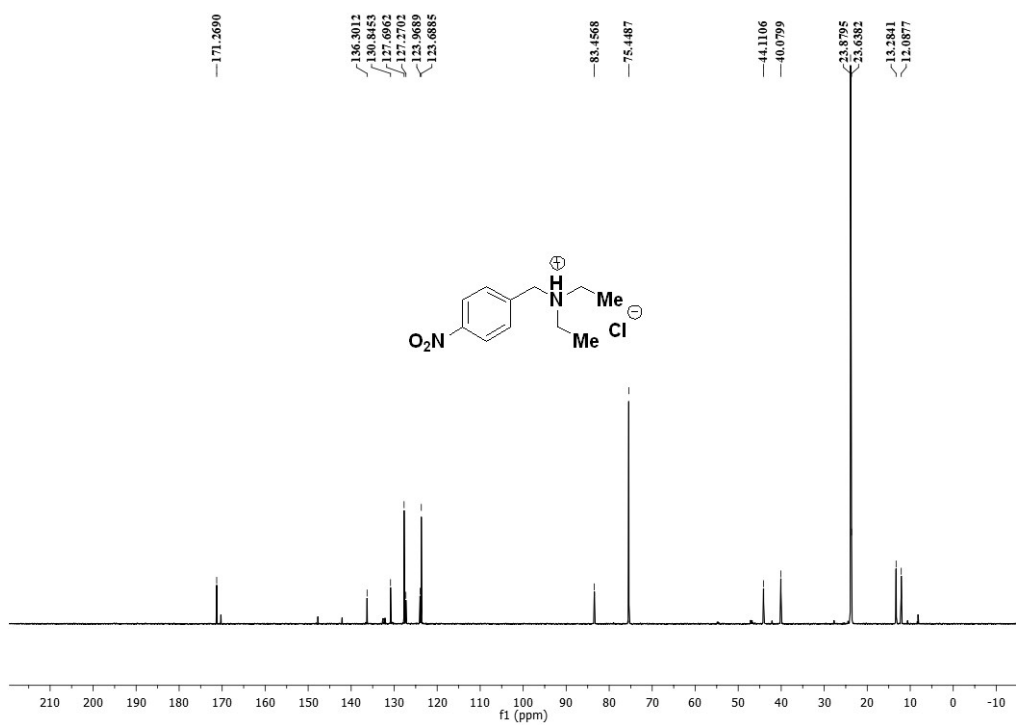

Figure FS115.  $^{13}\text{C}$  NMR spectra of compound (4g).



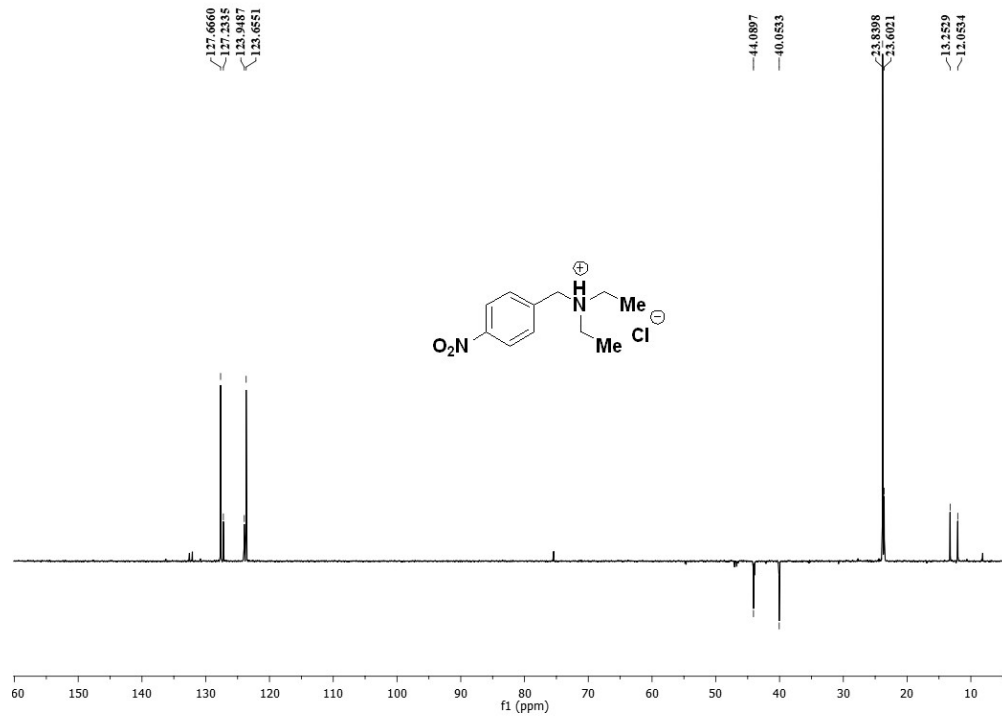

Figure FS116.  $^{13}\text{C}$ -DEPT NMR spectra of compound (4g).

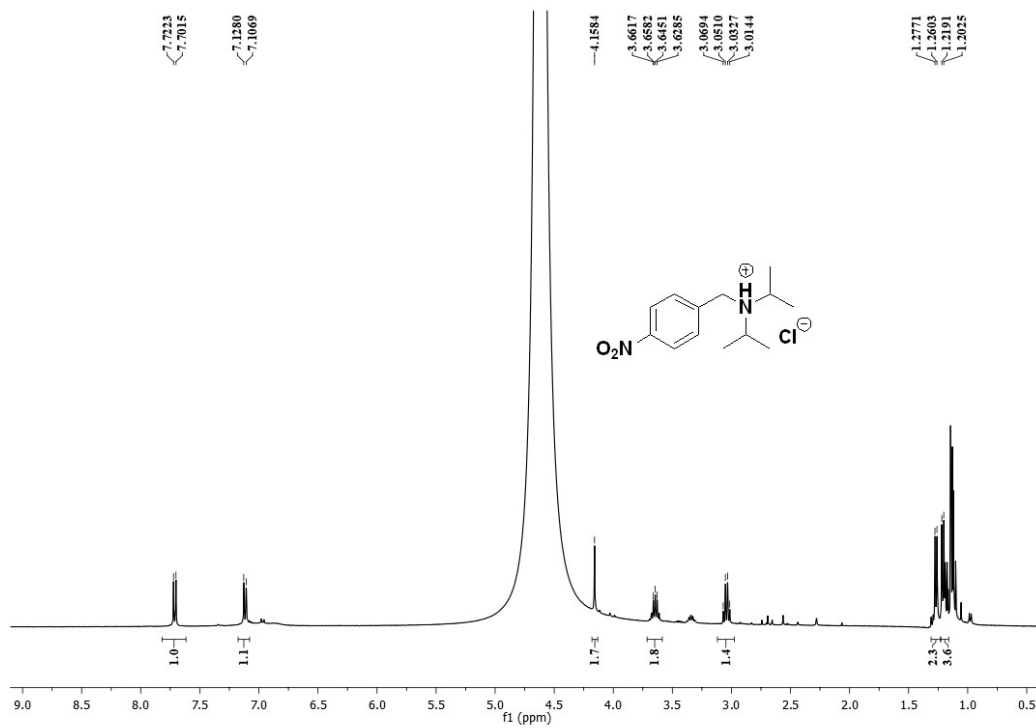

Figure FS117.  $^1\text{H}$  NMR spectra of compound (4h).

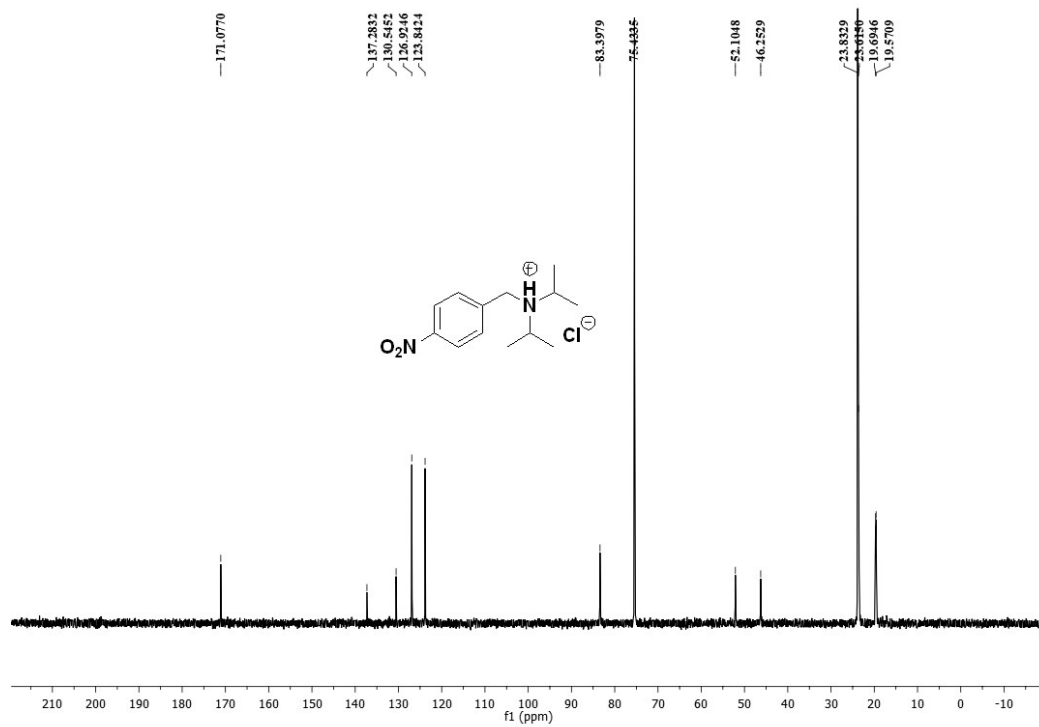

**Figure FS118.**  $^{13}\text{C}$  NMR spectra of compound (4h).

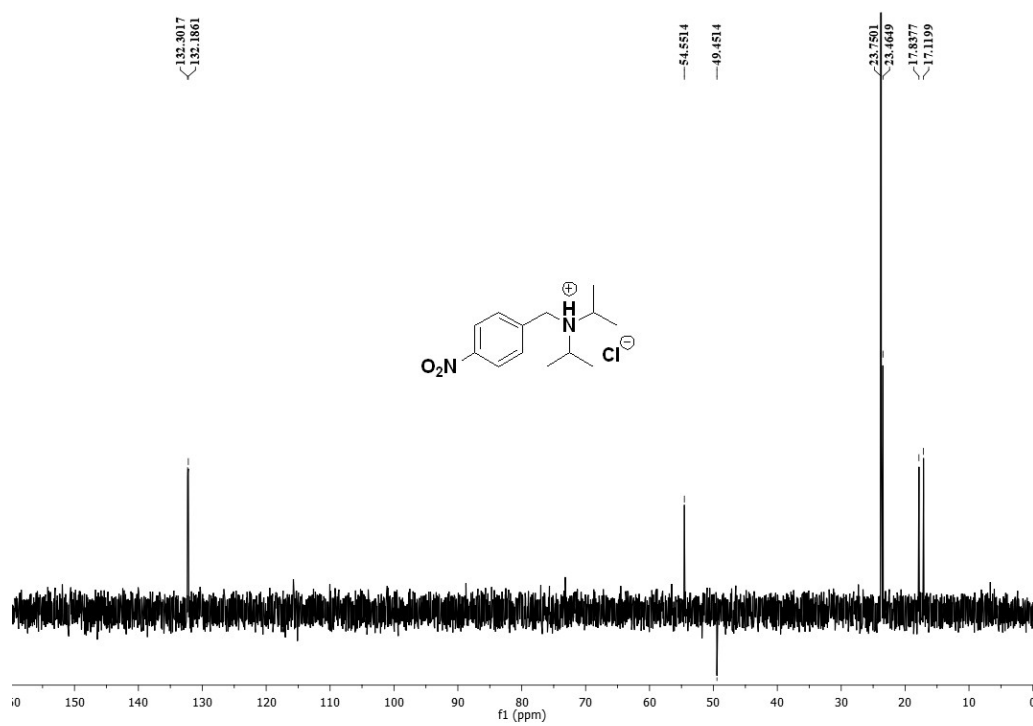

**Figure FS119.**  $^{13}\text{C}$ -DEPT NMR spectra of compound (4h).

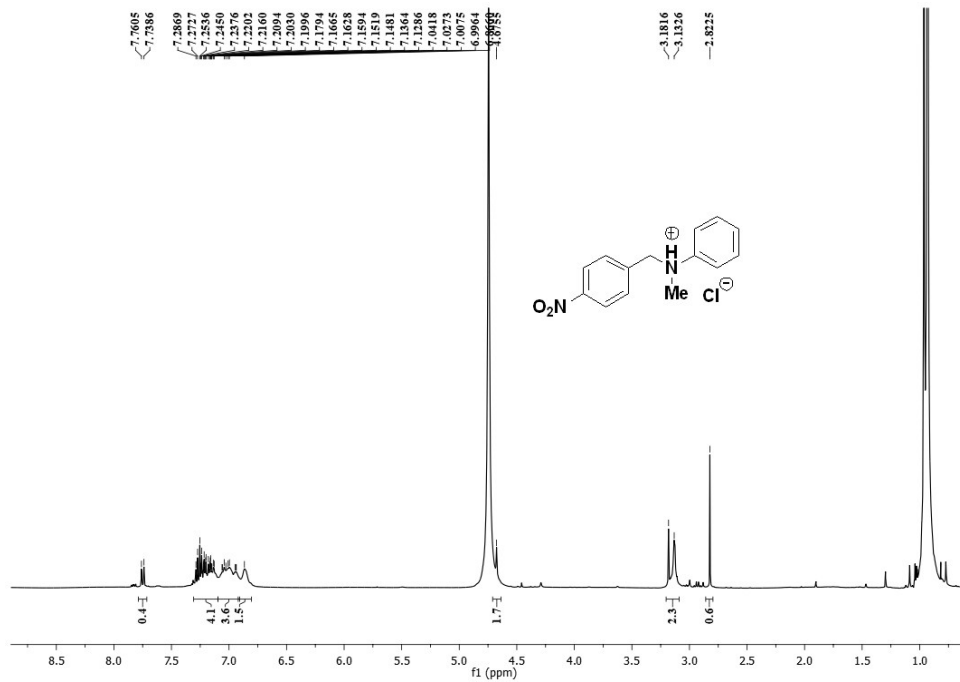

Figure FS120.  $^1\text{H}$  NMR spectra of compound (4i).

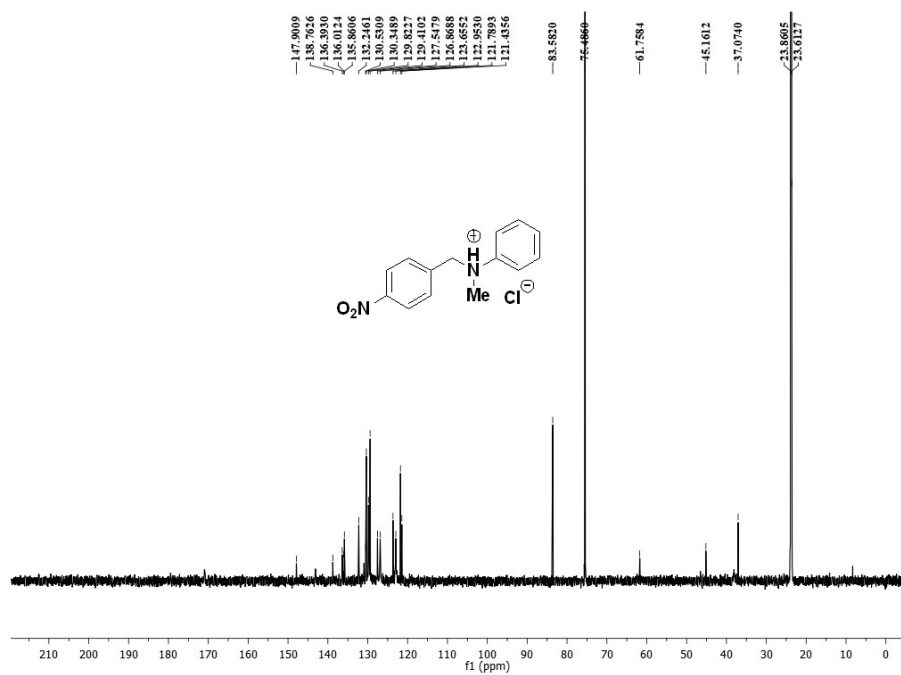

Figure FS121.  $^{13}\text{C}$  NMR spectra of compound (4i).

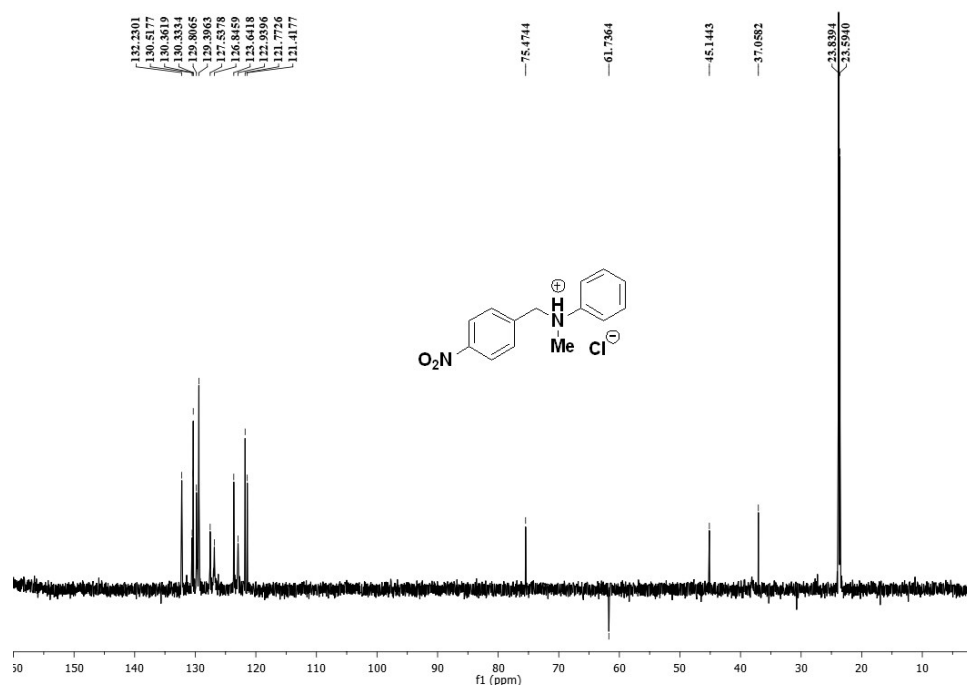

**Figure FS122.**  $^{13}\text{C}$ - DEPT NMR spectra of compound (4i).

## Kinetic studies

### Typical NMR-Scale Reaction for determining Kinetic Study by $^1\text{H}$ -NMR Arrays.

In a glove box, the respective amount of complex **2b** (0.001, 0.0015, 0.002, 0.025, 0.03 M), N,N-dimethyl benzamide (7.4 mg, 0.05 M), HBpin (12.8 mg, 0.1 M), and the internal standard, hexamethylbenzene (8.0 mg, 0.05 M), were added in a vial and after that  $\text{C}_6\text{D}_6$  (1 mL) was added to these reaction mixture. From this stock solution, 0.5 mL aliquot was taken out and it was added to rubber septum-sealed NMR tube, wrapped with parafilm, and removed from the box. The solution was set in the NMR tube at  $60^\circ\text{C}$ . After that, the tube was shaken and reinserted into the instrument again and scanning was begun. Single ( $^1\text{H}$  NMR) scans were collected at regular intervals. Substrate and/or product concentrations were determined relative to the intensity of the internal standard resonance plotted versus time.

**Kinetic Analysis.** Kinetic analysis of the NMR-scale reactions described above was carried out by collecting multiple (>10) data points early in the reaction (<20% conversion). Under these conditions, the reaction can be approximated as pseudo-zero-order with respect to the substrate

concentrations. The product concentration was measured from the area of the  $C_6H_4CH_2NMe_2$  peak formed with respect to their starting material peak standardized to the methyl peak area of the  $C_6Me_6$  internal standard.

### General Procedure for Kinetic NMR Experiments.

As expected, plots of  $\ln[PhCONMe_2]/\ln[PhCONMe_2]_0$  vs. time for a wide range of catalyst  $[Ph_2P(Se)NC_9H_6NAl(Me)_2]$  are linear (Figure FS120, Table S2). A plot of  $k_{obs}$  vs.  $[Ph_2P(Se)NC_9H_6NAl(Me)_2]$  (Figure FS121, Table S3) is also linear, with slope 0.8 which indicate the rate law of the reaction follow first order dependence with respect to catalyst  $[Ph_2P(Se)NC_9H_6NAl(Me)_2]$ . The same experiment also conducted varying wide range of concentration of  $[PhCONMe_2]$  (0.03-0.07 M) and HBpin (0.1-0.5 M) which were also linear and follows first-order dependence with respect to  $[PhCONMe_2]$  and HBpin (Figure FS123, Table S4, Figure FS125, Table S4).

**Table TS2.** Table for formation rates of  $C_6H_4CH_2NMe_2$  vs time at various concentration of catalyst  $[Ph_2P(Se)NC_9H_6NAl(Me)_2]$  (**2b**).

| S.No | $[PhCONMe_2]/$<br>Cat | Time<br>(h:m) | Conversion <sup>a</sup><br>(%) | $[PhCONMe_2]^t$ | $\ln([PhCONMe_2]_t/[PhCONMe_2]_0)$ |
|------|-----------------------|---------------|--------------------------------|-----------------|------------------------------------|
| 1    | 100/2                 | 00.00         | 0                              | 0               | 0                                  |
| 2    | 100/2                 | 01.00         | 23                             | 0.0385          | -0.261                             |
| 3    | 100/2                 | 02.00         | 35                             | 0.0325          | -0.430                             |
| 4    | 100/2                 | 03.00         | 44                             | 0.028           | -0.579                             |
| 5    | 100/2                 | 04.00         | 52                             | 0.024           | -0.734                             |
| 6    | 100/2                 | 05.00         | 61                             | 0.0195          | -0.942                             |
| 7    | 100/2                 | 06.00         | 70                             | 0.015           | -1.20                              |
| 8    | 100/2                 | 07.00         | 73                             | 0.0135          | -1.31                              |
| 9    | 100/3                 | 00.00         | 0                              | 0               | 0                                  |
| 10   | 100/3                 | 01.00         | 25                             | 0.0379          | -0.277                             |
| 11   | 100/3                 | 02.00         | 42                             | 0.029           | -0.534                             |
| 12   | 100/3                 | 03.00         | 55                             | 0.0227          | -0.788                             |
| 13   | 100/3                 | 04.00         | 64                             | 0.0182          | -1.01                              |
| 14   | 100/3                 | 05.00         | 72                             | 0.0139          | -1.28                              |
| 15   | 100/3                 | 06.00         | 81                             | 0.00105         | -1.56                              |
| 16   | 100/3                 | 07.00         | 88                             | 0.0066          | -2.02                              |
| 17   | 100/4                 | 00.00         | 0                              | 0               | 0                                  |
| 18   | 100/4                 | 01.00         | 27.5                           | 0.0362          | -0.322                             |

|    |       |       |      |         |        |
|----|-------|-------|------|---------|--------|
| 19 | 100/4 | 02.00 | 46   | 0.027   | -0.616 |
| 20 | 100/4 | 03.00 | 62.5 | 0.01875 | -0.975 |
| 21 | 100/4 | 04.00 | 70   | 0.015   | -1.20  |
| 22 | 100/4 | 05.00 | 80   | 0.010   | -1.61  |
| 23 | 100/4 | 06.00 | 87   | 0.0065  | -2.04  |
| 24 | 100/4 | 07.00 | 91   | 0.0045  | -2.41  |
| 25 | 100/5 | 00.00 | 0    | 0       | 0      |
| 26 | 100/5 | 01.00 | 29   | 0.0355  | -0.342 |
| 27 | 100/5 | 02.00 | 48   | 0.026   | -0.654 |
| 28 | 100/5 | 03.00 | 64   | 0.018   | -1.02  |
| 29 | 100/5 | 04.00 | 74   | 0.013   | -1.35  |
| 30 | 100/5 | 05.00 | 84   | 0.008   | -1.83  |
| 31 | 100/5 | 06.00 | 89.5 | 0.00525 | -2.25  |
| 32 | 100/5 | 07.00 | 93   | 0.0035  | -2.66  |
| 33 | 100/6 | 00.00 | 0    | 0       | 0      |
| 34 | 100/6 | 01.00 | 24   | 0.0379  | -0.473 |
| 35 | 100/6 | 02.00 | 60   | 0.0197  | -0.93  |
| 36 | 100/6 | 03.00 | 73   | 0.0136  | -1.3   |
| 37 | 100/6 | 04.00 | 81   | 0.0095  | -1.66  |
| 38 | 100/6 | 05.00 | 88   | 0.0058  | -2.15  |
| 39 | 100/6 | 06.00 | 93   | 0.0035  | -2.65  |
| 40 | 100/6 | 07.00 | 95   | 0.0024  | -2.98  |

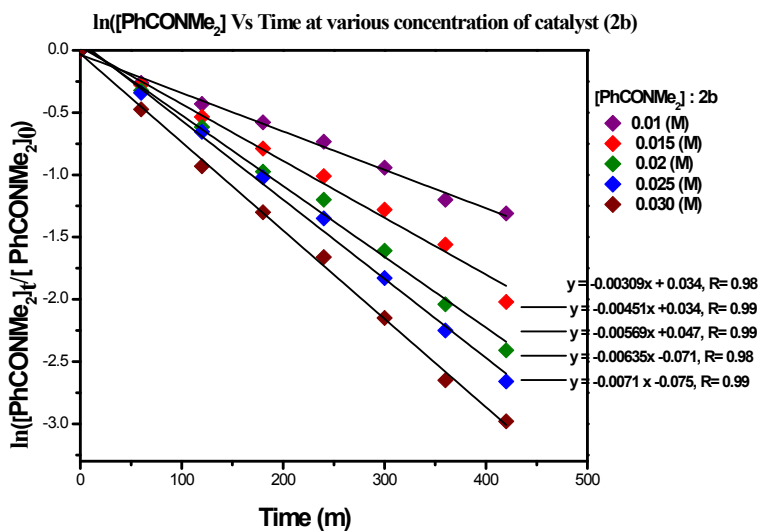

**Figure FS123.** Plots of  $\ln[\text{PhCONMe}_2]$  versus time for the Aluminium complex (**2b**) catalysed reaction of  $\text{PhCONMe}_2$  and HBpin at  $60^\circ\text{C}$  in  $\text{C}_6\text{D}_6$  (0.5 ML). The catalyst concentration was varied from 1 mM to 3 mM.

**Table TS3.** Table for formation rates of  $C_6H_4CH_2NMe_2$  vs  $[Ph_2P(Se)NC_9H_6NAl(Me)_2]$  for the reaction of  $[PhCONMe_2]$  with  $[HBpin]$  in presence of catalyst (1)  $[Ph_2P(Se)NC_9H_6NAl(Me)_2]$ . Reaction conditions:  $[HBpin] = 0.1$  M and  $[PhCONMe_2] = 0.05$  M,  $[Ph_2P(Se)NC_9H_6NAl(Me)_2] = [1 \text{ mM to } 3 \text{ mM}]$  in  $C_6D_6$  (0.5 mL).

| S.NO. | $[Ph_2P(Se)NC_9H_6NAl(Me)_2]$ | $k_{obs}$ |
|-------|-------------------------------|-----------|
| 1     | 0.001                         | 0.00309   |
| 2     | 0.0015                        | 0.0045    |
| 3     | 0.002                         | 0.00569   |
| 4     | 0.0025                        | 0.00635   |
| 5     | 0.003                         | 0.0071    |

| S.NO. | $\ln[Ph_2P(Se)NC_9H_6NAl(Me)_2]$ | $\ln k_{obs}$ |
|-------|----------------------------------|---------------|
| 1     | -6.90                            | -5.77         |
| 2     | -6.50                            | -5.4          |
| 3     | -6.21                            | -5.16         |
| 4     | -5.99                            | -5.05         |
| 5     | -5.81                            | -4.94         |

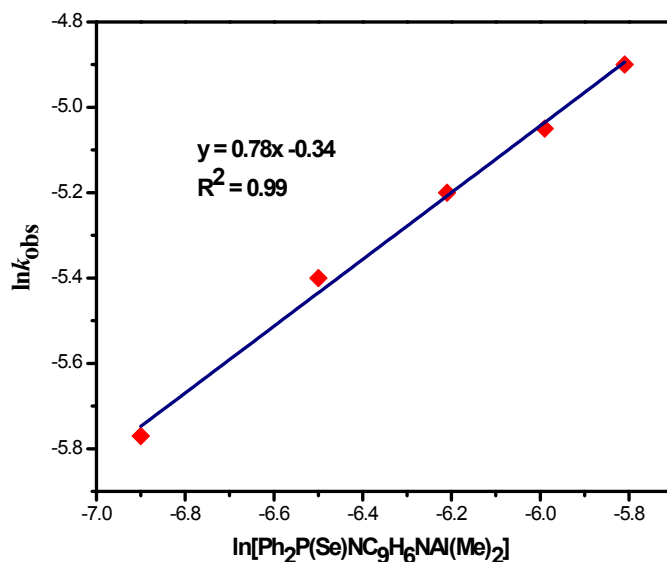

**Figure FS124.** Kinetics plots of  $\ln k_{obs}$  vs  $\ln[Ph_2P(Se)NC_9H_6NAl(Me)_2]$  for the reaction of  $[PhCONMe_2]$  with  $[HBpin]$  in presence of catalyst (2b)  $[Ph_2P(Se)NC_9H_6NAl(Me)_2]$ . Reaction conditions:  $[HBpin] = 0.1$  M and  $[PhCONMe_2] = 0.05$  M,  $[Ph_2P(Se)NC_9H_6NAl(Me)_2] = [1 \text{ mM to } 3 \text{ mM}]$  in  $C_6D_6$  (0.4 mL).

**Table TS4.** Table for Formation rates of  $C_6H_4CH_2NMe_2$  versus the ratios of  $PhCONMe_2 / HBPin$  in  $C_6D_6$  at 298 K, indicating a linear dependence. Conditions:  $Ph_2P(Se)NC_9H_6NAl(Me)_2 = 0.0020(M)$ ,  $[HBPin] = 0.1 M$  and  $[PhCONMe_2]$   $[0.03 M$  to  $0.07 M]$  in  $C_6D_6$  (0.4 mL).

| S.NO. | $[PhCONMe_2] \times 10^{-1}$ | $K_{obs}$ |
|-------|------------------------------|-----------|
| 1     | 0.3                          | 0.0094    |
| 2     | 0.4                          | 0.0151    |
| 3     | 0.5                          | 0.0185    |
| 4     | 0.6                          | 0.0215    |
| 5     | 0.7                          | 0.0262    |

| S.NO. | $\ln[PhCONMe_2]$ | $\ln k_{obs}$ |
|-------|------------------|---------------|
| 1     | -3.51            | -4.65         |
| 2     | -3.21            | -4.19         |
| 3     | -2.99            | -3.98         |
| 4     | -2.81            | -3.84         |
| 5     | -2.65            | -3.63         |

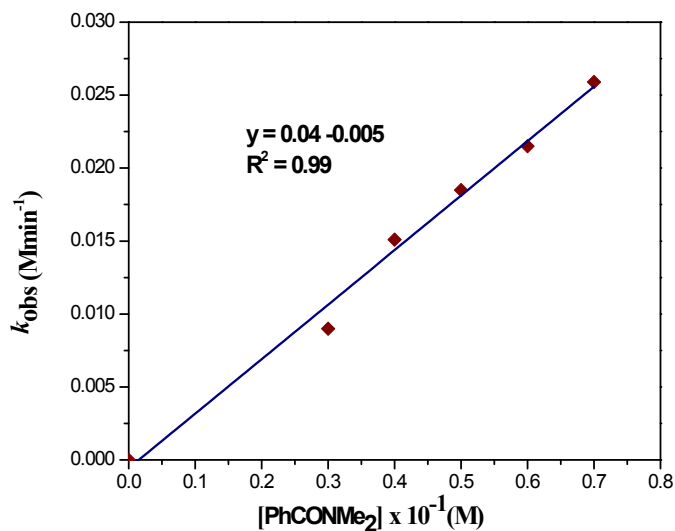

**Figure FS125.** Kinetics plots of  $k_{obs}$  vs  $[PhCONMe_2]$  for the reaction of  $[PhCONMe_2]$  with  $[HBpin]$  in presence of catalyst (**2b**)  $[Ph_2P(Se)NC_9H_6NAl(Me)_2]$ . Reaction conditions:  $Ph_2P(Se)NC_9H_6NAl(Me)_2 = 0.002 (M)$ ,  $[HBpin] = 0.1 M$  and  $[PhCONMe_2]$   $[0.003 M$  to  $0.007 M]$  in  $C_6D_6$  (0.4 mL).



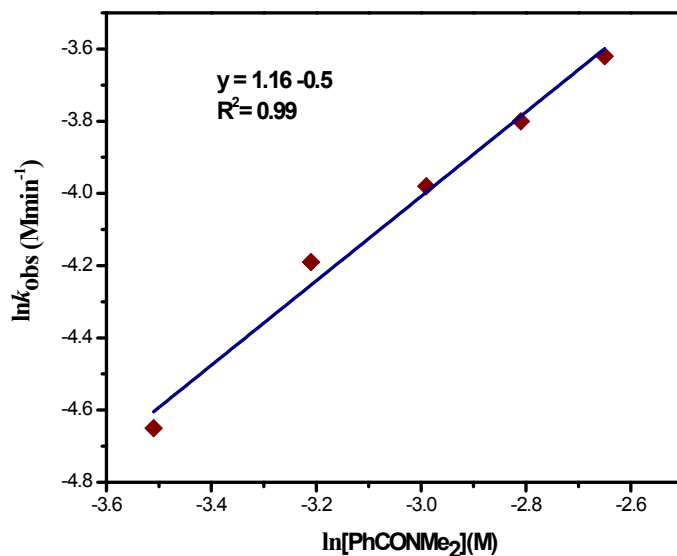

**Figure FS126.** Kinetics plots of  $\ln k_{\text{obs}}$  vs  $\ln[\text{PhCONMe}_2]$  for the reaction of  $[\text{PhCONMe}_2]$  with  $[\text{HBpin}]$  in presence of catalyst (**2b**)  $[\text{Ph}_2\text{P}(\text{Se})\text{NC}_9\text{H}_6\text{NAl}(\text{Me})_2]$ . Reaction conditions:  $\text{Ph}_2\text{P}(\text{Se})\text{NC}_9\text{H}_6\text{NAl}(\text{Me})_2 = 0.002$  (M),  $[\text{HBpin}] = 0.1$  M and  $[\text{PhCONMe}_2]$   $[0.03$  M to  $0.07$  M] in  $\text{C}_6\text{D}_6$  (0.4 mL).

**Table TS5.** Table for Formation rates of  $\text{C}_6\text{H}_4\text{CH}_2\text{NMe}_2$  versus the ratios of  $\text{PhCONMe}_2 / \text{HBpin}$  in  $\text{C}_6\text{D}_6$  at  $60^\circ\text{C}$ , indicating a linear dependence. Conditions:  $[\text{Ph}_2\text{P}(\text{Se})\text{NC}_9\text{H}_6\text{NAl}(\text{Me})_2] = 0.002(\text{M})$ ,  $[\text{PhCONMe}_2] = 0.05$  M and  $[\text{HBpin}] [0.1$  M to  $0.5$  M] in  $\text{C}_6\text{D}_6$  (0.4 mL).

| S.NO. | $[\text{HBpin}]$ | $k_{\text{obs}}$ |
|-------|------------------|------------------|
| 1     | 0.1              | 0.011            |
| 2     | 0.2              | 0.0141           |
| 3     | 0.3              | 0.0195           |
| 4     | 0.4              | 0.0225           |
| 5     | 0.5              | 0.0249           |

| S.NO. | $\ln[\text{HBpin}]$ | $\ln k_{\text{obs}}$ |
|-------|---------------------|----------------------|
| 1     | -2.30               | -4.51                |
| 2     | -1.61               | -4.2                 |
| 3     | -1.203              | -3.94                |
| 4     | -0.916              | -3.79                |
| 5     | -0.693              | -3.69                |

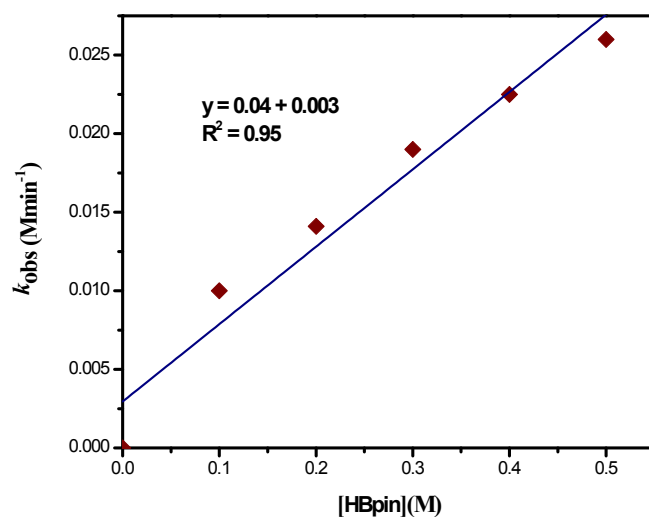

**Figure FS127.** Kinetics plots of  $k_{obs}$  vs [HBpin] for the reaction of [PhCONMe<sub>2</sub>] with [HBpin] in presence of catalyst (**2b**) [Ph<sub>2</sub>P(Se)NC<sub>9</sub>H<sub>6</sub>NAI(Me)<sub>2</sub>]. Reaction conditions: Ph<sub>2</sub>P(Se)NC<sub>9</sub>H<sub>6</sub>NAI(Me)<sub>2</sub>] = 0.02 (M), [PhCONMe<sub>2</sub>] = 0.05 M and [HBpin] = 0.1 M to 0.5 M] in C<sub>6</sub>D<sub>6</sub> (0.4 mL).

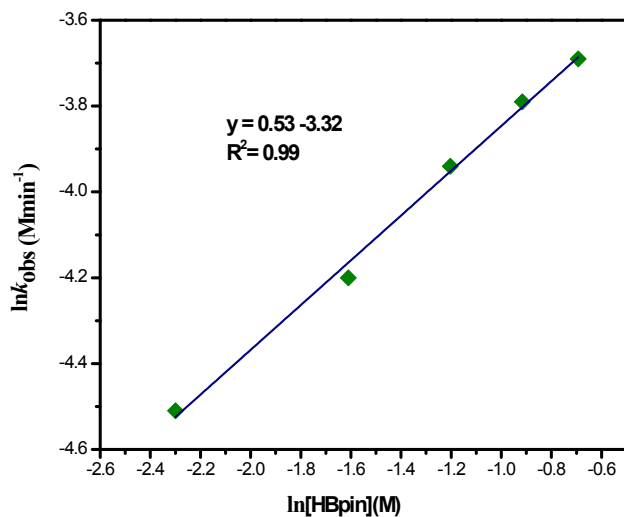

**Figure FS128.** Kinetics plots of  $\ln k_{obs}$  vs  $\ln$ [HBpin] for the reaction of [PhCONMe<sub>2</sub>] with [HBpin] in presence of catalyst (**2b**) [Ph<sub>2</sub>P(Se)NC<sub>9</sub>H<sub>6</sub>NAI(Me)<sub>2</sub>]. Reaction conditions: [Ph<sub>2</sub>P(Se)NC<sub>9</sub>H<sub>6</sub>NAI(Me)<sub>2</sub>] = 0.002 (M), [PhCONMe<sub>2</sub>] = 0.05 M and [HBpin] = 0.1 M to 0.5 M] in C<sub>6</sub>D<sub>6</sub> (0.4 mL).

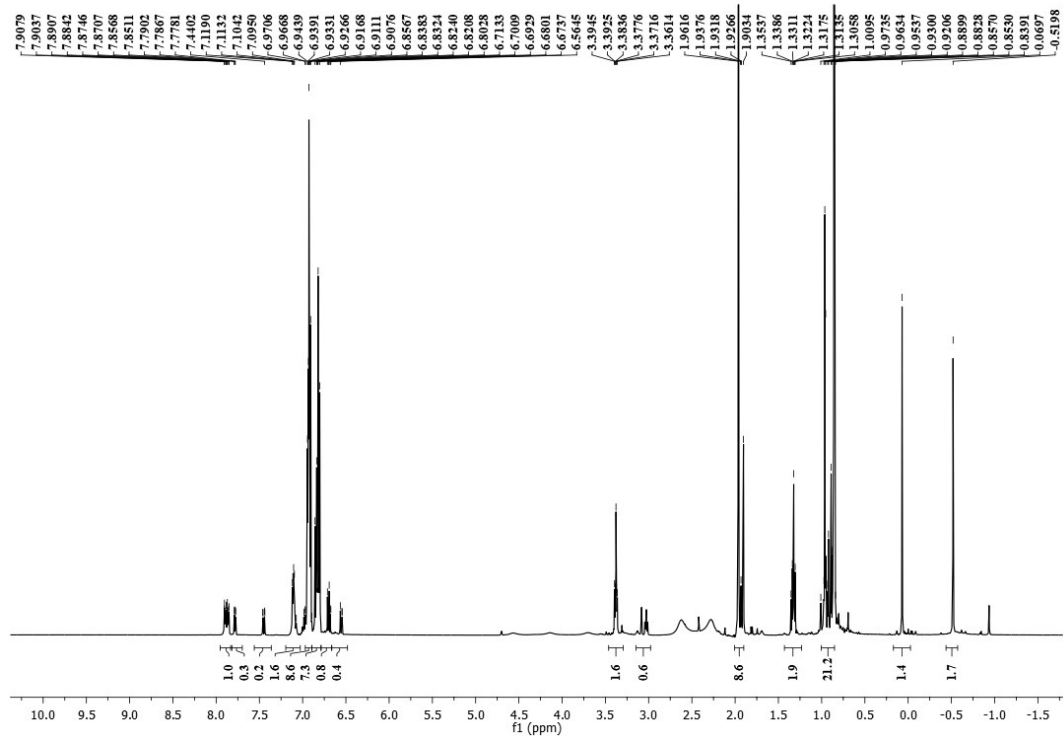

**Figure FS129 :**  $^1\text{H}$  NMR spectrum of N, N dimethylbenzamide + HBpin + aluminium complex (2a) (1:1:1) reaction mixture in Tol- $d_8$  solvent.

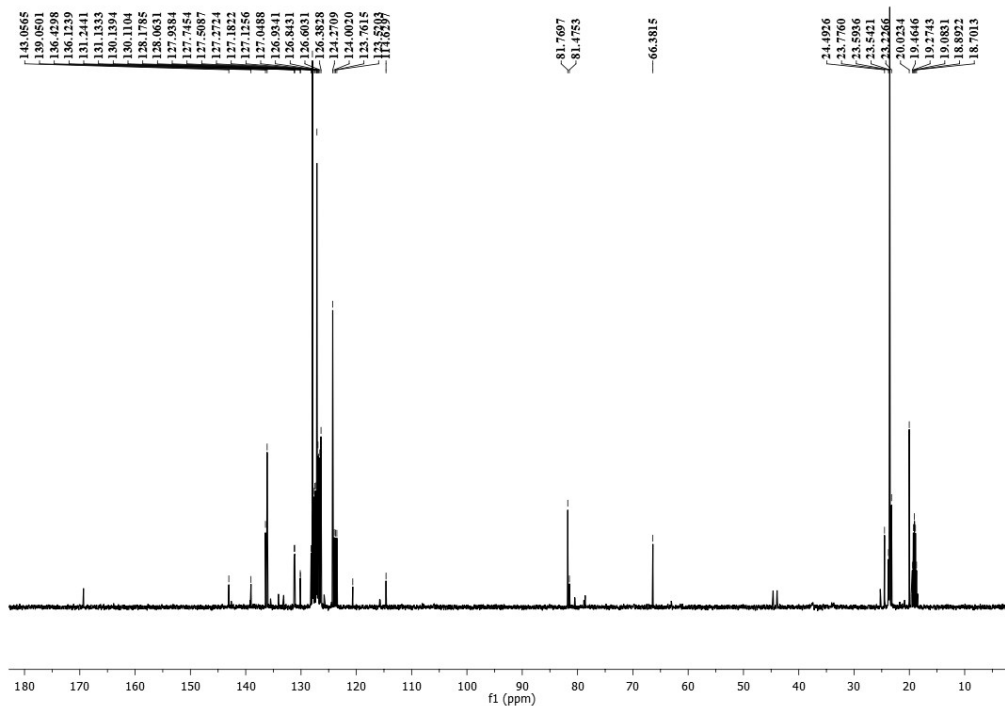

**Figure FS130.**  $^{13}\text{C}$  NMR spectrum of N, N dimethylbenzamide + HBpin + aluminium complex (2a) (1:1:1) reaction mixture in Tol- $d_8$  solvent.

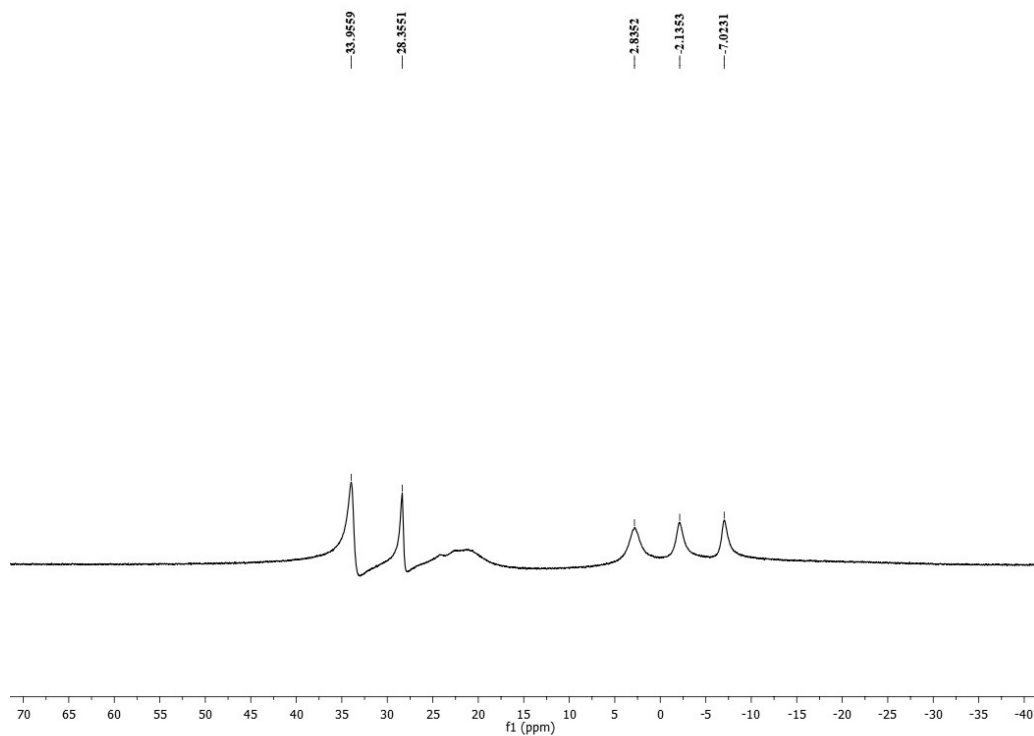

**Figure FS131.**  $^{11}\text{B}$  NMR spectrum of N, N dimethylbenzamide + HBpin + aluminium complex (**2a**) (1:1:1) reaction mixture in Tol- $\text{d}_8$  solvent.

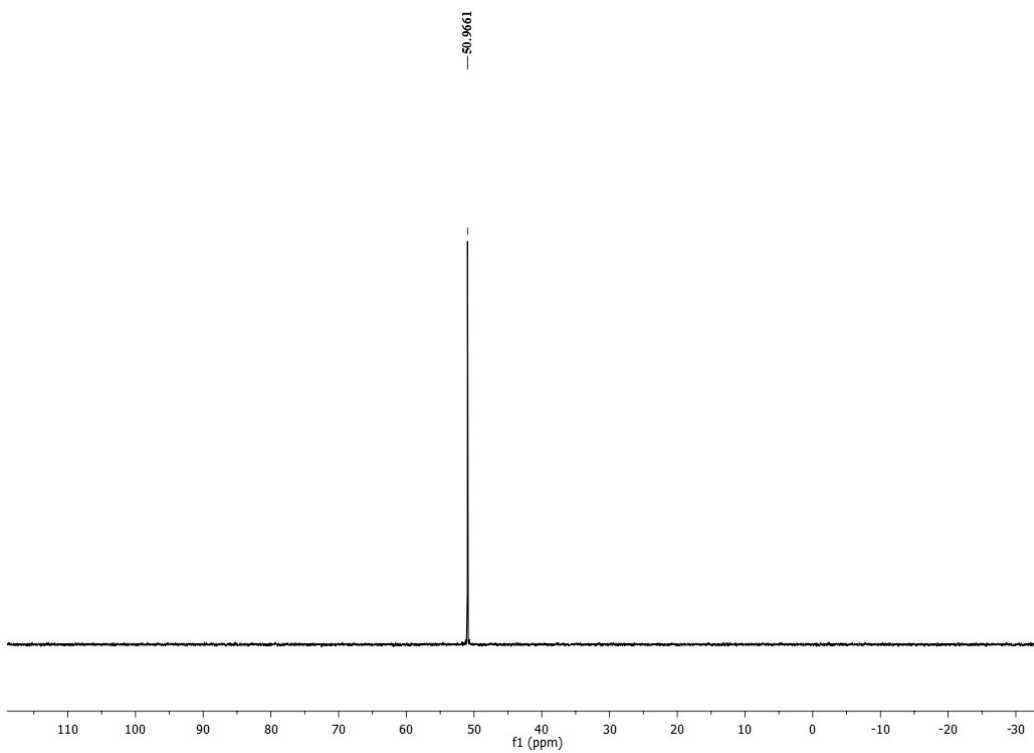

**Figure FS132.**  $^{31}\text{P}$  NMR spectrum of N, N dimethylbenzamide + HBpin + aluminium complex (**2a**) (1:1:1) reaction mixture in Tol- $d_8$  solvent.

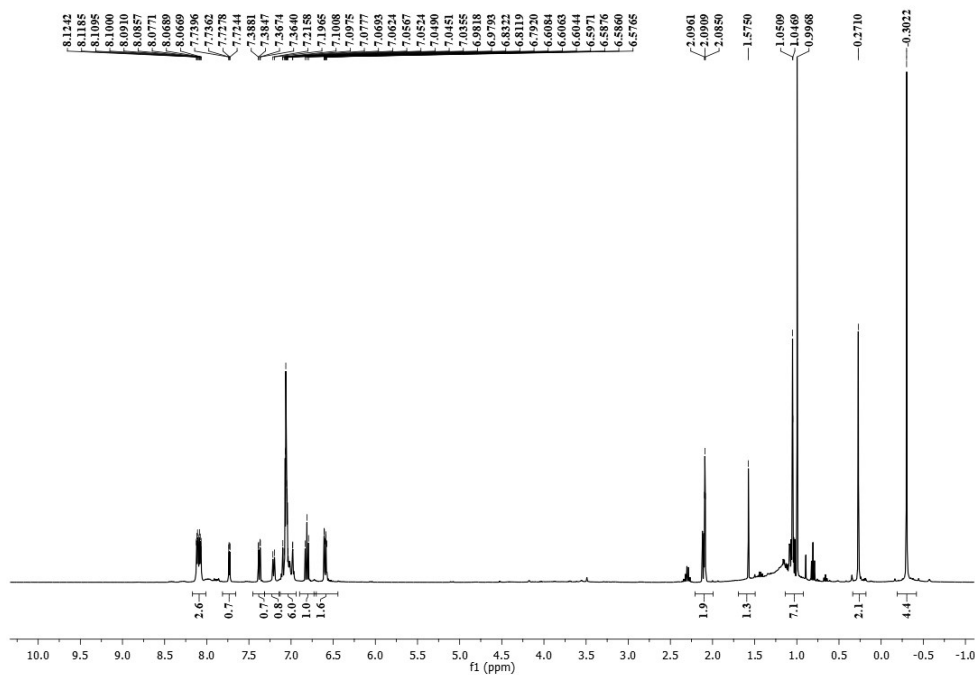

**Figure FS133.**  $^1\text{H}$  NMR spectrum of aluminium complex (**2a**) and HBpin (1:1) reaction mixture in Tol- $d_8$  solvent.

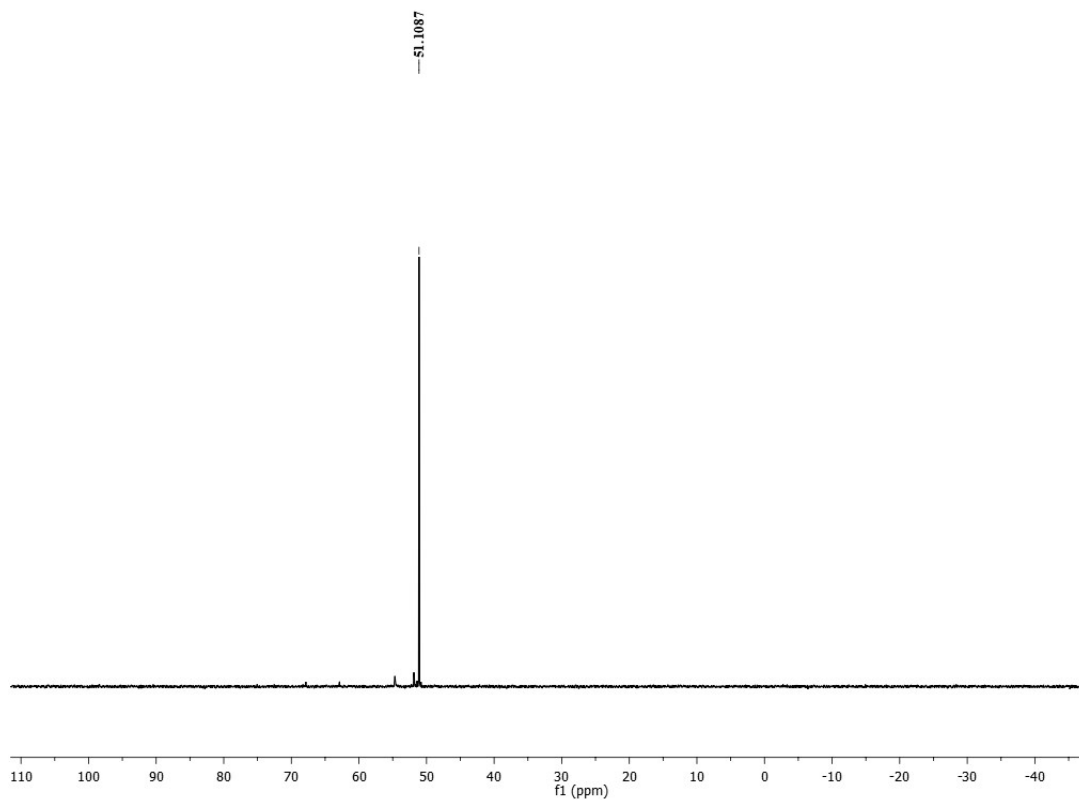

**Figure FS134.**  $^{31}\text{P}$  NMR spectrum of aluminium complex (**2a**) and HBpin (1:1) reaction mixture in Tol- $\text{d}_8$  solvent.

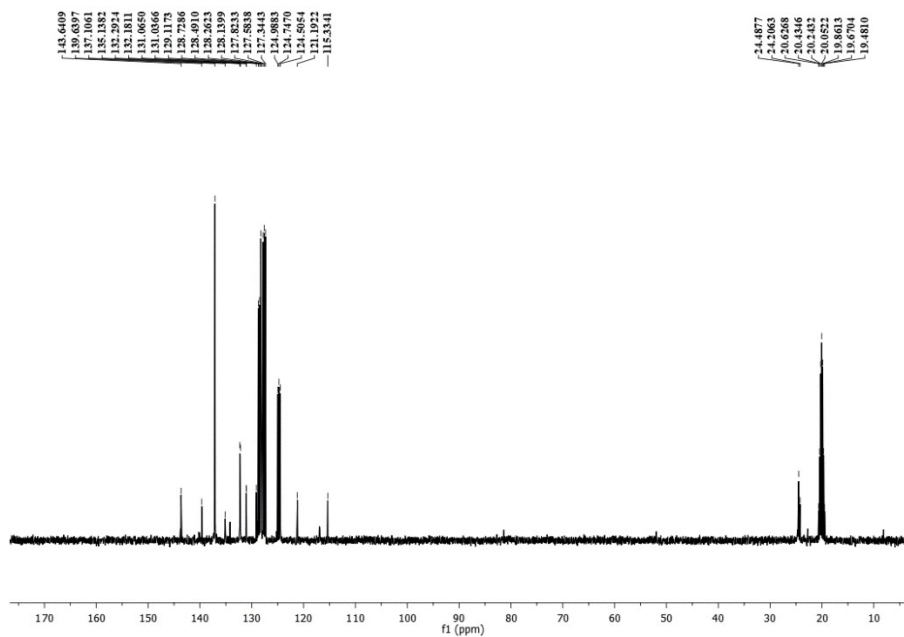

**Figure FS135.**  $^{13}\text{C}$  NMR spectrum of aluminium complex (**2a**) and HBpin (1:1) reaction mixture in Tol- $\text{d}_8$  solvent.

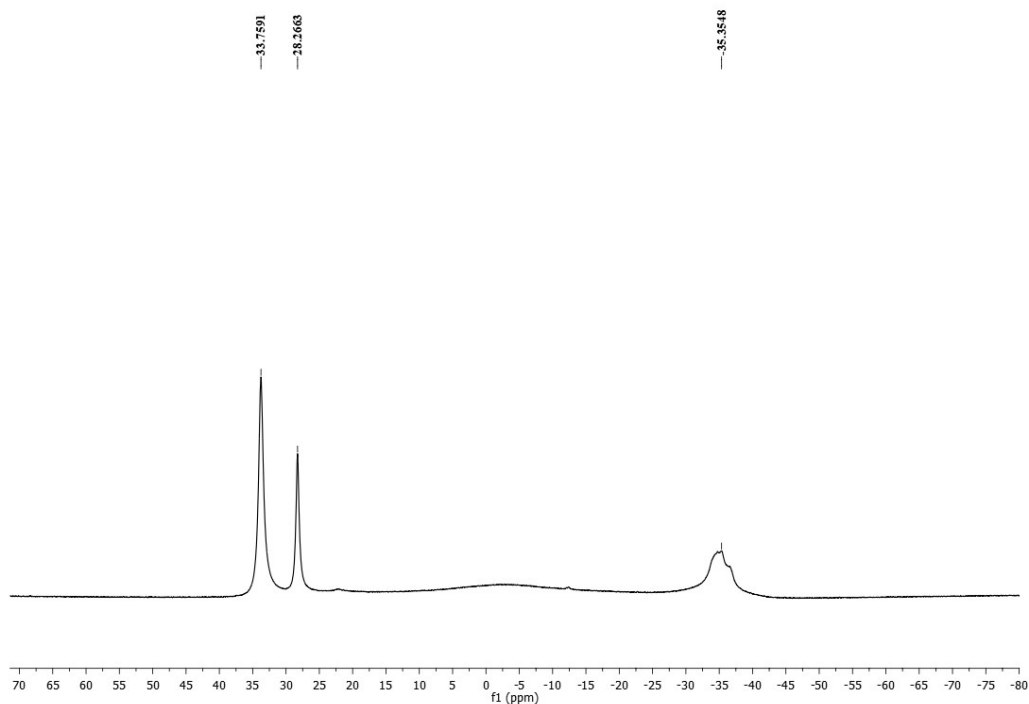

**Figure FS136.**  $^{11}\text{B}$  NMR spectrum of aluminium complex (**2a**) and HBpin (1:1) reaction mixture in  $\text{To}_8$  solvent.

#### References.

1. (a) A. Altomare, M. Cascarano, C. Giacobazzo and A. Guagliardi, *J. Appl. Crystallogr.*, 1993, **26**, 343;  
(b) M. C. Burla, R. Caliandro, M. Camalli, B. Carrozzini, G. L. Cascarano, L. De Caro, C. Giacobazzo, G. Polidori and R. Spagna, *J. Appl. Crystallogr.*, 2005, **38**, 381.
2. G. M. Sheldrick, *Acta Crystallogr., Sect. A: Found. Crystallogr.*, 2008, **64**, 112.
3. N. Sakai, K. Fuhji and T. Konakahara, *Tetrahedron Lett.* 2008, **49**, 6873–6875.
4. M. Igarashi and T. Fuchikami, *Tetrahedron Lett.* 2001, **42**, 1945.
5. D. L. Dodds, and D. J. Cole-Hamilton, In *Sustainable Catalysis*; Wiley: Hoboken, NJ, 2013; pp 1-36.
6. H. C. Brown, *Hydroboration*. W. A. Benjamin: New York, 1962.
7. S. Hanada, Y. Motoyama and H. Nagashima, *Tetrahedron Lett.* 2006, **47**, 6173.
8. M. Igarashi and T. Fuchikami, *Tetrahedron Lett.* 2001, **42**, 1945.
